# Supplementary material
Source: PubMed Central journal article supplement (PMC3844869)
Supplement: NIHMS522590-supplement-1.pdf [file NIHMS522590-supplement-1.pdf]

## Supplementary Information

### Orthogonal Cas9 Proteins for RNA-Guided Gene Regulation and Editing

Kevin M. Esvelt,<sup>1,4</sup> Prashant Mali,<sup>2,4</sup> Jonathan L. Braff,<sup>1</sup> Mark Moosburner,<sup>2</sup> Stephanie Yaung,<sup>1,2,3</sup>  
and George M. Church<sup>1,2,5</sup>

<sup>1</sup>Wyss Institute for Biologically Inspired Engineering, Harvard Medical School, Boston, MA 02115, USA.

<sup>2</sup>Department of Genetics, Harvard Medical School, Boston, MA 02115, USA. <sup>3</sup>Program in Medical Engineering & Medical Physics, Harvard-MIT Division of Health Sciences and Technology, Massachusetts Institute of Technology, Cambridge, Massachusetts 02139, USA.

<sup>4</sup>These authors contributed equally to this work. <sup>5</sup>Correspondence should be addressed to [gchurch@genetics.med.harvard.edu](mailto:gchurch@genetics.med.harvard.edu)

| <b>Section</b>                                                            | <b>Page</b> |
|---------------------------------------------------------------------------|-------------|
| Supplementary Fig. 1 crRNA-tracrRNA interactions for each type II system  | 2           |
| Supplementary Fig. 2 Protospacer and PAM sequences in Cas9 recognition    | 3           |
| Supplementary Fig. 3 SP sgRNAs and editing efficiencies                   | 4           |
| Supplementary Fig. 4 NM sgRNAs and editing efficiencies                   | 5           |
| Supplementary Fig. 5 ST1 sgRNAs and editing efficiencies                  | 6           |
| Supplementary Fig. 6 Orthogonal gene editing in human cells               | 7           |
| Supplementary Fig. 7 Orthogonality arises primarily from sgRNAs, not PAMs | 8           |
| Supplementary Table 1 List of plasmids available from Addgene             | 9           |
| Supplementary Table 2 sgRNA sequence designs for SP, ST1, and NM          | 10-14       |
| Supplementary Table 3 Library amplification and sequencing primers        | 15          |
| Supplementary Note 1 Depletion biases in Cas9 library experiments         | 16          |
| Supplementary Note 2 Expressing novel Cas9 orthologs in bacteria          | 17          |
| Supplementary Note 3 Sequences of cas9 genes for bacterial experiments    | 18-22       |
| Supplementary Note 4 Sequences of cas9 genes for human cell experiments   | 23-30       |
| Supplementary Software 1 patternProp.py script                            | 31-32       |
| Supplementary Software 2 patternProp3.py script                           | 33-34       |

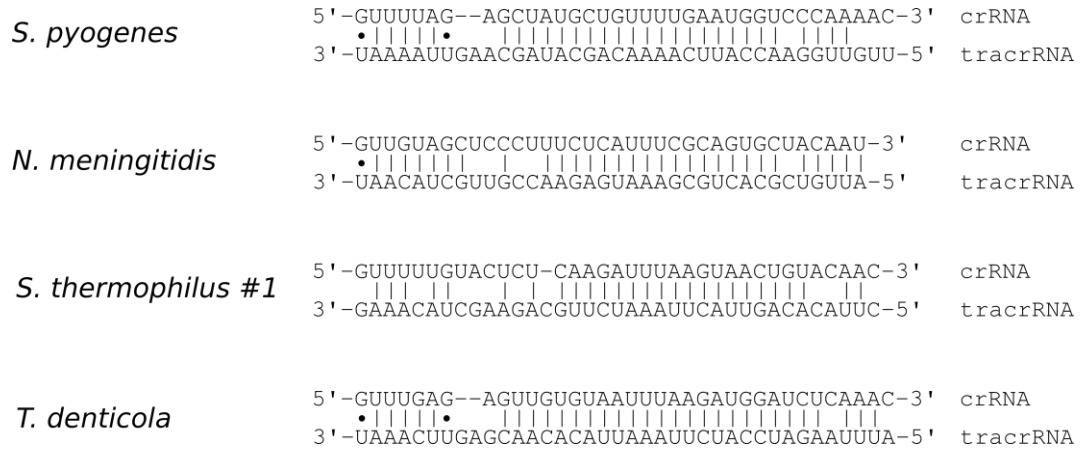

**Supplementary Figure 1** | crRNA-tracrRNA interactions for each type II system.

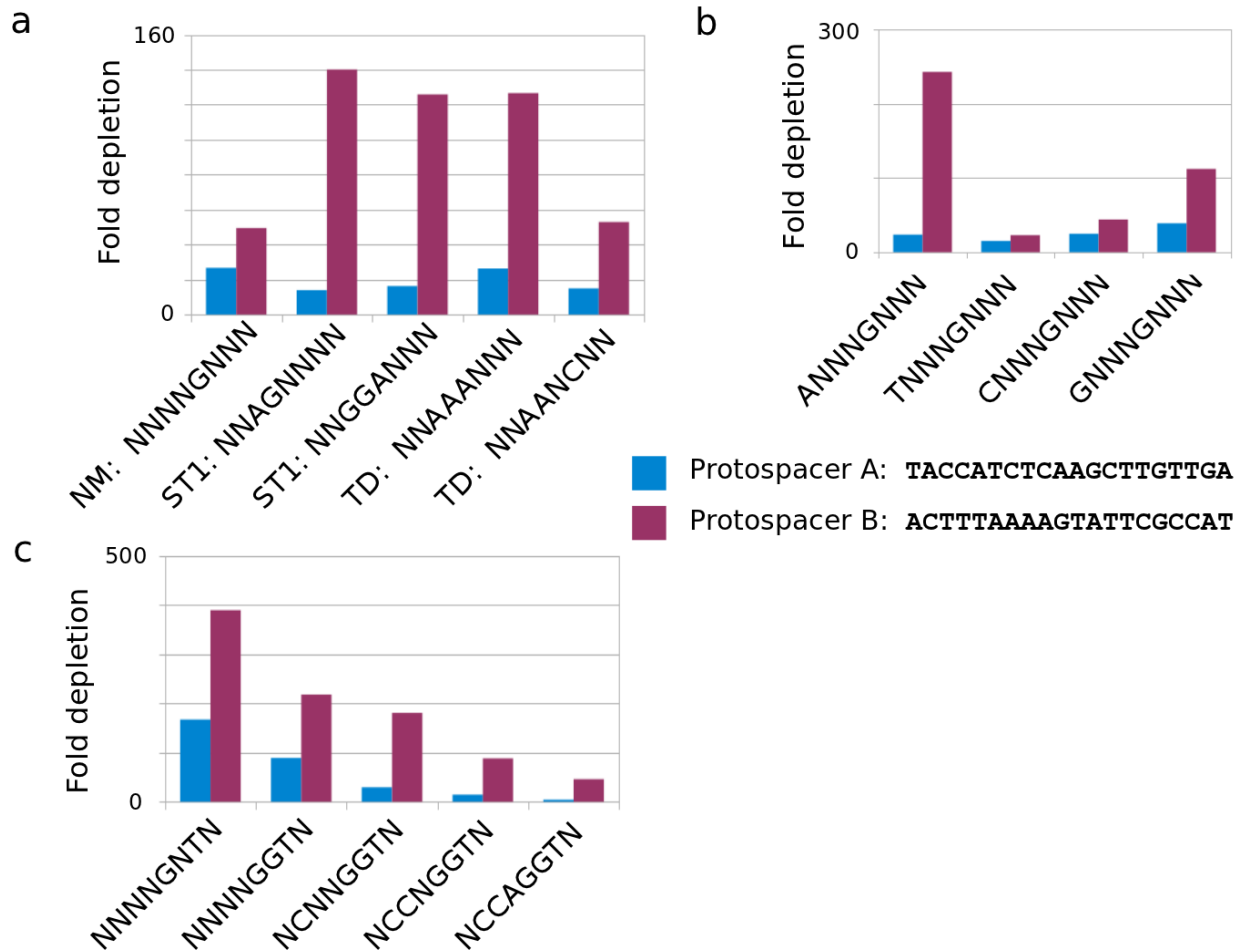

**Supplementary Figure 2** | Protospacer and PAM sequences in Cas9 recognition. (a) Relative depletion of the two protospacers differs by Cas9 protein. Sequences with moderate-activity PAMs, whose fold depletion is minimally biased by transformation efficiency or Cas9 inactivation, display markedly different relative depletion patterns for the different Cas9 proteins. In general, ST1 > TD > NM in relative depletion of protospacer B over protospacer A. (b) Relative protospacer depletion is influenced by bases in the PAM region. NM depletes both protospacers approximately equally for TNNNG, but favors protospacer 2 by 2-fold for CNNNG, 3-fold for GNNNG, and 10-fold for ANNNG. (c) Specific unfavored bases can dramatically reduce PAM recognition. Although NNNNGNT is depleted by ~160-fold with protospacer library 1, the addition of successive unfavored mutations reduces fold depletion to only 4-fold for NCCAGGT. Results are drawn from a single library selection experiment.

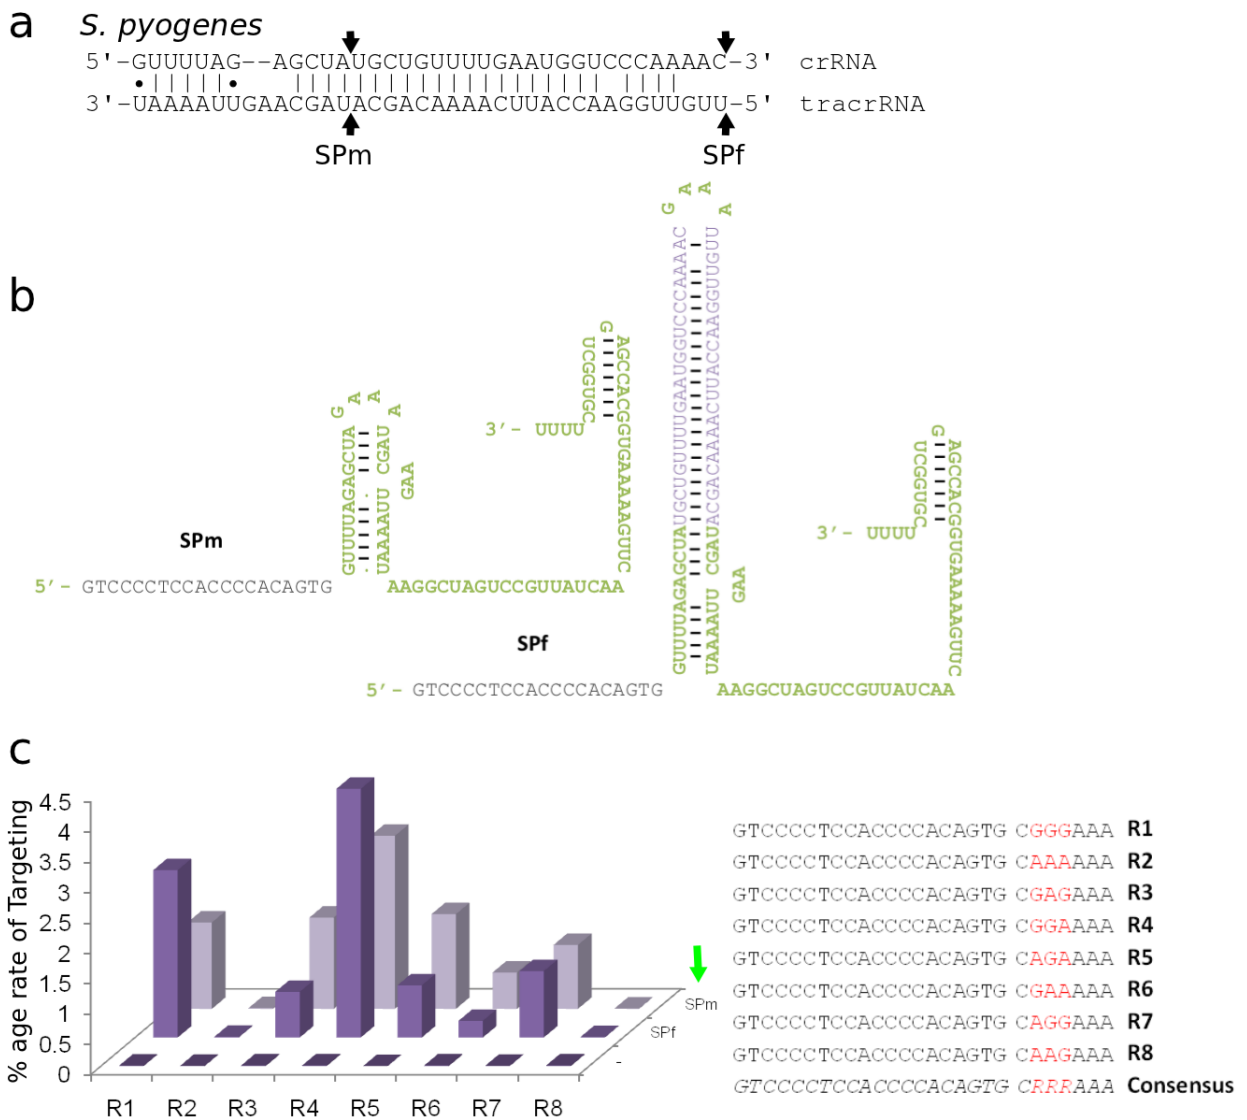

**Supplementary Figure 3 | SP sgRNAs and editing efficiencies.** (a) sgRNA truncation points for SP. (b) Fully drawn sgRNAs corresponding to the above. (c) Profile of SP activity in human cells with each sgRNA with different PAMs (n=3 biological replicates). SPm is the traditional sgRNA and was used in future experiments (green arrow).

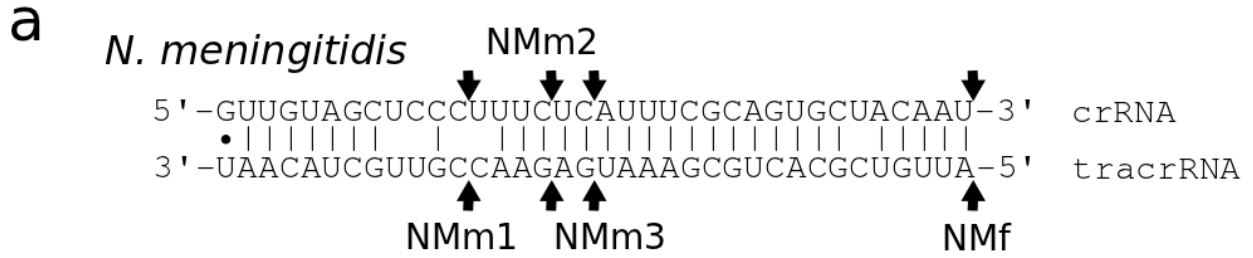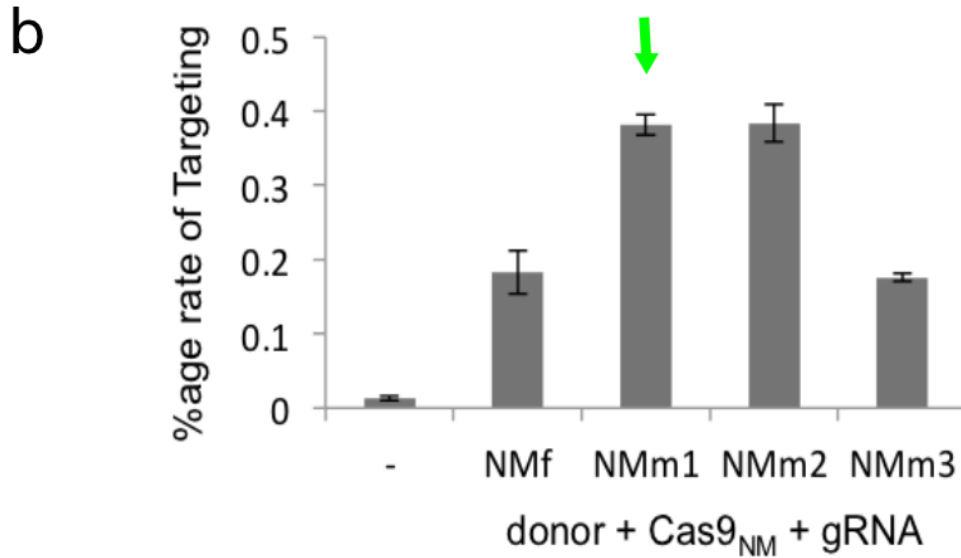

**Supplementary Figure 4** | NM sgRNAs and editing efficiencies. (a) Truncation points for NM sgRNAs. (b) NM activity in human cells with each sgRNA and a GGAGGATT PAM. NMm1 was selected for use in future experiments (green arrow). Error bars represent the standard deviation of three biological replicates.

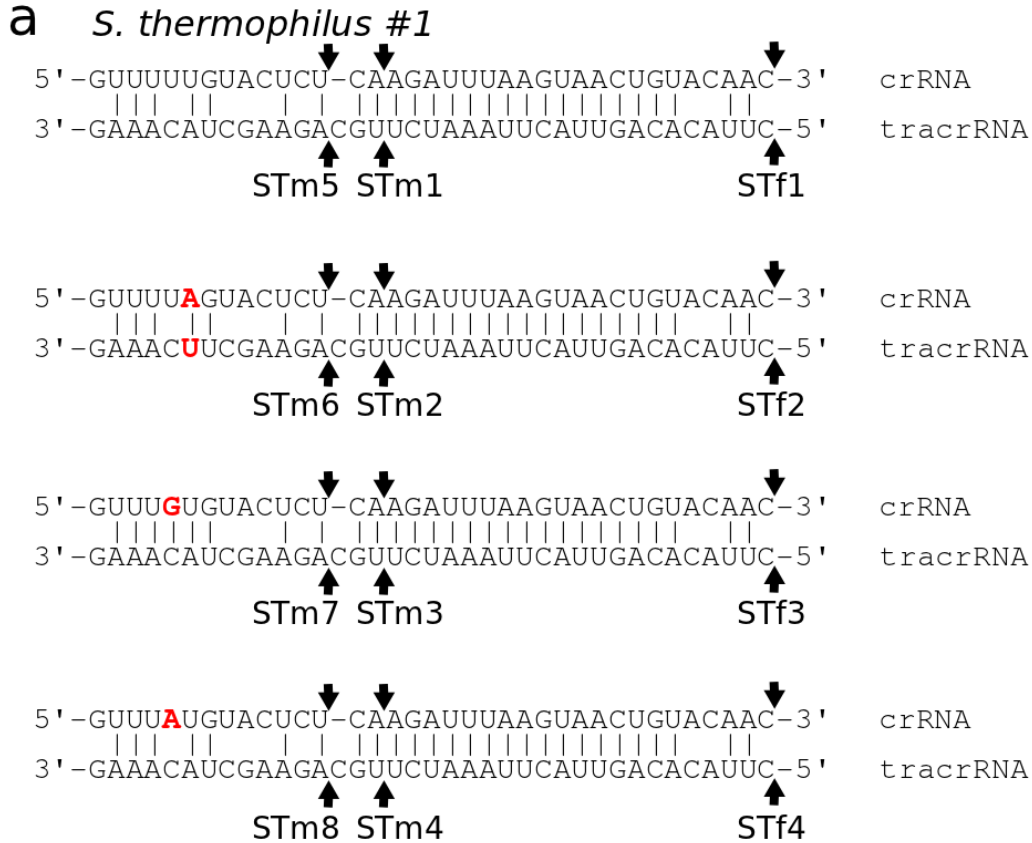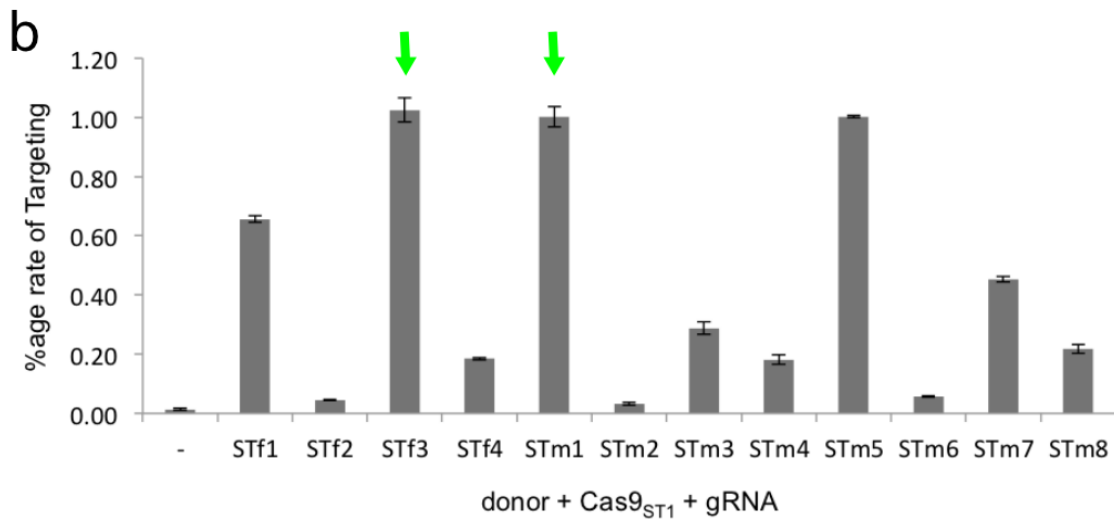

**Supplementary Figure 5** | ST1 sgRNAs and editing efficiencies. (a) Truncation points and point mutations for ST1 sgRNAs. (b) ST1 activity in human cells with each sgRNA and a CAAGAA PAM. STf3 was used for the experiments illustrated in Supplementary Figure 8; all other experiments utilized STm1 (green arrows). Error bars represent the standard deviation of three biological replicates.

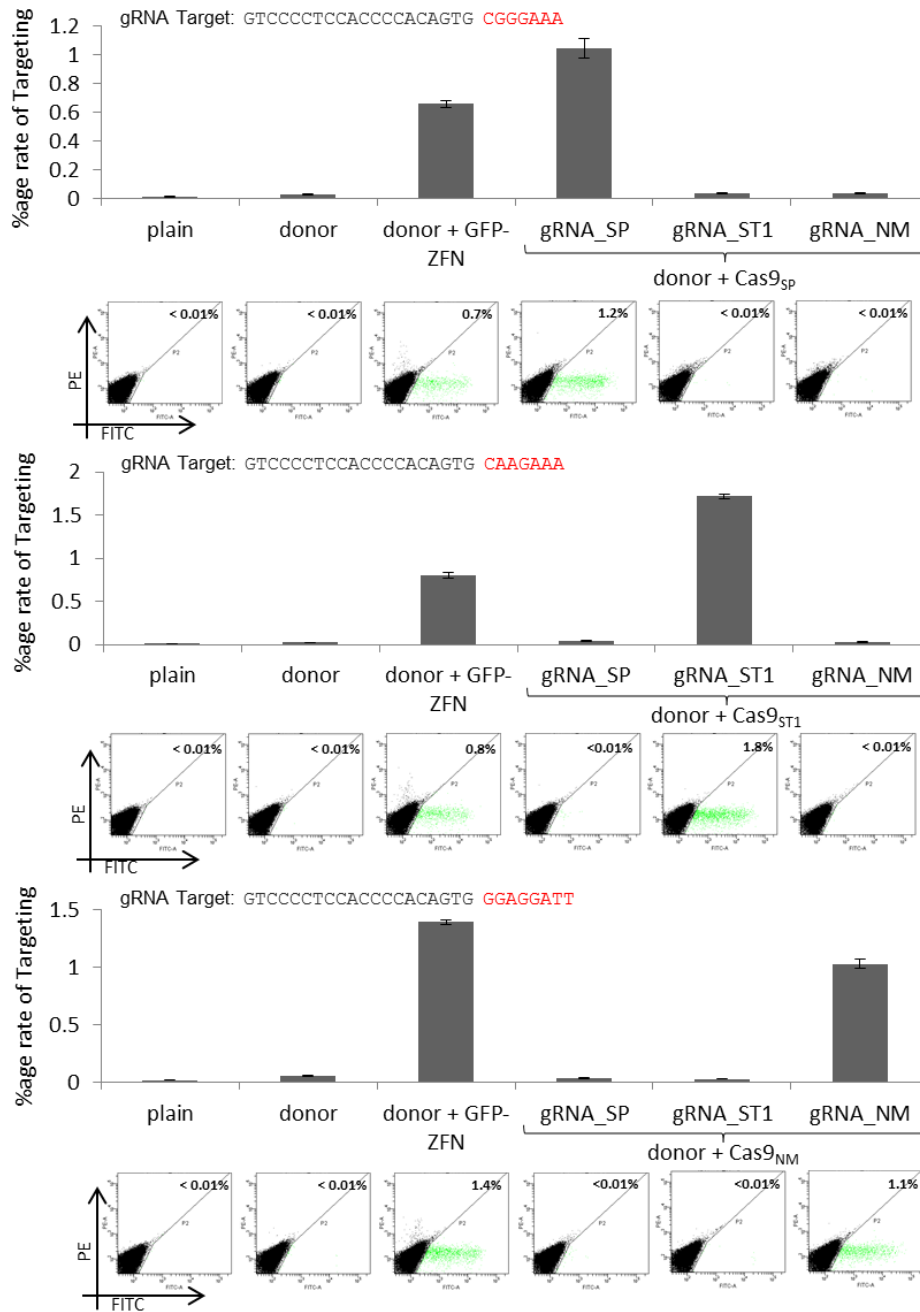

**Supplementary Figure 6** | Orthogonal gene editing in human cells. Editing efficiencies are depicted for (a) SP (b) ST1 and (c) NM. Activity was measured using a homologous recombination-mediated GFP repair assay and quantified by flow cytometry (plots from Fig. 6 are reproduced here). Included for comparison is a ZFN cleaving an adjacent target sequence. sgRNAs are those indicated in Supplemental Figures 3-5. Error bars represent the standard deviation of three biological replicates.

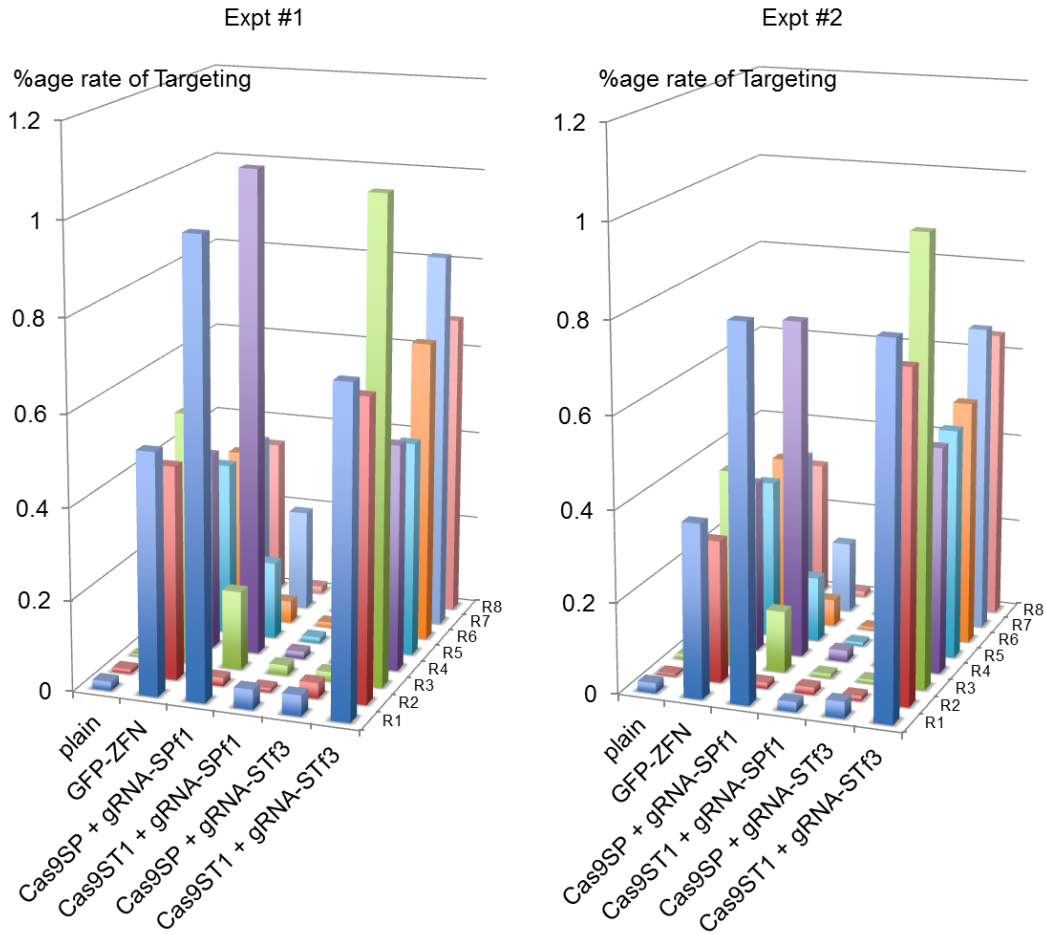

**Target Sites**

|                     |         |           |
|---------------------|---------|-----------|
| GTCCCCTCCACCCACAGTG | CGGGAAA | R1        |
| GTCCCCTCCACCCACAGTG | CAAAAAA | R2        |
| GTCCCCTCCACCCACAGTG | CGAGAAA | R3        |
| GTCCCCTCCACCCACAGTG | CGGAAAA | R4        |
| GTCCCCTCCACCCACAGTG | CAGAAAA | R5        |
| GTCCCCTCCACCCACAGTG | CGAAAAA | R6        |
| GTCCCCTCCACCCACAGTG | CAGGAAA | R7        |
| GTCCCCTCCACCCACAGTG | CAAGAAA | R8        |
| GTCCCCTCCACCCACAGTG | CRRRAAA | Consensus |

**Supplementary Figure 7** | Orthogonality arises primarily from sgRNAs, not PAMs. Both enzymes can target the same sequence for certain PAMs, demonstrating that specificity arises from orthogonal sgRNAs, not just orthogonal PAMs. Each data point is the average of three biological replicates.



**Supplementary Table 1** | List of plasmids available from Addgene.

| <b>Construct</b> | <b>Addgene ID</b> | <b>Description</b>                                       |
|------------------|-------------------|----------------------------------------------------------|
| DS-SPcas         | 48645             | Bacterial SP Cas9 expression                             |
| DS-NMcas         | 48646             | Bacterial NM Cas9 expression                             |
| DS-ST1cas        | 48647             | Bacterial ST1 Cas9 expression                            |
| DS-TDcas         | 48648             | Bacterial TD Cas9 expression                             |
| PM-SP!TA         | 48649             | Expresses crRNA targeting SP to protospacer A            |
| PM-SP!TB         | 48650             | Expresses crRNA targeting SP to protospacer B            |
| PM-NM!TA         | 48651             | Expresses crRNA targeting NM to protospacer A            |
| PM-NM!TB         | 48652             | Expresses crRNA targeting NM to protospacer B            |
| PM-ST1!TA        | 48653             | Expresses crRNA targeting ST1 to protospacer A           |
| PM-ST1!TB        | 48654             | Expresses crRNA targeting ST1 to protospacer B           |
| PM-TD!TA         | 48655             | Expresses crRNA targeting TD to protospacer A            |
| PM-TD!TB         | 48656             | Expresses crRNA targeting TD protospacer B               |
| DS-SPcasN-       | 48657             | Bacterial nuclease-null SP Cas9 expression               |
| DS-NMcasN-       | 48658             | Bacterial nuclease-null NM Cas9 expression               |
| DS-ST1casN-      | 48659             | Bacterial nuclease-null ST1 Cas9 expression              |
| DS-TDcasN-       | 48660             | Bacterial nuclease-null TD Cas9 expression               |
| SK-YFP-SPNM-B    | 48661             | Bacterial SP and NM reporter: protospacer B              |
| SK-YFP-ST1-B     | 48662             | Bacterial ST1 reporter: protospacer B                    |
| SK-YFP-TD-B      | 48663             | Bacterial TD reporter: protospacer B                     |
| SK-YFP-NM-A      | 48664             | Bacterial NM reporter: protospacer A                     |
| SK-YFP-ST1-A     | 48665             | Bacterial ST1 reporter: protospacer A                    |
| SK-YFP-TD-A      | 48666             | Bacterial TD reporter: protospacer A                     |
| EE-SP!gIII       | 48667             | Bacterial SP Cas9 targeted to filamentous phage gene III |
| M-SPCas          | 48668             | Mammalian SP Cas9 expression                             |
| M-ST1Cas         | 48669             | Mammalian ST1 Cas9 expression                            |
| M-NMCas          | 48670             | Mammalian NM Cas9 expression                             |
| M-SPm-sgRNA      | 48671             | Mammalian SP sgRNA SPm                                   |
| M-ST1-sgRNA      | 48672             | Mammalian ST1 sgRNA STm1                                 |
| M-NM-sgRNA       | 48673             | Mammalian NM sgRNA NMm1                                  |
| M-SPn-VP64       | 48674             | Mammalian nuclease-null SP-VP64 expression               |
| M-ST1n-VP64      | 48675             | Mammalian nuclease-null ST1-VP64 expression              |
| M-NMn-VP64       | 48676             | Mammalian nuclease-null NM-VP64 expression               |
| M-tdTom-SP       | 48677             | Mammalian activation reporter: SP PAM                    |
| M-tdTom-ST1      | 48678             | Mammalian activation reporter: ST1 PAM                   |
| M-tdTom-NM       | 48679             | Mammalian activation reporter: NM PAM                    |

## Supplementary Table 2 | sgRNA sequence designs for SP, ST1, and NM.

|                 |                                                                                                                                                                   |
|-----------------|-------------------------------------------------------------------------------------------------------------------------------------------------------------------|
| SP_chimera_trnc | GUUUUAGAGCUAGAAAUAGCAAGUUAAAA<br>UAAGGCUAGUCCGUUAUCAACUUGAAAAAGUGGCACCGAGUCGGUGCUUUUUU<br>GUUUUAGAGCUAUGCUGUUUUGAAUGGUCCCAAAAC                                    |
| SP_chimera_full | GAAAUUGUUGGAACCAUUCAAAACAGCAUAGCAAGUUAAAAUAAGGCUAGUCCGUUAUCAACUUGA<br>AAAAGUGGCACCGAGUCGGUGCUUUUUU                                                                |
| SP_gRNA_f1      | GTCCCCTCCACCCACAGTG GTTTTAGAGCTATGCTGTTTTGAATGGTCCCAAAAC<br>GAAATTGTTGGAACCATTCAAAACAGCATAGCAAGTTAAAAAATAAGGCTAGTCCGTTATCAACTTGA<br>AAAAGTGGCACCGAGTCCGGTGCTTTTTT |
| ST_chimera_trnc | GUUUUUGUACUCUCAGAAAUGCAGAAGCUACAAA<br>GAUAAGGCUUCAUGCCGAAAUCAACACCCUGUCAUUUUUAUGGCAGGGUGUU<br>GUUUUUGUACUCUCAAGAUUUUAAGUAACUGUACAAC                               |
| ST_chimera_full | GAAACUUACACAGUUACUAAAUCUUGCAGAAGCUACAAAAGAUAAAGGCUUCAUGCCGAAAUCAACA<br>CCCUGUCAUUUUUAUGGCAGGGUGUU                                                                 |
| ST_gRNA_t1      | GTCCCCTCCACCCACAGTG GTTTTGTACTCTCAGAAATGCAGAAGCTACAAA<br>GATAAGGCTTCATGCCGAAATCAACACCCTGTCATTTTATGGCAGGGTGTTTTTTT                                                 |
| ST_gRNA_t2      | GTCCCCTCCACCCACAGTG GTTTTGTACTCTCAGAAATGCAGAAGCTTCAAA<br>GATAAGGCTTCATGCCGAAATCAACACCCTGTCATTTTATGGCAGGGTGTTTTTTT                                                 |
| ST_gRNA_t3      | GTCCCCTCCACCCACAGTG GTTTTGTACTCTCAGAAATGCAGAAGCTACAAA<br>GATAAGGCTTCATGCCGAAATCAACACCCTGTCATTTTATGGCAGGGTGTTTTTTT                                                 |
| ST_gRNA_t4      | GTCCCCTCCACCCACAGTG GTTTTGTACTCTCAGAAATGCAGAAGCTACAAA<br>GATAAGGCTTCATGCCGAAATCAACACCCTGTCATTTTATGGCAGGGTGTTTTTTT                                                 |
| ST_gRNA_t5      | GTCCCCTCCACCCACAGTG GTTTTGTACTCTGAAAAGAAGCTACAAA<br>GATAAGGCTTCATGCCGAAATCAACACCCTGTCATTTTATGGCAGGGTGTTTTTTT                                                      |
| ST_gRNA_t6      | GTCCCCTCCACCCACAGTG GTTTTGTACTCTGAAAAGAAGCTTCAAA<br>GATAAGGCTTCATGCCGAAATCAACACCCTGTCATTTTATGGCAGGGTGTTTTTTT                                                      |
| ST_gRNA_t7      | GTCCCCTCCACCCACAGTG GTTTTGTACTCTGAAAAGAAGCTACAAA<br>GATAAGGCTTCATGCCGAAATCAACACCCTGTCATTTTATGGCAGGGTGTTTTTTT                                                      |
| ST_gRNA_t8      | GTCCCCTCCACCCACAGTG GTTTTGTACTCTGAAAAGAAGCTACAAA<br>GATAAGGCTTCATGCCGAAATCAACACCCTGTCATTTTATGGCAGGGTGTTTTTTT                                                      |
| ST_gRNA_f1      | GTCCCCTCCACCCACAGTG GTTTTGTACTCTCAAGATTTAAGTAACTGTACAAC<br>GAAACTTACACAGTTACTTAAATCTTGCAGAAGCTACAAAAGATAAGGCTTCATGCCGAAATCAACA<br>CCCTGTCATTTTATGGCAGGGTGTTTTTTT  |
| ST_gRNA_f2      | GTCCCCTCCACCCACAGTG GTTTTGTACTCTCAAGATTTAAGTAACTGTACAAC<br>GAAACTTACACAGTTACTTAAATCTTGCAGAAGCTTCAAAAGATAAGGCTTCATGCCGAAATCAACA<br>CCCTGTCATTTTATGGCAGGGTGTTTTTTT  |
| ST_gRNA_f3      | GTCCCCTCCACCCACAGTG GTTTTGTACTCTCAAGATTTAAGTAACTGTACAAC<br>GAAACTTACACAGTTACTTAAATCTTGCAGAAGCTACAAAAGATAAGGCTTCATGCCGAAATCAACA<br>CCCTGTCATTTTATGGCAGGGTGTTTTTTT  |
| ST_gRNA_f4      | GTCCCCTCCACCCACAGTG GTTTTGTACTCTCAAGATTTAAGTAACTGTACAAC<br>GAAACTTACACAGTTACTTAAATCTTGCAGAAGCTACAAAAGATAAGGCTTCATGCCGAAATCAACA<br>CCCTGTCATTTTATGGCAGGGTGTTTTTTT  |

NM\_chimera\_trnc GUUGUAGCUCUUUCUCGAAAAGAGAACCGUUGCUACAAU  
AAGGCCGUCUGAAAAGAUGUGCCGCAACGCUCUGCCCUUAAAAGCUUCUGCUUUAAAGGGGC

NM\_chimera\_full GUUGUAGCUCUUUCUCAUUUCGCAGUGCUACAAU  
GAAA AUUGUCGCACUGCGAAAUGAGAACCGUUGCUACAAU AAGGCCGUCUGAAAAGAUGUGCCG  
CAACGCUCUGCCCUUAAAAGCUUCUGCUUUAAAGGGGC

NM\_gRNA\_t1 GTCCCCTCCACCCACAGTG GTTGTAGCTCCCTTTCTCGAAAGAGAACCGTTGCTACAAT  
AAGGCCGTCTGAAAAGATGTGCCGCAACGCTCTGCCCTTAAAGCTTCTGCTTTAACGGGCTTT  
TTTT

NM\_gRNA\_t2 GTCCCCTCCACCCACAGTG GTTGTAGCTCCCTTTCTCGAAAGAGAACCGTTGCTACAAT  
AAGGCCGTCTGAAAAGATGTGCCGCAACGCTCTGCCCTTAAAGCTTCTGCTTTAACGGGCTTT  
TTTT

NM\_gRNA\_t3 GTCCCCTCCACCCACAGTG GTTGTAGCTCCCGAAACGTTGCTACAAT  
AAGGCCGTCTGAAAAGATGTGCCGCAACGCTCTGCCCTTAAAGCTTCTGCTTTAACGGGCTTT  
TTTT

NM\_gRNA\_f1 GTCCCCTCCACCCACAGTG GTTGTAGCTCCCTTTCTCATTTTCGAGTGCTACAAT  
GAAAATTGTGCGACTGCGAAATGAGAACCGTTGCTACAATAAGGCCGTCTGAAAAGATGTGCCG  
CAACGCTCTGCCCTTAAAGCTTCTGCTTTAAGGGGCTTTTTTT

**FINAL gRNA LIST (ordered as gBlocks)**

SP\_gRNA\_t1 TGTACAAAAAGCAGGCTTTAAAGGAACCAATTCAGTCGACTGGATCCGGTACCAAGGTCGGGC  
AGGAAGAGGGCCTATTTCCCATGATTCCTTCATATTTGCATATACGATACAAGGCTGTTAGAGA  
GATAATTAGAATTAATTTGACTGTAAACACAAAGATATTAGTACAAAATACGTGACGTAGAAAG  
TAATAATTTCTTGGGTAGTTTGCAGTTTTAAAATTATGTTTTAAAATGGACTATCATATGCTTA  
CCGTAACCTGAAAGTATTTTCGATTTCTTGGCTTTATATATCTTGTGGAAAGGACGAAACACC  
GTCCCCTCCACCCACAGTG  
GTTTTAGAGCTAGAAAATAGCAAGTTAAAATAAGGCTAGTCCGTTATCAACTTGAAAAGTGGCA  
CCGAGTCGGTGCTTTTTT CTAGACCCAGCTTTCTTGTACAAAGTTGGCATT

ST\_gRNA\_t1 TGTACAAAAAGCAGGCTTTAAAGGAACCAATTCAGTCGACTGGATCCGGTACCAAGGTCGGGC  
AGGAAGAGGGCCTATTTCCCATGATTCCTTCATATTTGCATATACGATACAAGGCTGTTAGAGA  
GATAATTAGAATTAATTTGACTGTAAACACAAAGATATTAGTACAAAATACGTGACGTAGAAAG  
TAATAATTTCTTGGGTAGTTTGCAGTTTTAAAATTATGTTTTAAAATGGACTATCATATGCTTA  
CCGTAACCTGAAAGTATTTTCGATTTCTTGGCTTTATATATCTTGTGGAAAGGACGAAACACC  
GTCCCCTCCACCCACAGTG  
GTTTTGTACTCTCAGAAATGCAGAAGCTACAAAGATAAGGCTTCATGCCGAAATCAACACCCCT  
GTCATTTTATGGCAGGGTGTTTTTTT CTAGACCCAGCTTTCTTGTACAAAGTTGGCATT

ST\_gRNA\_t2 TGTACAAAAAGCAGGCTTTAAAGGAACCAATTCAGTCGACTGGATCCGGTACCAAGGTCGGGC  
AGGAAGAGGGCCTATTTCCCATGATTCCTTCATATTTGCATATACGATACAAGGCTGTTAGAGA  
GATAATTAGAATTAATTTGACTGTAAACACAAAGATATTAGTACAAAATACGTGACGTAGAAAG  
TAATAATTTCTTGGGTAGTTTGCAGTTTTAAAATTATGTTTTAAAATGGACTATCATATGCTTA  
CCGTAACCTGAAAGTATTTTCGATTTCTTGGCTTTATATATCTTGTGGAAAGGACGAAACACC  
GTCCCCTCCACCCACAGTG  
GTTTTAGTACTCTCAGAAATGCAGAAGCTTCAAAGATAAGGCTTCATGCCGAAATCAACACCCCT  
GTCATTTTATGGCAGGGTGTTTTTTT CTAGACCCAGCTTTCTTGTACAAAGTTGGCATT

ST\_gRNA\_t3  
TGTACAAAAAAGCAGGCTTTAAAGGAACCAATTCAGTCGACTGGATCCGGTACCAAGGTCGGGC  
AGGAAGAGGGCCTATTTCCCATGATTCCTTCATATTTGCATATACGATACAAGGCTGTTAGAGA  
GATAATTAGAATTAATTTGACTGTAAACACAAAGATATTAGTACAAAATACGTGACGTAGAAAAG  
TAATAATTTCTTGGGTAGTTTGCAGTTTTAAAATTATGTTTTAAAATGGACTATCATATGCTTA  
CCGTAACCTGAAAGTATTTTCGATTTCTTGGCTTTATATATCTTGTGGAAAGGACGAAACACC  
GTCCCCTCCACCCACAGTG  
GTTTGTGTA CTCTCAGAAATGCAGAAGCTACAAAGATAAGGCTTCATGCCGAAATCAACACCCCT  
GTCATTTTATGGCAGGGTGTTTTTTT CTAGACCCAGCTTTCTTGTACAAAGTTGGCATT

ST\_gRNA\_t4  
TGTACAAAAAAGCAGGCTTTAAAGGAACCAATTCAGTCGACTGGATCCGGTACCAAGGTCGGGC  
AGGAAGAGGGCCTATTTCCCATGATTCCTTCATATTTGCATATACGATACAAGGCTGTTAGAGA  
GATAATTAGAATTAATTTGACTGTAAACACAAAGATATTAGTACAAAATACGTGACGTAGAAAAG  
TAATAATTTCTTGGGTAGTTTGCAGTTTTAAAATTATGTTTTAAAATGGACTATCATATGCTTA  
CCGTAACCTGAAAGTATTTTCGATTTCTTGGCTTTATATATCTTGTGGAAAGGACGAAACACC  
GTCCCCTCCACCCACAGTG  
GTTTATGTA CTCTCAGAAATGCAGAAGCTACAAAGATAAGGCTTCATGCCGAAATCAACACCCCT  
GTCATTTTATGGCAGGGTGTTTTTTT CTAGACCCAGCTTTCTTGTACAAAGTTGGCATT

ST\_gRNA\_t5  
TGTACAAAAAAGCAGGCTTTAAAGGAACCAATTCAGTCGACTGGATCCGGTACCAAGGTCGGGC  
AGGAAGAGGGCCTATTTCCCATGATTCCTTCATATTTGCATATACGATACAAGGCTGTTAGAGA  
GATAATTAGAATTAATTTGACTGTAAACACAAAGATATTAGTACAAAATACGTGACGTAGAAAAG  
TAATAATTTCTTGGGTAGTTTGCAGTTTTAAAATTATGTTTTAAAATGGACTATCATATGCTTA  
CCGTAACCTGAAAGTATTTTCGATTTCTTGGCTTTATATATCTTGTGGAAAGGACGAAACACC  
GTCCCCTCCACCCACAGTG  
GTTTTTGTACTCTGAAAAGAAGCTACAAAGATAAGGCTTCATGCCGAAATCAACACCCCTGTCAT  
TTTATGGCAGGGTGTTTTTTT CTAGACCCAGCTTTCTTGTACAAAGTTGGCATT

ST\_gRNA\_t6  
TGTACAAAAAAGCAGGCTTTAAAGGAACCAATTCAGTCGACTGGATCCGGTACCAAGGTCGGGC  
AGGAAGAGGGCCTATTTCCCATGATTCCTTCATATTTGCATATACGATACAAGGCTGTTAGAGA  
GATAATTAGAATTAATTTGACTGTAAACACAAAGATATTAGTACAAAATACGTGACGTAGAAAAG  
TAATAATTTCTTGGGTAGTTTGCAGTTTTAAAATTATGTTTTAAAATGGACTATCATATGCTTA  
CCGTAACCTGAAAGTATTTTCGATTTCTTGGCTTTATATATCTTGTGGAAAGGACGAAACACC  
GTCCCCTCCACCCACAGTG  
GTTTTAGTACTCTGAAAAGAAGCTTCAAAGATAAGGCTTCATGCCGAAATCAACACCCCTGTCAT  
TTTATGGCAGGGTGTTTTTTT CTAGACCCAGCTTTCTTGTACAAAGTTGGCATT

ST\_gRNA\_t7  
TGTACAAAAAAGCAGGCTTTAAAGGAACCAATTCAGTCGACTGGATCCGGTACCAAGGTCGGGC  
AGGAAGAGGGCCTATTTCCCATGATTCCTTCATATTTGCATATACGATACAAGGCTGTTAGAGA  
GATAATTAGAATTAATTTGACTGTAAACACAAAGATATTAGTACAAAATACGTGACGTAGAAAAG  
TAATAATTTCTTGGGTAGTTTGCAGTTTTAAAATTATGTTTTAAAATGGACTATCATATGCTTA  
CCGTAACCTGAAAGTATTTTCGATTTCTTGGCTTTATATATCTTGTGGAAAGGACGAAACACC  
GTCCCCTCCACCCACAGTG  
GTTTGTGTA CTCTGAAAAGAAGCTACAAAGATAAGGCTTCATGCCGAAATCAACACCCCTGTCAT  
TTTATGGCAGGGTGTTTTTTT CTAGACCCAGCTTTCTTGTACAAAGTTGGCATT

ST\_gRNA\_t8  
TGTACAAAAAAGCAGGCTTTAAAGGAACCAATTCAGTCGACTGGATCCGGTACCAAGGTCGGGC  
AGGAAGAGGGCCTATTTCCCATGATTCCTTCATATTTGCATATACGATACAAGGCTGTTAGAGA  
GATAATTAGAATTAATTTGACTGTAAACACAAAGATATTAGTACAAAATACGTGACGTAGAAAAG  
TAATAATTTCTTGGGTAGTTTGCAGTTTTAAAATTATGTTTTAAAATGGACTATCATATGCTTA  
CCGTAACCTTGAAAGTATTTTCGATTTCTTGGCTTTATATATCTTGTGGAAAGGACGAAACACC  
**GTCCCCTCCACCCACAGTG**  
**GTTTATGTACTCTGAAAAGAAGCTACAAAGATAAGGCTTCATGCCGAAATCAACACCCGTGCAT**  
**TTTATGGCAGGGTGTTTTTTT CTAGACCCAGCTTTCTTGTACAAAGTTGGCATT**

NM\_gRNA\_t1  
TGTACAAAAAAGCAGGCTTTAAAGGAACCAATTCAGTCGACTGGATCCGGTACCAAGGTCGGGC  
AGGAAGAGGGCCTATTTCCCATGATTCCTTCATATTTGCATATACGATACAAGGCTGTTAGAGA  
GATAATTAGAATTAATTTGACTGTAAACACAAAGATATTAGTACAAAATACGTGACGTAGAAAAG  
TAATAATTTCTTGGGTAGTTTGCAGTTTTAAAATTATGTTTTAAAATGGACTATCATATGCTTA  
CCGTAACCTTGAAAGTATTTTCGATTTCTTGGCTTTATATATCTTGTGGAAAGGACGAAACACC  
**GTCCCCTCCACCCACAGTG**  
**GTTGTAGCTCCCTTTCTCGAAAGAGAACCGTTGCTACAATAAGGCCGTCTGAAAAGATGTGCCG**  
**CAACGCTCTGCCCTTAAAGCTTCTGCTTTAACGGGCTTTTTTT**  
**CTAGACCCAGCTTTCTTGTACAAAGTTGGCATT**

NM\_gRNA\_t2  
TGTACAAAAAAGCAGGCTTTAAAGGAACCAATTCAGTCGACTGGATCCGGTACCAAGGTCGGGC  
AGGAAGAGGGCCTATTTCCCATGATTCCTTCATATTTGCATATACGATACAAGGCTGTTAGAGA  
GATAATTAGAATTAATTTGACTGTAAACACAAAGATATTAGTACAAAATACGTGACGTAGAAAAG  
TAATAATTTCTTGGGTAGTTTGCAGTTTTAAAATTATGTTTTAAAATGGACTATCATATGCTTA  
CCGTAACCTTGAAAGTATTTTCGATTTCTTGGCTTTATATATCTTGTGGAAAGGACGAAACACC  
**GTCCCCTCCACCCACAGTG**  
**GTTGTAGCTCCCTTTCTGAAAGAACCGTTGCTACAATAAGGCCGTCTGAAAAGATGTGCCGCAAC**  
**GCTCTGCCCTTAAAGCTTCTGCTTTAACGGGCTTTTTTT**  
**CTAGACCCAGCTTTCTTGTACAAAGTTGGCATT**

NM\_gRNA\_t3  
TGTACAAAAAAGCAGGCTTTAAAGGAACCAATTCAGTCGACTGGATCCGGTACCAAGGTCGGGC  
AGGAAGAGGGCCTATTTCCCATGATTCCTTCATATTTGCATATACGATACAAGGCTGTTAGAGA  
GATAATTAGAATTAATTTGACTGTAAACACAAAGATATTAGTACAAAATACGTGACGTAGAAAAG  
TAATAATTTCTTGGGTAGTTTGCAGTTTTAAAATTATGTTTTAAAATGGACTATCATATGCTTA  
CCGTAACCTTGAAAGTATTTTCGATTTCTTGGCTTTATATATCTTGTGGAAAGGACGAAACACC  
**GTCCCCTCCACCCACAGTG**  
**GTTGTAGCTCCCGAACGTTGCTACAATAAGGCCGTCTGAAAAGATGTGCCGCAACGCTCTGCC**  
**CCTTAAAGCTTCTGCTTTAACGGGCTTTTTTT**  
**CTAGACCCAGCTTTCTTGTACAAAGTTGGCATT**

SP\_gRNA\_f1  
TGTACAAAAAAGCAGGCTTTAAAGGAACCAATTCAGTCGACTGGATCCGGTACCAAGGTCGGGC  
AGGAAGAGGGCCTATTTCCCATGATTCCTTCATATTTGCATATACGATACAAGGCTGTTAGAGA  
GATAATTAGAATTAATTTGACTGTAAACACAAAGATATTAGTACAAAATACGTGACGTAGAAAAG  
TAATAATTTCTTGGGTAGTTTGCAGTTTTAAAATTATGTTTTAAAATGGACTATCATATGCTTA  
CCGTAACCTTGAAAGTATTTTCGATTTCTTGGCTTTATATATCTTGTGGAAAGGACGAAACACC  
**GTCCCCTCCACCCACAGTG**  
**GTTTTAGAGCTATGCTGTTTTGAATGGTCCCAAAACGAAATTGTTGGAACCATTCAAAACAGCA**  
**TAGCAAGTTAAATAAGGCTAGTCCGTTATCAACTTGAAAAAGTGGCACCGAGTCGGTGCTTTT**  
**TT CTAGACCCAGCTTTCTTGTACAAAGTTGGCATT**

ST\_gRNA\_f1

TGTACAAAAAGCAGGCTTTAAAGGAACCAATTCAGTCGACTGGATCCGGTACCAAGGTCGGGC  
AGGAAGAGGGCCTATTTCCCATGATTCCTTCATATTTGCATATACGATACAAGGCTGTTAGAGA  
GATAATTAGAATTAATTTGACTGTAAACACAAAGATATTAGTACAAAATACGTGACGTAGAAAAG  
TAATAATTTCTTGGGTAGTTTGCAGTTTTAAAATTATGTTTTAAAATGGACTATCATATGCTTA  
CCGTAACCTGAAAGTATTTTCGATTTCTTGGCTTTATATATCTTGTGGAAAGGACGAAACACC  
**GTCCCCTCCACCCACAGTG**  
**GTTTTGTACTCTCAAGATTTAAGTAACTGTACAACGAAACTTACACAGTTACTTAAATCTTGC**  
**AGAAGCTACAAAGATAAGGCTTCATGCCGAAATCAACACCCTGTCATTTTTATGGCAGGGTGT**  
**TTTT CTAGACCCAGCTTTCTTGTACAAAGTTGGCATT**

ST\_gRNA\_f2

TGTACAAAAAGCAGGCTTTAAAGGAACCAATTCAGTCGACTGGATCCGGTACCAAGGTCGGGC  
AGGAAGAGGGCCTATTTCCCATGATTCCTTCATATTTGCATATACGATACAAGGCTGTTAGAGA  
GATAATTAGAATTAATTTGACTGTAAACACAAAGATATTAGTACAAAATACGTGACGTAGAAAAG  
TAATAATTTCTTGGGTAGTTTGCAGTTTTAAAATTATGTTTTAAAATGGACTATCATATGCTTA  
CCGTAACCTGAAAGTATTTTCGATTTCTTGGCTTTATATATCTTGTGGAAAGGACGAAACACC  
**GTCCCCTCCACCCACAGTG**  
**GTTTTAGTACTCTCAAGATTTAAGTAACTGTACAACGAAACTTACACAGTTACTTAAATCTTGC**  
**AGAAGCTTCAAAGATAAGGCTTCATGCCGAAATCAACACCCTGTCATTTTTATGGCAGGGTGT**  
**TTTT CTAGACCCAGCTTTCTTGTACAAAGTTGGCATT**

ST\_gRNA\_f3

TGTACAAAAAGCAGGCTTTAAAGGAACCAATTCAGTCGACTGGATCCGGTACCAAGGTCGGGC  
AGGAAGAGGGCCTATTTCCCATGATTCCTTCATATTTGCATATACGATACAAGGCTGTTAGAGA  
GATAATTAGAATTAATTTGACTGTAAACACAAAGATATTAGTACAAAATACGTGACGTAGAAAAG  
TAATAATTTCTTGGGTAGTTTGCAGTTTTAAAATTATGTTTTAAAATGGACTATCATATGCTTA  
CCGTAACCTGAAAGTATTTTCGATTTCTTGGCTTTATATATCTTGTGGAAAGGACGAAACACC  
**GTCCCCTCCACCCACAGTG**  
**GTTTGTGACTCTCAAGATTTAAGTAACTGTACAACGAAACTTACACAGTTACTTAAATCTTGC**  
**AGAAGCTACAAAGATAAGGCTTCATGCCGAAATCAACACCCTGTCATTTTTATGGCAGGGTGT**  
**TTTT CTAGACCCAGCTTTCTTGTACAAAGTTGGCATT**

ST\_gRNA\_f4

TGTACAAAAAGCAGGCTTTAAAGGAACCAATTCAGTCGACTGGATCCGGTACCAAGGTCGGGC  
AGGAAGAGGGCCTATTTCCCATGATTCCTTCATATTTGCATATACGATACAAGGCTGTTAGAGA  
GATAATTAGAATTAATTTGACTGTAAACACAAAGATATTAGTACAAAATACGTGACGTAGAAAAG  
TAATAATTTCTTGGGTAGTTTGCAGTTTTAAAATTATGTTTTAAAATGGACTATCATATGCTTA  
CCGTAACCTGAAAGTATTTTCGATTTCTTGGCTTTATATATCTTGTGGAAAGGACGAAACACC  
**GTCCCCTCCACCCACAGTG**  
**GTTTATGACTCTCAAGATTTAAGTAACTGTACAACGAAACTTACACAGTTACTTAAATCTTGC**  
**AGAAGCTACAAAGATAAGGCTTCATGCCGAAATCAACACCCTGTCATTTTTATGGCAGGGTGT**  
**TTTT CTAGACCCAGCTTTCTTGTACAAAGTTGGCATT**

NM\_gRNA\_f1

TGTACAAAAAGCAGGCTTTAAAGGAACCAATTCAGTCGACTGGATCCGGTACCAAGGTCGGGC  
AGGAAGAGGGCCTATTTCCCATGATTCCTTCATATTTGCATATACGATACAAGGCTGTTAGAGA  
GATAATTAGAATTAATTTGACTGTAAACACAAAGATATTAGTACAAAATACGTGACGTAGAAAAG  
TAATAATTTCTTGGGTAGTTTGCAGTTTTAAAATTATGTTTTAAAATGGACTATCATATGCTTA  
CCGTAACCTGAAAGTATTTTCGATTTCTTGGCTTTATATATCTTGTGGAAAGGACGAAACACC  
**GTCCCCTCCACCCACAGTG**  
**GTTGTAGCTCCCTTTCTCATTTTCGAGTGCTACAATGAAAATTGTGCGACTGCGAAATGAGAAC**  
**CGTTGCTACAATAAGGCCGTCTGAAAAGATGTGCCGCAACGCTCTGCCCTTAAAGCTTCTGCT**  
**TTAAGGGCTTTTTTT CTAGACCCAGCTTTCTTGTACAAAGTTGGCATT**

### Supplementary Table 3 | Library amplification and sequencing primers.

Library amplification forward primers:

AATGATACGGCGACCACCGAGATCTACACCCTGCGGAAGCCGTTCTCGATGGACGAccgctttgacct  
agaattcatttac

AATGATACGGCGACCACCGAGATCTACACGGAAGGTAGGGAAGTAAAGTGGTGGATGTGgcttt  
gacctacatagcagaact

Library amplification reverse primers:

CAAGCAGAAGACGGCATAACGAGATATTACTCGGACGGACAGACGGGcctctagcacgcgt  
CAAGCAGAAGACGGCATAACGAGATTCCGGAGAGACGGACAGACGGGcctctagcacgcgt  
CAAGCAGAAGACGGCATAACGAGATCGCTCATTGACGGACAGACGGGcctctagcacgcgt  
CAAGCAGAAGACGGCATAACGAGATGAGATTCCGACGGACAGACGGGcctctagcacgcgt  
CAAGCAGAAGACGGCATAACGAGATATTCAGAAGACGGACAGACGGGcctctagcacgcgt  
CAAGCAGAAGACGGCATAACGAGATGAATTCGTGACGGACAGACGGGcctctagcacgcgt  
CAAGCAGAAGACGGCATAACGAGATCTGAAGCTGACGGACAGACGGGcctctagcacgcgt  
CAAGCAGAAGACGGCATAACGAGATTAATGCGCGACGGACAGACGGGcctctagcacgcgt  
CAAGCAGAAGACGGCATAACGAGATCGGCTATGGACGGACAGACGGGcctctagcacgcgt  
CAAGCAGAAGACGGCATAACGAGATTCCGCGAAGACGGACAGACGGGcctctagcacgcgt  
CAAGCAGAAGACGGCATAACGAGATTCTCGCGCGACGGACAGACGGGcctctagcacgcgt  
CAAGCAGAAGACGGCATAACGAGATAGCGATAGGACGGACAGACGGGcctctagcacgcgt

read 1 sequencing primers:

CCTGCGGAAGCCGTTCTCGATGGACGACCGCTTTGACCTAGAATTCATTTAC  
GGAAGGTAGGGAAGTAAAGTGGTGGATGTGgctttgacctacatagcagaact

read 2 sequencing primer:

seq\_primer\_r\_psp1\_psp2 GACGGACAGACGGGcctctagcacgcgt

index read sequencing primer:

seq\_primer\_index\_psp1\_psp2 acgcgtgctagaggcCGTCTGTCCGTC

## **Supplementary Note 1 | Depletion biases in Cas9 library experiments**

The library-based selection strategy employed for PAM-finding imposes apparent minimum and maximum fold depletion values. For sequences that are barely depleted, the noise in the transformation efficiency of the two libraries overwhelms the weak depletion signals. For sequences that are efficiently depleted, the fold depletion value is primarily determined by the very small number of survivors. In most cases, these are not due to authentic survival events in the face of Cas9 pressure. Rather, they are the result of low-frequency Cas9, tracrRNA, or crRNA mutations leading to Cas9 inactivation and consequent target escape. Consequently, any analysis of target-dependent activity differences should focus on moderately depleted sequences.

Because the PAM-finding selection was run overnight, surviving plasmids were forced to evade Cas9-mediated cutting for an extended period, resulting in a highly stringent selection capable of picking up subtle base preferences in the PAM recognition process. By the same token, high stringency may have caused it to miss differences between highly active PAM sequences. For example, our analysis found that NM Cas9 display high activity with PAMs of NNNNGANN, NNNNGTTN, and NNNNGNNT, all of which were depleted as efficiently as NNNNGATT (Figure 2D). While all of these PAMs are more than sufficient for effector cleavage, they may differ for other Cas9-mediated activities. In principle, such differences between highly active sequences can be detected using the depletion assay by modulating the selection stringency, e.g. by reducing the time from transformation to plasmid isolation for sequencing. Alternatively, they may be assayed in the context of the activity of interest.

Finally, our experiments were run using two different protospacers. The various Cas9 proteins differed in their average activity levels on these sequences, exhibiting nonlinear interactions between protospacer and PAM. Other protospacers may exhibit activity differences that could affect the functional PAM by rendering it either more or less stringent.



## Supplementary Note 2 | Expressing novel Cas9 orthologs in bacteria

Characterizing a new Cas9 ortholog is complicated by the requirement for tracrRNA, crRNA, and a PAM sequence downstream of the protospacer. Our sequencing-based library depletion method will empirically detail the required PAM, but still requires advance knowledge of the tracrRNA and crRNA and their directionality. These can normally be discovered by identifying the repeat sequences within the CRISPR locus and searching for a nearby sequence that is expected to base-pair with the repeat; this is normally the tracrRNA. Searching for promoters and terminators on either side of the CRISPR locus and tracrRNA usually suffices to identify directionality; in ambiguous cases, a comparison with existing repeats is often helpful. The entire tracrRNA cassette, including the native promoter and terminator, should be copied wholesale into the expression vector. If there are multiple terminators downstream and it is unclear precisely where the tracrRNA ends, it is safer to include all of them. To compensate for possible differences in promoter strength between the native species and *E. coli*, we prefer to clone the tracrRNA cassette downstream of the corresponding cas9 gene such that the two are polycistronic. In the event that there is a promoter within the tracrRNA cassette that would transcribe backwards towards cas9 (this is often the native cas9 promoter), we insert the lambda t1 terminator to mitigate transcription in that direction only. Of the orthologs characterized in this study, the lambda t1 terminator was only required for NM.

Producing a desired crRNA for PAM-finding simply requires insertion of the desired spacer sequence (ideally at least 20 bp) upstream of the repeat identified in the CRISPR locus. We have determined that there is no need to insert an additional repeat upstream of the spacer and none of the targeting plasmids used in this study feature such a design, but if it is done the spacing should match that of the native CRISPR locus. RNA secondary structures involving the spacer sequence should be minimized if at all possible.

### Supplementary Note 3| Sequences of cas9 genes for bacterial experiments.

In bacteria, the native coding sequence of SP was utilized for nuclease studies, while the human-optimized version was employed for transcriptional repression. ST<sub>1</sub>, NM, and TD utilized human-optimized genes for both.

#### >SPcas

```
ATGGATAAGAAATACTCAATAGGCTTAGATATCGGCACAAATAGCGTCGGATGGGCGGTGATCACTGATGAATATAAGGTTCCGCTCAAAAAGTTCA
AGGTTCTGGGAAATACAGACCGCCACAGTATCAAAAAAATCTTATAGGGGCTCTTTTATTTGACAGTGGAGAGACAGCGGAAGCGACTCGTCTCAA
ACGGACAGCTCGTAGAAGGTATACACGTCGGGAAGAATCGTATTTGTTATCTACAGGAGATTTTTTCAATGAGATGGCGAAAGTAGATGATAGTTTC
TTTCATCGACTTGAAGAGTCTTTTTTGGTGGAGAAGACAAGAAGCATGAACGTCATCCTATTTTTGGAAATATAGTAGATGAAGTTGCTTATCATG
AGAAATATCCAATCTATCTATCTGCGAAAAAATTTGGTAGATTCTACTGATAAAGCGGATTTGCGGTTAATCTATTTGGCCTTAGCGCATATGAT
TAAGTTTCGTTGGTCATTTTTTGGATTGAGGGAGATTTAAATCCTGATAATAGTATGTGGACAAACTATTTATCCAGTTGGTACAAACCTACAATCAA
TTATTGAGAAAAACCTATTAACGCAAGTGGAGTAGATGCTAAAGCGATTTCTTCGCACGATTGAGTAAATCAAGCATTAGAAAAATCTCAATG
CTCAGCTCCCCGGTGAGAAAGAAAAATGGCTTATTTGGGAATCTCATTGCTTTTGCATTTGGGTTTGACCCCTAATTTTTAAATCAAATTTTATTG
AGAAGATGCTAAATTACAGCTTTCAAAAGATACTTACGATGATGATTTAGATAATTTATTTGGCGCAAATTTGGAGATCAATATGCTGATTTGTTTTG
GCAGCTAAGAATTTATCAGATGCTATTTTACTTTTCAGATATCCTAAGAGTAAATACTGAAATAACTAAGGCTCCCCATCAGCTTCAATGATTAAC
GCTACGATGAACATCATCAAGACTTGACTCTTTTAAAGCTTTAGTTCGACAACTTCCAGAAAAGTATAAAGAAATCTTTTTGATCAATCAA
AAACGGATATGCAGGTTTATTTGATGGGGGAGCTAGCCAAGAAGAAATTTATAAATTTATCAAACCAATTTTAGAAAAATGGATGGTACTGAGGAA
TTATTGGTGAACATAATCGTGAAGATTTGCTGCGCAAGCAACGGACCTTTGACAACGGCTCTATTCCCATCAAATTCCTTGGGTGAGCTGCATG
CTATTTTGGAGAAGACAAGAAGACTTTTTATCCATTTTTTAAAGACAATCGTGAGAAGATTGAAAAAATCTTGACTTTTCGAATTCCTTATTATGTTGG
TCCATTTGGCGCGTGGCAATAGTCGTTTTGCATGGATGACTCGGAAGTCTGAAGAAACAATTTCCCATGGAATTTTGAAGAAGTTGTCGATAAAGGT
GCTTTCAGCTCAATCATTTTGAACGCAATTTGATAAAAAATTTCCCAATGAAAAAGTACTACCAAAACATAGTTTGCCTTTATGATGATGATTT
TTACGGTTTATAACGAATGACAAGGTCAAATATGTTACTGAAGGAATGCGAAAACAGCATTTCTTTCAGGTGAACAGAAGAAAGCCATTTGTTGA
TTACTCTTCAAACAATCGAAAAGTAACCGTTAAGCAATTTAAAGAAAGATTATTTCAAAAAATAGAATGTTTTGATAGTGTGAAATTTCAAGGA
GTTGAAGATAGATTTAATGCTTCATTAGGTACCTACCATGATTTGCTAAAAATTTATAAGATAAAGATTTTTTGGATAATGAAGAAATGAAGATA
TCTTAGAGGATATTTGTTTAACTTGAAGCTTATTTGAAGATAGGAGATGATTTGAGGAAAGACTTAAACATATGCTCACCTTTTGGATGATGAGG
GATGAAACAGCTTAAACGTCGCGCTTACTGGTTGGGGACGTTTGTCTCGAAAATGATTAATGGTATTAGGGATAAGCAATCTGGCAAAACAATA
TTAGATTTTTTGAATCAGATGTTTTGCCAATCGCAATTTTATGCACTGATCCATGATGATGATTTGACATTTAAAGAAAGACATTCAAAAAGCAC
AAGTGTCTGGCAAGCGGATAGTTTACATGAACATTTGCAAAATTTAGCTGGTAGCCCTGCTATTAATAAAGGATTTTTACAGACTGTAAAAGTTGT
TGATGAATTTGGTCAAAGTAAATGGGGCGGCATAAGCCAGAAAAATATCGTTATTTGAAATGGCACGCTGAAAATCAGACAACCTCAAAGGGCCAGAAAA
TCGCGAGAGCGTATGAACGAATCGAAGAAGGTATCAAAGAATTAGGAAGTCAAGATTTCTTAAAGAGCATCCTGTTGAAAATACTCAATTGCAAAATG
AAAAGCTCTATCTCTATATCTCCAAAATGGAAGAGACATGATGTGGACCAAGAATAGATATTAATCGTTTAAAGTATTATGATGTCGATCACAT
TGTTCCCAAAGTTTCTTAAAGACGATTTCAATAGACAATAAGGCTTTAACCGGTTCTGATAAAAAATCGTGGTAAATCGGATAACGTTCCAAGTGAA
GAAGTATGCAAAAAGATTGAAAACTATTGGAGACAACCTTCAAACGCCAAGTTAATCACTCAACGTAAGTTTGAATTTAACGAAAGCTGAACGTG
GAGGTTTGAAGTGAACCTGATAAAGCTGGTTTTATCAAACGCCAATTTGGTTGAAACTCGCCAAATCACTAAGCATGTGGCACAAATTTGGATAGTCCG
CATGAATACTAAATACGATGAAAATGATAAATTTATTCGAGAGGTTAAAGTGAATACCTTAAATCTAAATAGTTTCTGACTTCCGAAAAGATTTC
CAATCTATAAAGTACGTGAGATTAACAATTACCATCATGCCATGATGCGTATCTAAATGCCGTCGTTGGAAGTCTTTGATTAAGAAATATCCAA
AACTTGAATCGGAGTTTTGCTATGTTGATTTATAAAGTTTATGATGTTTCGTAATAATGATTTGCTAAGTCTGAGCAAGAAATAGGCAAAAGCAACCGCAAA
ATATTTCTTTTACTCTAATATCATGAACCTTCTCAAACAGAAATTACACTTGCAAAATGGAGAGATTCGCAAAACGCCCTCTAATCGAACTAATGGG
GAAACTGGAGAAATGCTCTGGGATAAAGGGCGAGATTTTGCCACAGTGGCAGAAATGATTTGTCATGCCCAAGTCAATATTGCAAGAAAACAGAAG
TACAGACAGGCGGATTTCCAAAGGATCAATTTTCCAAAAAGAAATTCGGACAAGCTTATTGCTCGTAAAAAAGACTGGGATCCAAAAAATATGG
TGTTTTGATAGTCCAACGGTAGCTTATTCAGTCTAGTGGTTGCTAAGTTGGAAAAAGGAAATCGAAGAAGTTAAATCCGTTAAAGAGTTACTA
GGGATCACAATTTAGGAAAGGTTCCTTTGAAAAAATCCGATTGACTTTTTAGAAAGCTAAAGGATATAAGGAAAGTTAAAAAAGACTTAATCATTAA
AATACCTAAATATAGTCTTTTGGAGTTAGAAAACGGTTCGTAACGGATGCTGGCTAGTGGCGGAGAATTACAAAAAGGAAATGAGCTGGCTCTGCC
AAGCAATATGTGAATTTTTTATATTAGTGTGATTTGAAAAGTTGAAGGGTAGTCCAGAAGATAACGAACAAAAACAATTTGTTTGGGAGCAG
CATAAGCATTATTTAGATGAGATTTATTGAGCAATCAGTGAATTTCTTAAGCGTGTATTTTTTTCAGATGCTCAATTTAGATGCTCAATTTGCTAGTGCAT
ATAACAACATAGAGACAAACCAATACGTGAACAAGCAGAAAAATTTATTCATTTATTTACGTTGACGAATCTTGGAGCTCCCGCTGCTTTTAAATA
TTTTGATACAACAATTTGATCGTAAACGATATACGCTCTACAAAAGAAGTTTTAGATGCCACTCTTATCCATCAATCCATCACTGGTCTTTATGAACA
CGCATTGATTTGAGTCAAGTCTAGGAGGTGACTGA
```

#### >SPcas<sub>m4</sub>

```
ATGGACAAGAAAGTACTCCATTTGGGCTCGCTATCGGCACAAACAGCGTCGGCTGGGCGCTCATTACGGACGAGTACAAGGTGCCGAGCAAAAAATTC
AAGTCTCTGGGCAATACCGATCGCCACAGCATAAAGAAGAACCTCATTGGCGCCCTCTGTTCGACTCCGGGGAGACGGCCGAAGCCACGCGGCTCAA
AAGAACAGCACGGCGCAGATATACCCGCAAGAAAGAAATCGGATCTGCTACTCTGACGAGAGATCTTTAGTAAATGAGATGGCTAAGGTGGATGACTCTTT
TTCCATAGGCTGGAGGAGTCTTTTTTGGTGGAGGAGGATAAAAAGCACGAGCGCCACCCAATCTTTGGCAATATCGTGGACGAGGTGGCGTACCATG
AAAAGTACCCAACCATATATCTATCTGAGGAAGAAGCTTGTAGACAGTACTGATAAGGCTGACTTGGGTTGATCTATCTCGGCTGGCGCATATGAT
CAAATTTCCGGGACACTTCTCATCGAGGGGACCTGAACCCAGACAACAGCGATGTCGACAAACTTTTATCCAATGGTTTCAAGACTTACAATCAG
CTTTTTCGAAGAGAACCAGATCAACGCTCCGGAGTTGACGCCAAAGAAATCCTGAGCGCTAGGCTGTCCAAATCCCGCGGCTGCAAAACCTCATCG
CACAGCTCCCTGGGGAGAAGAAGACGGCCTGTTGGTAACTTATCGCCCTGTCACCTCGGGCTGACCCCAACTTTAAATCTAACTTCGACCTGGC
CGAAGATGCCAAGCTTCAACTGAGCAAAAGACACCTACGATGATGATCTCGACAATCTGCTGGCCAGATCGGCGACAGTACGCAGACCTTTTTTTG
CGGGCAAGAACCTGTGACAGCCATTTCTGCTGAGTATTTCTGCGAGTGAACACGGAGATCACCAGCTCCGCTGAGCGCTAGTATGATCAAGC
GCTATGATGAGCACCAACCAAGACTTGACTTTGCTGAAGGCCCTTGTGACAGACGCAACTCTGAGGCGTGGCTGAGAAAGTACAGGAAATTTCTTCGATCAGTCAA
AAATGGCTACGCCGATACATTGACGGCGGAGCAAGCCAGGAGGAATTTACAAATTTATTAAGCCATCTTGGAAAAATGGACGGCACCGAGGAG
CTGCTGGTAAAGCTTAAACAGAGAAGATCTGTTGCGCAAAACAGCGCATTTTCGACAATGGAAGCATCCCCACAGATTCACCTGGGGCACTGCACG
```

CTATCCTCAGCGGCAAGAGGATTTCTACCCCTTTTGAAGATAACAGGGAAAGATTGAGAAAATCCTCACATTTCCGGATACCCCTACTATGTAGG  
CCCCCTCGCCCGGGAAATTCAGATTTCGCGTGGATGACTCGCAAATCAGAAGAGACCATCACTCCCTGGAACCTTCGAGGAAGTCTGGATAGAGGG  
GCCTCTGCCCGAGTCTCATCGAAAGGATGACTAACTTTGATAAAAACTTGCCTACCGAAAGGTGCTTCCCTAAACACTCTCTGCTGACGATGACT  
TCACAGTTTATAACGAGCTCACCAAGGTCAAATACGTCACAGAAAGGATGAGAAAGCCAGCATTCCTGTCTGGAGAGCAGAAGAAAGCTATCCTGGA  
CCTCCTCTCAAGACGAACCGGAAAGTTACCGTGAAACAGCTCAAAGAAGACTATTTCAAAAAGATTGAATGTTTCGACTCTGTTGAAATCAGCGGA  
GTGGAGGATCGCTTCAACGCATCCCTGGGAACGATACAGTATCCTGAAAATCATTAAGACAAGGACTTCCCTGGACAATGAGGAGAACGAGGACA  
TTCTTGAGGACATGTTCTCACCCTACGTTGTTGAAAGTAGGGAGATTGATGAAGAACGCTTGAAAAATACGCTCATCTCTCGACGACAAAGT  
CATGAAACAGCTCAAGAGGCGCGATATACAGGATGGGGCGGCTGTCAAGAAACTGATCAATGGGATCCGAGCAAGCAGAGTGGAAAGACAATC  
CTGGATTTTCTTAAGTCCGATGGATTTGCCAACCGGAACTTCAATGCAGTTGATCCATGATGACTCTCTCACCTTTAAGGAGGACATCCAGAAAGCAC  
AAGTTTCTGGCCAGGGGACAGTCTTACAGGACACATCGCTAATCTTGCAGGTAGCCAGCTATCAAAAAGGGAATCTGCAGACCGTTAAGGTCGT  
GGATGAACCTGTCAAAGTAATGGGAAGGCATAAGCCCGAGAATATCGTTATCGAGATGGCCGAGAGAACCACACTCCAGAGGGAAGGACAGAAAG  
AGTAGGGAAAGGATGAAGAGGTTGAAGAGGGTATAAAAAGCAACTGGGTCCTCAAAATCCTTAAGGAACACCCAGTTGAAAACACCCGACTTCAAGATG  
AGAAGCTTACCTGTACTACCTGCAGAACGGCAGGGACATGTACGTGGATCAGGAACGGACATCAATCGGCTCTCCGACTACGACGTGGCTGCTAT  
CGTGCCCCAGTCTTTTCAAGATGATCTATGATAATAAAGTGTGACAGATCCGATAAAGCTAGAGGGGAAGAGTGATAACGTCCTCCCTCAGAA  
GAAGTTGTCAGAAAAATGAAAAATTTATGGCGGCGAGTGTGACGCCAACTGATCACACAACGGAGTTCGATAATCTGACTAAGGCTGAACGAG  
GTGGCTGTCTGAGTTGATAAAGCGGCTTTCATCAAAGCGGACTTTCAGAACGCGCAGATCACCAAGCACCTGAGGCGCCCTGACTTCAAGTTCAGC  
CATGAACACCAAGTACGATGAAAATGACAACTGATTCGAGAGGTGAAAGTTATTACTCTGAAGTCTAAGCTGGTCTCAGATTTCAAGAAAGGACTTT  
CAGTTTTATAAGGTGAGAGAGATCAACAATTACCACCATGCGCATGATGCCTACCTGAATGCAAGTGGTAGGCACTGCATTTCAAAAAATATCCCA  
AGCTTGAATCTGAATTTGTTTACGGAGACTATAAAGTGTACGATGTTAGGAAAATGATCGCAAAGTCTGAGCAGGAAAATAGGCAAGGCCACCGCTAA  
GTACTTCTTTTACAGCAATATTATGAATTTTTTCAAGAACGAGATTACACTGGCCAAATGGAGAGATTCCGAAAGCACCCTTATCGAAACAACAGGA  
GAAACAGGAGAAAATCGTGTGGGACAAGGGTAGGGATTTCCGCGACAGTCCGGAAGGTCCTGTCCATGCCGAGGTGAACATCGTTAAAAAGACCGAAG  
TACAGACCGGAGGCTTCTCAAGGAAAGTATCTCCGAAAAGGAAACAGCGACAAGCTGATCGCACGCAAAAAGATTGGGACCCCAAGAAATACGG  
CGGATTCGATTTCTTACAGTCTGCTTACAGTGTACTGGTTGTGGCCAAAGTGGAGAAAGGAGTCTAAAAAACTCAAAGCGTCAAGGAACCTGCTG  
GGCATCAATCATGGAGTCAAGCTTCAAGAACTTCAAGAACTTCAAGCTTTCGAGGAAAGGATATAAAGAGGTACCAAAAAGACTCATCATTA  
AGCTTCCCAAGTACTCTCTTTGAGCTTGAAAACGGCCGAAACGAATGCTCGCTAGTGCAGGAGGCTGCAGAAAGGTAACGAGCTGGCACTGCC  
CTCTAAATACGTTAATTTCTTGTATCTGGCCAGCCACTATGAAAAGCTCAAAGGGTCTCCCGAAGATAATGAGCAGAAAGCAGCTGTTGCTGGAAACA  
CACAAACTACTCTTGTAGATCATCGAGCAATAAGCGAATTTCTCAAAGAGTGTATCTCGCCGACGCTAACCTCGATAAGGTGCTTTCTGCTT  
ACAATAAGCACAGGGATAAGCCGTACGGGAGCAGGACAGAAAACATTAATCCACTTGTATTACTCTGACCAACTTGGGCGCCCTGCAGCCTTCAAGTA  
CTTCGACACCACATAGACAGAAAGCGGTACACCTCTACAAGGAGGTCCTGGACGCCACACTGATTCATCAGTCAATACGGGGCTCTATGAAACA  
AGAATCGACCTCTCTCAGCTCGGTGGAGACTAA

>ST1cas

ATGAGCGACCTGGTGTGGGCTGGACATCGGCATCGGCAGCGTGGGCGTGGGCATCCTGAACAAGGTGACCGGCGAGATCATCCACAAGAACAGTC  
GCATCTTCCCTGCTGCTCAGGCTGAGAAACAACCTGGTGCGCCGACCAACCGCCAGGTCGCCGGCTTGTCTGCCGCAAGAAGCACCGGCGCTGCG  
CCTGAACCGCCTGTTTCGAGGAGAGCGGCTGATCACCAGCTTACCAAGATCAGCATCAACCTGAACCCCTACAGCTGCGCGTGAAGGGCTGACC  
GACGAGCTGAGCAACGAGGAGCTGTTTCAATCGCCCTGAAGAACATGGTGAAGCACCGCGGCATCAGCTACCTGGACGACGCCAGCGACGCGCAACA  
GCAGCGTGGGCGACTGCCCCAGATCGTGAAGGAGAACAGCAAGCAGCTGGAGACCAAGCCCGGCGAGATCCAGCTGGAGCTGACCGCTACCAGCCTA  
CGGCCAGCTGACCGCGCCTTACCGTGGAGAAAGGACGGCAACAGATCACTCAACTGATGAAGAAGGAGGAGGAGGAGGAGGAGGAGGAGGAGGAGG  
CGCATCTGCAGACCCAGCAGGAGTTCAACCCCGAGTACCCGACGAGTTCATCAACCGCTACCTGGAGATCTTGACCGGCAAGCGCAAGTACTACC  
ACGGCCCCGGCAACGAGAAAGAGCCGACCGACTACGGCCGCTACCGCACAGCGGCGAGACCTGGACAACATCTTCCGCTCCTGATCGGCAAGTG  
CACCTTACCCCGACGAGTTCGCGCCGCCAAGGCCAGCTACACCGCCAGGAGTTCAACCTGCTGAACGACCTGAACAACCTGACCGTGCACCAC  
GAGCAAGAAGCTGAGCAAGGAGCAGAAGAACCAGATCATCAACTGATGAGGAGGAGGAGGAGGAGGAGGAGGAGGAGGAGGAGGAGGAGGAGGAG  
CCAAGCTGCTGAGCTGCGACGTGGCCGACATCAAGGGTACCCGATCGACAAGAGCGGCAAGGCCGAGATCCACACCTTCGAGGCCTACCGCAAGAT  
GAAGACCTGGAGACCTGGACATCGAGCAGATGGACCGGACAGCTGGACAAGCTGGCCTACGTTGCTGACCTGAACACCGAGCGCGAGGGCATC  
CAGGAGGCCCTGGACACGAGTTCGCCGACGGCAGTTCAGCGAGAAGCAGGTTGGACGAGCTGGTGCAGTTCGCGAAGGCCAACAGCAGCATCTTCG  
GCAAGGGCTGGCAACTTTCAGCTGAGCTGATGATCAGCTGATCCCGACTGATCCCGACTGATCCCGACTGATCCCGACTGATCCCGACTGATCCCGACT  
GGGCAAGCAGAAGACCACCGACGACGCAACAAGCAAGTACATCGACGAGAAGCTGCTGACCGAGGAGATCTACAACCCCGTGGTGGCCAAAGAGC  
GTGCGCCAGGCCATCAAGATCGTGAACGCCCATCAAGGAGTACGGGCACTTCGACAACATCGTGAATCGAGATGGCCCGGAGACCAACGAGGAGC  
ACGAGAAGAAGGCCATCCAGAAGATCCAGAAGGCCAACAAGGACGAGAAGGACGCGCCATGCTGAAGGCCGCAACACAGTACAACGGCAAGGCCGA  
GCTGCCCCACAGCTGTTCCAGCCGCAAGCAGCTGGCCACCAAGATCCCGCTGTGCACACCAGCAGGCGAGGCGCTGCTGTAACAGGCAAGGTA  
ATCAGCATCCACGACCTGATCAACAACAGCAACCGATTTCGAGGTGGACCACATCTGCCCCTGAGCATCACTTCGACGACAGCCTGGCCAACAAGG  
TGCTGGTGTACGCCACCGCAACCGAGGAGAAGGGCCAGCGCACCCCTTACAGGCCCTGGACAGCATGGACGACGCTGGAGCTTCCGCGAGCTGAA  
GGCCTTCGTGCGCGAGCAAGACCCCTGAGCAACAAGAAGGAGTACCTGCTGACCGAGGAGGACATCAGCAAGTTCGAGCTGCGCAAGAAGTTT  
ATCGAGGCAACCTGGTGGACACCCGCTACGCCAGCCGCTGGTGTGTAACGCGCTTCAGGAGCAGCTTCCGCGCCCAAGATCGACACCAAGGTA  
GCGTGGTGCAGGCGCAGTTTACCAGCCAGCTGCGCCGCACTGGGGCATCGAGAAGACCCGCGACCTTACCACCACACCGCCGTTGGACGCCCTGAT  
CATGCGGCTTCTAGCCAGCTGAACCTGTGGAAGAAGCAGAAGAACAACCTTGGTGAAGTACAGCGGAGACAGCTGCTGGACATCGAGACCGGCGAG  
CTGATCAGCGACGAGTACAAGGAGAGCGTGTTCAGGGCCCTTACCAGCACTTCTGTTGACACCCCTGAAGAGCAAGGAGTTCGAGGACAGCATCC  
TGTTCAGCTACAGGTTGACAGAGTTTCAACCGCAAGATCAGCGAGGACCACTTACCGCCACCCGCGAGGCAAGGAGGAGGAGGAGGAGGAGGAGG  
CGAGACCTACGTTGCTGGCAAGATCAAGGACATCTACACCCAGGACGGCTACGACGCTTTCATGAAGATCTACAAGAAGGACAAGAGCAAGTTCCTG  
ATGTACCGCCACGACCCCGAGCCTTCGAGAAGGTGATCGAGCCATCCTGGAGAATACCCCAACAAGCAGATCAACGATAAAGGCCAAGGAGGTGC  
CCTGCAACCCCTTCTGAAGTACAAGGAGGAGCAGCGGTACATCCGCAAGTACAGCAAGAAGGGCAACCGGCCCGAGATCAAGAGCCTGAAGTACTA  
CGACAGCAAGCTGGGCAACACATCGACATCACCCCAAGGACAGCAACAACAAGGTGGTGTGTCAGAGCTGAGCCCTGGCGCCAGGCAAGGAGTGTAC  
TTCAACAAGACCACCGCAAGTACGAGATCTGGGCTGAAGTACGCCGACCTGCAGTTTGTAAAGGGCACCGGCACTACAAGATCAGCCAGGAGA  
AGTACAACGACATCAAGAAGAAGGAGGCGTGGACAGCGACAGCGAGTTCAAGTTACCCCTGTACAAGAACACCTTCTGCTGGTGAAGGACACCGA  
GACCAAGGAGCAACAGCTGTTCCGCTTCTGAGCCGACCATGCCCAAGCAGCAAGCAACTACGTTGGAGCTGAAGCCCTACGACAAGCAGAAAGTTTCGAG  
GGCGCGAGGCTGATCAAGTTGCTGGGCAACGTCGCAACAGCGGCGAGTGCAGAAAGGGCTGGGCAAGGCAACACTCAGCATCTACAAGGTTGC  
GCACCGAGCTGCTGGCAACAGCAGCATCATCAAGAACGAGGGCGACAAGCCCAAGCTGGACTTCTAA

>STcas<sub>m4</sub>

ATGAGCGACCTGGTGCTGGCCATCGGCATCGGCAGCGTGGCGTGGGCATCCTGAACAAGGTGACCGGCGAGATCATCCACAAGAACAGTC  
GCATCTTCCCTGCTGCTCAGGCTGAGAACAACTGGTGCGCCGCCAACCCGCCAGGGTGCGCCGCTTGTGCGCCGAAAGAAGCACCGGCGCTGCG  
CCTGAACCGCCTGTCGAGGAGAGCGGCTGATCACCAGCTTACCAAGATAGCATCAACCTGAACCCCTACCAGCTGCGCGTGAAGGGCCTGACC  
GACGAGCTGAGCAACGAGGAGCTGTTTATCGCCCTGAAGAACTGGTGAAGCACCGCGGCATCAGCTACCTGGACGACGCCAGCGACGACGGCAACA  
GCAGCGTGGCGGACTACGCCAGATCGTGAAGGAGAAGCAAGCAGCTGAGCAGTGAAGACCAAGACCCCGCCAGATCCAGCTGGAGCGTACCAGACCTA  
CGCCAGCTGCGCGGCGACTTACCCTGGAGAAGGACGGCAAGAAGCACCGCCTGATCAACCTGTTCCCAACCAGCGCTACCAGCGAGGGCCCTG  
CGCATCTGCAGACCCAGCAGGAGTTCAACCCCGATCACCAGCAGTTCATCAACCGCTACCTGGAGATCTGACCGGCAAGCGCAAGTACTACC  
ACGGCCCGGCAACGAGAAGAGCCGACCCGACTACGGCCGCTACCCGCCAGCGGCGAGACCTGGACAACATCTTTCGGCATCCTGTATCGGCAAGTG  
CACCTTACCCCGCAGCTTCCGCGCCGCAAGGCCAGCTACACCGCCAGGAGTTCAACCTGCTGACGACCTGAACAACCTGACCGTGCACCAC  
GAGACCAAGAAGCTGAGCAAGGAGCAGAAGAACCAGATCATCAACTACGTGAAGAAGCGAAGGCCATGGGCCCCCGCAAGCTGTTCAAGTACATCG  
CCAAGCTGCTGAGCTGCGACGTGGCCGACATCAAGGGTACCAGCATCGACAAGAGCGGCAAGGCCGAGATCCACACCTTCGAGGCCTACCGCAAGAT  
GAAGACCTGGAGACCTGGACATCGAGCAGATGGACCGCGAGACCTGGACAAGCTGGCCTACGTGCTGACCTGAACACCGAGCGCGAGGGCCTC  
CAGGAGGCCCTGGAGCAGGTTCCGCCAGCGAGCTTACCCAGAAGCAGGTGGACGAGCTGGTGCAGTTCCGCAAGGCCAACAGCAGCATCTTCG  
GCAAGGGCTGGCACAACCTCAGCGTGAAGCTGATGATGGAGCTGATCCCCGAGCTGTACGAGACCAGCGAGGAGCAGATGACCATCCTGACCCGCT  
GGCAAGCAGAAGACCACCAGCAGCAGCAACAAGCCAAGTACATCGACGAGAAGCTGCTGACCGAGGAGATCTACAACCCCTGGTGGCCAAAGAGC  
GTGCGCCAGGCCATCAAGATCGTGAACCGCCATCAAGGAGTACGGCGACTTCGACAACATCGTGTGAGATGGCCCGGAGACCAACGAGGACG  
GCTGCCCCACAGCTGAGCAAGGAGCAGAAGAACCAGATCATCAACTACGTGAAGAAGCGAAGGCCATGGGCCCCCGCAAGCTGTTCAAGTACATCG  
ATCAGCATCCACGACCTGATCAACAACGACAACAGTTCGAGGTGGCTGCCATCCTGCCCTGAGCATCACCTTCGACGACAGCTGGCCAACAAGG  
TGCTGGTGTACGCCACCGCCGCTCAGGAGAAGGGCCAGCGCAGCCCTACCAGGCCCTGGACAGCATGGACGACGCTGGAGCTTCCGCGAGCTGAA  
GGCTTCGTGCGCGAGCAAGACCTGAGCAACAAGAAGGAGTACCTGCTGACCGAGGAGCAGATCAGCAAGTTCGAGCTGCGCAAGAAGTTC  
ATCGAGCAACCTGGTGGACACCCGCTACGCCAGCCGCTGCTACCGCCAGGAGTGAACCAAGCTGGGAGCAGCTTCCGCGCCCAAGATCGACCAAGGTA  
GCGTGGTGCAGCGGCTTACCAGCCAGCTGCGCCGCACTGGGCACTCGAGAAGACCCGCGACACCTACCACCACCAGCCGCTGGAGCCCTGAT  
CATGCGGCTTCTAGCCAGCTGAACCTGTGGAAGAAGCAGAAGAACCCTGGTGAAGTACAGCGAGGACAGCTGCTGGACATCGAGACCGCGAG  
CTGATCAGCGACGAGTACAAGGAGAGCGTGTTCAGGCCCCCTACCAGCACTTCGTGGACACCTGAAGAGCAAGGAGTTCGAGGACAGCATCC  
TGTTACGCTACAGGACAGTTCACCGCAAGTTCACCGCAAGATCAGCCAGGACCCGCTGTCGACACCGCCAGGCCAAGCTGGGCAAGGCCGCA  
CGAGACCTACGTGCTGGCAAGATCAAGGACATCTACACCCAGGACGGCTACGACGCTTCATGAAGATCTACAAGAAGGACAAGAGCAAGTTCCTG  
ATGTACCGCCACGACCCCGAGCCTTCGAGAAGGTGATCGAGCCATCCTGGAGAATACCCCAACAAGCAGATCAACGATAAAGGCAAGGAGGTGC  
CCTGCAACCCCTTCTGAAGTACAAGGAGGAGCAGCGCTACATCCGCAAGTACAGCAAGAAGGGCAACGGCCCGAGATCAAGAGCCTGAAGTACTA  
CGACAGCAAGCTGGGCAACACATCGACATCACCCEAAGGACGAGCAACAACAGGTGGTGTGTCAGAGCTGAGCCCTGGCCAGCCGCGCTGTAC  
TTCAACAAGACCACCGGCAAGTACGAGATCCTGGCCGTAAGTACGCCGACCTGCAGTTTGATAAGGGCACCGGCACCTACAAGATCAGCCAGGAGA  
AGTACAACGACATCAAGAAGAAGGAGGGCGTGGACAGCGACAGCGAGTTCAAGTTACCCCTGTACAAGAACGACCTTCTGCTGGTGAAGGACACCGA  
GACCAAGGAGCAACAGCTGTTCCGCTTCTGAGCCGACCATGCCAAGCAGAAGCACTACGTGGAGCTGAAGCCCTACGACAAGCAGAAGTTCGAG  
GGCGCGAGGCCCTGATCAAGGTGCTGGGCAACGCTGGCCCAACAGCGCTGCAAGAAGGGCTGGGCAAGGACAACATCAGCATCTACAAGGTGC  
GCACCGAGCTGCTGGGCAACCAGCAGATCATCAAGAACGAGGGCGACAAGCCCAAGCTGGACTTCTAA

>NMcas

ATGGCCGCTTCAAGCCCAACCCCATCAACTACATCCTGGGCCGTGGACATCGGCATCGCCAGCGTGGGCTGGGCCATGGTGGAGATCGACGAGGACG  
AGAACCCATCTGCTGATCAGCTGGGTGTGCGCGTGTTCGAGCCGCTGAGGTGCCCAAGACTGGTGAAGTATGGCTCGCCGCTGCTG  
TCGCTCTGTTCCGCGCCTTACTCGCCGCGCTCACCCTTCTGCGCGCTGCGCCGCTGCTGAAGCGCGAGGGTGTGCTGAGGCTGCCGACTT  
GACGAGAACCGCTGATCAAGAGCCTGCCAACACTCCTTGGCAGCTGCGCGCTGCCGCTCTGGACCAGCTGACTCCTCTGGAGTGGAGCGCCG  
TGCTGCTGCACCTGATCAAGCACCGCGGCTACTGAGCCAGCCAAAGAACGAGGGCGAGACCCGCAAGGAGCTGGGTGCTTGTGTAAGGGCGT  
GGCCGACAACGCCACCCCTGCAGACTGGTGACTTCCGCACTCCTGCTGAGCTGGCCCTGAACAAGTTCGAGAAGGAGAGCGCCACATCCGCAAC  
TACGTCGGGCACTACAGCCACACCTTACGCCCAAGGACCTGAGCCGAGCTGCTGCTGTCGAGAAGCAGAAGGAGTTCGGCAACCCCAAGC  
TGAGCGCGGCTGAAGGAGGGCATCGAGACCTGCTGATGACCCAGCGCCCGCCCTGAGCGGCGACGCCGTGCAGAAGATGCTGGGCCACTGCAC  
CTTCGAGCCAGCCGAGCCCAAGGCCCAAGAACACCTACACCAGCGAGCGCTTATCTGGCTGACCAAGCTGAACAACCTGCGCATCCTGGAGCAG  
GGCAGCGAGCGCCCTGACCGACACCGAGCGCGCCACCTGATGGACGAGCCCTACCAGCAAGAGCAAGCTGACCTACGCCAGGCGCCGAAGCTGC  
TGGTCTGGAGGACACCGCTTCTTCAAGGGCTGCGCTACGGCAAGGACAACCGGAGGCCAGCCTGATGGAGATGAAGGCCCTACCACGCCAT  
CAGCCGCGCCTGGAGAAGGAGGGCCTGAAGGACAAGAAGTCTCTGAACCTGAGCCCGAGCTGCAGGACGAGATCGGCACCGCCTTACGCTG  
TTCAAGACCGACGAGGACATCACCAGCCGCTGAAGGACCGCATCCAGCCGAGATCCTGGAGGCCCTGCTGAAGCAGATCAGCTTCGACAAGTTCG  
TGAGATCAGCTGAAGGCCCTGCGCCGATCGTGCCTTATGGAGCAGGGCAAGCGCTACGACGAGGCCCTGCGCCGAGATCTACGGCGACCACTA  
CGGCAAGAAGAACACCGAGGAGAAGATCTACCTGCCTTATCCCGCCGACGAGATCCGCAACCCGCTGGTGTGCTGCGCGCCCTGAGCCAGGCCCC  
AAGGTGATCAACGGCGTGGTGCGCCGCTACGGCAGCCCGCCGCTCCACATCGAGACCGCCCGAGGTTGGCAAGAGCTTCAAGGACCGCAAGG  
AGATCGAGAAGGCCAGGAGGAGAACCGAAGGACCGCGAGAAGGCCCGCCCAAGTTCGCGAGTACTTCCCAACTTCTGGGCGAGCCCAAGG  
CAAGGACATCTGAAGCTGCGCCTGTACGAGCAGCAGCAGCGCAAGTGCCTGTACAGCGGCAAGGAGATCAACCTGGGCGCCTGAACGAGAAGGGC  
TACGTGGAGATCGACGCTTCCCTTTCAGCCGACCTTCAGCCGAGCAGTTCACCAACAAGGTGCTGGTGTGCTGGGAGCGGAGCAACCAAGG  
GCAACAGACCCCTACGAGTACTTCAACGGCAAGGACAACAGCCGAGTGGCAGGAGTTCAGGGCCGCGTGGAGACCAGCCGCTTCCCCGCGAG  
CAAGAAGCAGCGATCCTGCTGAGAAGTTCGACGAGGACGGCTTCAAGGAGCGCAACCTGAACGACACCCGCTACGTGAACCGCTTCTGTGCCAG  
TTCGTGGCCGACCGCATGCGCCTGACCGGCAAGGGCAAGAAGCGCGTGTTCGCGAGCAACGGCCAGATCAACAACCTGCTGCGCGGCTTCTGGGGCC  
TGCGCAAGGTGCGCGCCGAGAAGCAGCCACCGCCCTGGACCGCTGGTGGCTGCGAGCAGCTGGCCATGCAAGCAGGAGATCAAGGAGTCAACCGCT  
CGTGCCTACAAGGAGATGAACGCCCTTCGACGGTAAACCATCGACAAGGAGACCGCGAGGTGCTGCACCAGAAGACCCACTTCCCCAGCCCTGG  
GAGTCTTCGCCCAGGAGGTGATGATCCGCGTGTTCGCAAGCCCGAGCGCAAGCCGAGTTCGAGGAGGCCGACACCCCGAGAAGCTGCGCACCC  
TGCTGGCCGAGAAGCTGAGCAGCCGCTGAGGCCGTGCACGAGTACGTGACTCCTGTTGCTGAGCCGCGCCCAACCGCAAGATGAGCGGTCA  
GGGTACATGGAGACCTGGAAGAGCGCCAAAGCCCTGGACGAGGGCTGAGCGTGTGCGCGTGCCTGAGCCAGTGAAGCTGAAGGACCTGGAG  
AAGATGGTGAACCGGAGCGCGAGCCCAAGCTGTACGAGGCCCTGAAGGCCCGCTGGAGGCCCAAGGACGACCCCGCAAGGCCCTTCGCGGAGC  
CCTTCTACAAGTACGACAAGGCCGCAACCGCACCCAGCAGGTGAAGGCCGTGCGCGTGGAGCAGGTGCAAGAAGCCGCGTGTGGTGCACCA

CAACGGCATCGCCGCAACGCCACCATGGTGGCGTGGACGTGTTTCGAGAAGGGCGACAAGTACTACCTGGTGCCCATCTACAGCTGGCAGGTGGCC  
AAGGGCATCTGCCCCGACCGCGCGTGGTGCAGGGCAAGGACGAGGAGACTGGCAGCTGATCGACGACAGCTTCAACTTCAAGTTAGCCTGCACC  
CCAACGACCTGGTGGAGTGATACCAAGAAGGCCGATGTTTCGGCTACTTCCGACGCTGCCACCGCGGACCGGCAACATCAACATCCGCATCCA  
CGACCTGGACCACAAGATCGGCAAGAACGGCATCTGGAGGGCATCGCGTGAAGACCGCCCTGAGCTTCCAGAAGTACCAGATCGACGAGCTGGG  
AAGGAGATCCGCCCTGCGCCTGAAGAAGCGCCCTCTGTGGCTAA

### >NMcas<sub>m4</sub>

ATGGCCGCTTCAAGCCCAACCCATCAACTACATCTGGCCCTGGCCATCGCCAGCGTGGGCTGGGCCATGGTGGAGATCGACGAGGACG  
AGAACCCCATCTGCCTGATCGACCTGGGTGTGCGCGTGTTCGAGCGCGCTGAGGTGCCAAGACTGGTGACAGTCTGGCTATGGCTCGCCGGCTTGC  
TCGCTCTGTTTCGGCGCTTACTCGCCGCGCGCTCACCGCCTTCTGCGCGCTCGCCGCTGCTGAAGCGCGAGGGTGTGCTGCAGGCTGCCGACTTC  
GACGAGAACCGCCTGATCAAGGCGATCGAGACCTCTGGCAACACTCTGGCAGTTCGCGCTGCCCTTCCGACCGCAAGCTGACTTCTGGAGTGGAGCGCG  
TGCTGCTGCACCTGATCAAGCACCGCGCTACCTGAGCCAGCGCAAGAAGCAGGGCGAGACCGCCGACAAGGAGCTGGGTGCTGCTGAAGGGCGT  
GGCCGACAACGCCACCGCCTGCAGACTGGTGAATCTCCGCATCTGCTGAGCTGGCCCTGAACAAGTTCGAGAAGGAGAGCGGCCACATCCGCAAC  
CAGCGCGGCGACTACAGCCACACTTACAGCCGAAGGACCTGCAGGCGGAGCTGATCTGCTGTTTCGAGAAGCAGAAGGAGTTTCGGCAACCCACG  
TGAGCGCGCGCTGAAGGAGGGCATCGAGACCTGCTGATGACCCAGCGCCCGCCCTGAGCGCGCAGCCTGCAGAAGATGCTGGGCCACTGCAC  
CTTCGAGCCAGCCGAGCCCAAGGCGCCCAAGAACACTACCCGCGGAGCGCTTATCTGGCTGACCAAGCTGAACAACCTGCGCATCTGGAGCAG  
GGCAGCGAGCGCCCTGACCGACACCGAGCGCGCACCTGATGAGCAGGCTTACCGCAAGAGCAAGCTGACCTAGCCACAGGCCGCAAGCTGC  
TGGGTCTGGAGGACACCGCTTCTTCAAGGGCTGCGCTACGGCAAGGACAACGCCGAGGCCAGCACCCTGATGGAGATGAAGGCTTACCACGCCAT  
CAGCCCGCCCTGGAGAAGGAGGGCCTGAAGGACAAGAAGTCTTGAACCTGAGCCCGAGCTGCAGGACGAGATCGGCACCGCCTTCAGCCTG  
TTCAGACCGACGAGGACATCACCGCCGCTGAAGGACCGCATCCAGCCCGAGATCTGGAGGCCCTGCTGAAGCACATCAGCTTCGACAAGTTTCG  
TGAGATCAGCCTGAAGGCCCTGCGCCGCATCGTGCCCTGATGGAGCAGGGCAAGCGCTACGACGAGGCTGCGCCGAGATCTACGCGGACCACTA  
CGGCAAGAAGAACCAGGAGAGAATCTACCTGCCTCTATCCCGCCGACGAGATCCGCAACCCGTTGGTGTGCGCGCCTGAGCCAGGCCCCG  
AAGGTGATCAACGGCGTGGTGGCCGCTACGGCAGCCCGCCGCTACCCATCCACATCGAGACCGCCCGAGGTTGGCAAGAGCTTCAAGGACCGCAAG  
AGATCGAGAAGCGCCAGGAGGAGAACCGAAGGACCGCGAGAAGGCCCGCCCAAGTTCGCGAGTACTTCCCAACTTCTGGGCGAGCCCAAGAG  
CAAGGACATCTGAAGCTGCGCCTGTACGAGCAGCAGCAGCGCAAGTGCCTGTACAGCGGCAAGGAGATCAACTGGCCCGCTGAACGAGAAGGGC  
TACGTGGAGATCGCCGCTGCCCTTACGCGCACCTGGGACGACAGCTTCAACAACAAGGTGCTGGTGTGGGCGAGGCTCAGAACAAGG  
GCACCGAGCCCTACGAGTACTTCAACGGCAAGGACAACAGCCGCGAGTGGCAGGAGTTCAGGCCCCTGGAGACCCAGCCGCTTCCCGCGAG  
CAAGAAGCAGCGCATCTGCTGCAGAAGTTCGACGAGGACGGCTTCAAGGAGCGCAACCTGAACGACACCCGCTACGTGAACCGCTTCTGTGCCAG  
TTCGTGGCCGACCGCATGCGCCTGACCGGCAAGGGCAAGAAGCGCTGTTCCGCCAGCAACGGCCAGATCACCAACCTGCTGCGCGCTTCTGGGGCC  
TGCGCAAGGTGCGCGCCGAGAACGACCGCCACCACGCCCTGGACGCGCTGGTGGTGGCCCTGCAGCACCGTGGCCATGCAGCAGAAGATCACCCGCTT  
CGTGGCTACAAGGAGATGAACGCCCTTCGACGGTAAAACCATCGACAAGGAGACCGCGGAGGTGCTGCACAGAAGACCCACTTCCCGCAGCCCTGG  
GAGTCTTCGCCCAGGAGGTGATGATCCGCGTGTTCGGCAAGCCGACGGCAAGCCCGAGTTCGAGGAGGCCGACACCCCGAGAAGCTGCGCACCC  
TGCTGGCCGAGAAGCTGAGCAGCGCCCTGAGGCCGTGCACGAGTACGTGACTTCTGTTGCTGAGCCGCGCCCAACCGCAAGATGAGCGGTCA  
GGGTACATGGAGACCGTGAAGAGCGCAAGGCCCTGGACGAGGGCGTGGAGGCTGCTGCGCGTGGCCCTGACCCAGCTGAGCTGAAGGACCTGGAG  
AAGATGGTGAACCGCGAGCGCGAGCCCAAGCTGTACGAGCCCTGAAGGCCCGCTGGAGGCCCAAGGACGACCCCGCAGCCGCTTCCCGCGAGC  
CCTTCTACAAGTACGACAAGGCCGCAACCGCACCCAGCAGGTGAAGGCCGTGCGCGTGGAGCAGGTGCAGAAGACCGGCGTGTGGTGGCAACCA  
CAACGGCATCGCCGCAACGCCACCATGGTGGCGGTGGACGTGTTTCGAGAAGGGCGACAAGTACTACCTGGTGCCCATCTACAGCTGGCAGGTGGCC  
AAGGGCATCTGCCCCGACCGCGCGTGGTGCAGGGCAAGGACGAGGAGACTGGCAGCTGATCGACGACAGCTTCAACTTCAAGTTAGCCTGCACC  
CCAACGACCTGGTGGAGTGATACCAAGAAGGCCGATGTTTCGGCTACTTCCGACGCTGCCACCGCGGCAACATCAACATCCGCATCCA  
CGACCTGGACCACAAGATCGGCAAGAACGGCATCTGGAGGGCATCGCGTGAAGACCGCCCTGAGCTTCCAGAAGTACCAGATCGACGAGCTGGG  
AAGGAGATCCGCCCTGCGCCTGAAGAAGCGCCCTCTGTGGCTAA

### >TDcas

ATGAAGAAGGAGATCAAGGACTACTTCTGGGCTGGACGTGGGACCGCGAGCGTGGGCTGGGCCGTGACCGACACCGACTACAAGCTGCTGAAGG  
CCAACCGCAAGGACCTGTTGGGGCATGCGCTGCTTCGAGACTGTGAGACCGCGAGGTGCGCGCGCTGCACCGCGGTGCTCGCCGGCGCATCGAGCG  
CCGCAAGAAGCGCATCAAGCTGCTGCAGGAGCTGTTACGCCAGGAGATCGCCAAGACCGACGAGGGCTTCTTCCAGCGCATGAAGGAGAGCCCTTC  
TACGCGGAGGACAAGACCATCTGCAGGAGAACACCTGTTCAACGACAAGGACTTCGCCGACAAGACCTACCACAAGGCCTACCCACCATCAACC  
ACCTGATCAAGGCCTGGATCGAGAACAAGGTGAAGCCCGACCTCGCCTGCTGATCTGACCTGGCCTGCCACAACATCATCAAGAAGCGCGGCCACTTCT  
GTTTCAGGGCGACTTCGACAGCGGAGAACCAGTTCGACACAGCATCCAGGCCCTGTTTCGAGTACTTCCGCGGAGGACATGGAGGTGGACATCGACGCG  
GACAGCCAGAAGGTGAAGGAGATCTGAAGGACAGCAGCCTGAAGAACAGCGAGAAGCAGAGCCGCTGAACAAGATCTGGGCCCTGAAGCCAGCG  
ACAAGCAGAAGAAGGCCATCACCAACCTGATCAGCGGCAACAAGATCAACTTCGCCGACCTGTACGACAACCCGACCTGAAGGACCGCGAGAAGAA  
CAGCATCAGCTTACGCAAGGACGACTTCGACGCGCTGAGCGACGACCTGGCCAGCATCTGGGCGACAGCTTCGAGCTGCTGCTGAAGGCCAAGGCC  
GTGTACAACCTGCAGCGTGTGAGCAAGGTGATCGGCGACGAGCAGTACCTGAGCTTCGCCAAGGTGAAGATCTACGAGAAGCAAGACCGACCTTA  
CCAAGCTGAAGAAGCTGATCAAGAAGCACTTCCCAAGGACTACAAGAAGGTGTTTCGGCTACAACAAGAAGCAGAAGAACAACAACACTACAGCGG  
CTACGTGGGCGTGTGCAAGACCAAGAGCAAGAAGCTGATCATCAACAACAGCGTGAACCGAGGAGACTTCTACAAGTTCCTGAAGACCATCTGAGC  
GCCAAGAGCGGATCAAGGAGGTGAACGACATCTGACCGGATCGAGACCGGACCTTCTGCCCAGCAGATCAGCAAGAGCAACCGGATCC  
CTACCGACTGCGGAGTGGAGATGGAGATCTGAGCAACGCGGAGAAGCATTCGAGCTTCTGAAGCAGAAGAGCAGAAGGCGGCTGAGCCCA  
CAGCGAGAAGATCATCATGCTGCTGACCTTCAAGATCCCTACTACATCGGCCCATCAACGACAACCAAGAAGTTCCTTCCCGACCGCTGCTGG  
GTGGTGAAGAAGGAGAAGAGCCCGAGCGCAAGACCACCCCTGGAATTCCTTCGACCACATCGACAAGGAGAAGACCGCCGAGGCCCTCATACCA  
GCCGACCAACTTCTGCACATACCTGGTGGGCGAGAGCGTGTGCCAAGAGCAGCCTGCTGTACAGCGAGTACACCGTGTGAACGAGATCAACCA  
CCTGCAGATCATCATCGACAGAACAATCTGCGACATCAAGTGAAGCAGAAGATACGAGGACCTGTTCAAGAGTACAAGAAGTACAAGACCTGAG  
AAGCAGATCAGACCTTTCATCAAGACACGAGGGCATCTGCAACAAGACCGACGAGGTGATCATCTGGGCATCGACAAGGAGTCAACAGCAGCCTGA  
AGACTACATCGAGCTGAAGAACATCTTCGGCAAGCAGGTGGACGAGATCAGCACCAAGAACATGCTGGAGGAGATCATCCGCTGGGCCACCATCTA  
CGACGAGGGCGAGGGCAAGACCATCTGAAGACCAAGATCAAGGCCGAGTACGGCAACGAGTACTGCAGCGACGAGCAGATCAAGAAGATCTGAACTG  
AAGTTCAGCGCTGGGCGCCCTGAGCGCAAGTTCCTGGAGCCTGACCGAGATGCCGAGTCCCGGCTTCAGCGAGCCCGTGAACATCATCACGCCA  
TGCGGAGACCAAGAACCTGATGGAGCTGCTGAGCAGGATTCACCTTACCAGAACATCAAGAAGATCAACAGCTGCTTCGAGGACCGCGA  
GAAGCAGTTCAGTACGACGCGCTGGTGAAGCCCTGTTCTGAGCCCGAGCTGAAGAAGATGCTGTGGCAGACCTGAGCTGGTGAAGGAGATC

AGCCACATCACCAGGCTCCTCCTAAGAAGATCTTCATCGAGATGGCCAAGGGCGCCGAGCTGGAGCCTGCTCGCACCAGACCCGCCTGAAGATCC  
TGCAGGACCTGTACAACAACTGCAAGAACGACGCCGACGCATTCAGCAGCGAGATCAAGGACCTGAGCGGCAAGATCGAGAACGAGGACAACCTGCC  
CCTGCGCAGCGACAAGCTGTACCTGTACTACACCCAGCTGGGCAAGTGCATGTACTGCGGCAAGCCCATCGAGATCGGCCACCTGTTTCGACACCAGC  
AATACGCACATCGACCACATCTACCCCCAGAGCAAGATCAAGGACGACAGCATCAGCAACCCGCTGCTGGTGTGCAGCAGCTGCAACAAGAACAAGG  
AGGACAAGTACCTCTGAAGAGGAGATCCAGAGCAAGCAGCGGGCTTCTGGAATCTCTGCAGCGCAACAACCTTATCAGCTGGAGAAGCTGAA  
CCGCTGACCCCGCCACCCCATCAGCGACGACGAGACCCCAAGTTCATCGCCCGCCAGCTGGTGGAGACTCGCCAAGCTACCAAGGTGGCCGCC  
AAGGTGCTGGAGAAGATGTTCCCGGAGACCAAGATCGTGTACAGCAAGCCGAGACCGTGGAGCATGTTCCGCAACAAGTTCGACATCGTGAAGTGCC  
GCGAGATCAACGACTTCCACCACGCCACGACGCTTACCTGAACATCGTGGTGGGCAACGTGTACAACACCAAGTTCACCAACAACCCCTGGAATTT  
CATTAAGGAGAAGCGGCAACCCCAAGATCGCCGACCTACAACACTACTACAAGGTGTTGACTACGACGTGAAGCGCAACAACATCACCCTGG  
GAGAAGGCAAGACCATCATCACCCTGAAGGACATGCTGAAGCGCAACACCCCATCTACACCCGCCAGGCCCTGCAAGAAGGGCGAGCTGTTCA  
ACCAGACCATCATGAAGAAGGGCTGGGCCAGCACCCCTGAAGAAGGAGGGCCCTTACGCAACATCAGCAAGTACGGCGGTACAACAAGGTGAG  
CGCCGCTACTACACCTGATCGAGTACGAGGAGAAGGGCAACAAGATCCGCGACCTGGAGACCATCCCTGTACCTGGTGAAGGACATCCAGAAG  
GACCAGGACGTGCTGAAGAGTACCTGACCGACCTGCTGGCAAGAAGGAGTCAAGATCCTGGTGCCAAGATCAAGATCAACAGCTGCTGAAGA  
TCACCGGCTTCCCTGCCACATCACCAGCAAGACCAAGCAGACGCTTCTGCTGCGCCCGCCGCTGCAGTTCCTGCTGCAGCAACAACGAGGTGCTGTA  
TTCAAGAAGATCATCCGCTTACGCGAGATCCGCGAGCGCGGAGAAGATCGGCAAGACCATCAGCCCTACGAGGACCTGAGCTTCCGACGCTAC  
ATCAAGGAGAACCTGTGGAAGAAGACCAAGAAGCAGAGATCCGCGAGGAGGAGTTCACGACCTGCTGCAGAGAAGAACAACCTGGAGATCAGGACA  
TGCTGCTGACCAAGCACAAGGACACCATCTACAAGAAGCGCCCAACAGCGCCACCATCGACATCCTGGTGAAGGGCAAGGAGAAGTCAAGAGCCT  
GATCATCGAGAACCAGTTCGAGGTGATCCTGGAGATCCTGAAGCTGTTACGCGCCACCCGCAACGTGAGCGACCTGCAGCACAACGCGGCGACCAAG  
TACAGCGCGTGGCCAAGATCGGCAACAAGATCAGCAGCTGGACAACCTGCATCCTGATCTACCAGAGCATCACCGGCATCTTCGAGAAGCGCATCG  
ACCTGCTGAAGGTGTAA

>TDcas<sub>m4</sub>

ATGAAGAAGGAGATCAAGGACTACTTCTGGGCTGGCCGTGGCCACCCGCGAGCTGGGCTGGGCCGTGACCGACACCCGACTACAAGTGTGTAAGG  
CCAACCGCAAGGACCTGTGGGGCATGCGCTGCTTCGAGACTGCTGAGACCGCCGAGGTGCGCCGGCTGCACCGCGGTGCTCGCCGGCGCATCGAGCG  
CCGCAAGGAGCGCATCAAGCTGCTGCAGGAGCTGTTACAGCCAGGAGATCGCCAAGACCGCAGCAGGGCTTCTTCCAGCGCATGAAGGAGAGCCCTTC  
TACGCGGAGGACAAGACCATCTGCAGGAGAACACCCTGTTCAACGACAAGGACTTCGCCGACAAGACCTACCACAAGGCCTACCCACCATCAACC  
ACCTGATCAAGGCTGGATCGAGAACAAGGTGAAGCCCGACCCCTCGCTGCTGTACCTGCGCTGCCACAACATCATCAAGAAGCGCGCCACTTCTCT  
GTTTCGAGGGGCACTTCGACAGCGAGAACCAGTTCGACACCAGCATCCAGGCCCTGTTTCGAGTACCTGCGCGAGGACATGGAGGTGGACATCGACGCC  
GACAGCCAGAAGGTGAAGGAGATCCTGAAGGACAGCAGCCTGAAGAAGCAGCGAGAAGCAGAGCCCTGAACAAGATCCTGGCCCTGAAGCCAGCG  
ACAAGCAGAAGAAGGCCATCACAACCTGATCAGCGGCAACAAGATCAACTTCGCGACCTGTACGACAACCCCGACCTGAAGGACGCGGAGAAGAA  
CAGCATCAGCTTCAGAGGACTTTCAGCCCTGAGCGCCTGAGCGACGACCTGGCCAGCAGCTTCCCTGCCAAGCAGATCGAGAAGACGAGGACCAAGCC  
GTGTACAACCTGCAGCGTGTGAGCAAGGTGATCGGCGACGAGCAGTACCTGAGCTTCGCCAAGGTGAAGATCTACGAGAAGCACAAGACCGACCTTA  
CCAAGCTGAAGAAGCTGATCAAGAAGCACTTCCCAAGGACTACAAGAAGGTGTTCCGCTACAACAAGACGAGAAGAAACAACAACACTACAGCGG  
CTACGTGGGCGTGTGCAAGACCAAGAGCAAGAGCTGATCATCAACACAGCGTGAACCAAGGAGACTTCTACAAGTTCCTGAAGACCATCCTGAGC  
GCCAAGGCGAGATCAAGGAGGTGAACGACATCCTGACGAGATCGGCAAGCAGCTTCCCTGCCAAGCAGATCGAGAAGACGAGGACCAAGCTTCC  
CCTACCAGCTGCCAAGATGGAGCTGGAGAAGATCCTGAGCAACGCCGAGAAGCATTTCAGCTTCCCTGAAGCAGAAGGACGAGAAGGGCCCTGAGCCA  
CAGCGAGAAGATCATCATGCTGTGACCTTCAAGATCCCTACTACATCGGCCCATCAACGACAACCACAAGAAGTTCCTCCCGACCGCTGCTGG  
GTGGTGAAGAAGGAGAAGAGCCCGAGCGCAAGACCCCTGGAACCTTCTTCGACCACATCGACAAGGAGAAGACCGCCGAGCCCTTATCACC  
GCGCAACACTTCTGACAGATGTTGGGCGAGGCTGCTGCCAAGCAGCAGCTGCTGACAGCGGATACACCTGCTGACAGCGGATCAAGGAGTCAACAA  
CCTGCAGATCATCATCGACGGCAAGAACATCTGCGACATCAAGCTGAAGCAGAAGATCTACGAGGACCTGTTCAAGAAGTACAAGAAGATCACCCAG  
AAGCAGATCAGCACCTTATCAAGCAGGAGGATCTGCAACAAGACCGACGAGGTGATCATCCTGGGCATCGACAAGGAGTGCACCAGCAGCCTGA  
AGAGTACATCGAGTGAAGAACATCTTCGGCAAGCAGGTGGACGAGATCAGCACCAGAACAATGCTGGAGGAGATCATCCGCTGGGCCACCATCTA  
CGACGAGGGCGAGGCAAGACCATCTGAAGACCAAGATCAAGCCGAGTACGGCAAGTACGCGACGAGCATCGACGACGAGCATCAAGAAGATCCTGAACCTG  
AAGTTCAGCGGCTGGGGCCGCTGAGCCGCAAGTTCCTGGAGACCTGACCGCAGATGCCCCGGCTTCAGCGAGCCCTGCAAGAATCATCACCGCCA  
TGCGCGAGACCCAGAACAACCTGATGGAGCTGCTGAGCAGCGAGTTCACCTTACCAGAGAATCAAGAAGATCAACAGCGGCTTCGAGGACGCCGA  
GAAGCAGTTCAGTACGACGGCTGTTGAAGCCCTGTTCTGAGCCCGAGCTGAAGAAGATGCTGTGGCAGACCTGAAGCTGGTGAAGGAGATC  
AGCCACATCACCAGGCTCCTCCTAAGAAGATCTTCATCGAGATGGCCAAGGGCGCCGAGCTGGAGCCTGCTCGCACCAGACCCGCCTGAAGATCC  
TGCAGGACCTGTACAACAACACTCATCCGCTGAAGGACATGCTGAAGGCAACACCCCATCTACACCCGCAAGGACCTGAGCGGCAAGATCGAGAAGACGAGGACCACTGCG  
CCTGCGCAGCGACAAGCTGTACTGTACTACACCCAGCTGGGCAAGTGCATGTACTGCGGCAAGCCCATCGAGATCGGCCACGTGTTTCGACACCAGC  
AATACGACATCGCTGCTATCTACCCCCAGAGCAAGATCAAGGACGACAGCATCAGCAACCCGCTGCTGGTGTGCAGCAGCTGCGCCAAGAACAAGG  
AGGACAAGTACCTCTGAAGAGCGAGATCCAGAGCAAGCAGCGGCTTCTGGAATCTCTGCAGCGCAACAACCTTATCAGCTGGAGAAGCTGAA  
CCGCTGACCCGCTGCAACCCATCAGCGACGACGAGACCGCAAGTTCATGCCCCGAGCTGGTGGAGACTCGCAAGCTACCAAGGTGGCCGCC  
AAGGTGCTGGAGAAGATGTTCCCGGAGACCAAGATCGTGTACAGCAAGGCCGAGACCGTGGAGCATGTTCCGCAACAAGTTCGACATCGTGAAGTGCC  
GCGAGATCAACGACTTCCACCACGCCACGACGCTTACCTGAACATCGTGGTGGGCAACGTGTACAACACCAAGTTCACCAACAACCCCTGGAATTT  
CATTAAGGAGAAGCGGCAACCCCAAGATCGCCGACACCTACAACACTACTACAAGGTGTTGACTACGACGTGAAGCGCAACAACATCACCCTGG  
GAGAAGGGCAAGACATCATCACCCTGAAGGACATGCTGAAGGCAACACCCCATCTACACCCGCAAGGACCTGCAAGAAGGCGGCGCTGTTCA  
ACCAGACCATCATGAAGAAGGGCTGGGCCAGCACCCCTGAAGAAGGAGGGCCCTTACGCAACATCAGCAAGTACGGCGGTACAACAAGGTGAG  
CGCCGCTACTACACCTGATCGAGTACGAGGAGAAGGGCAACAAGATCCGCGACCTGGAGACCATCCCTGTACCTGGTGAAGGACATCCAGAAG  
GACCAGGACGTGCTGAAGAGTACCTGACCGACCTGCTGGGCAAGAAGGAGTCAAGATCCTGGTGGCCAAGATCAAGATCAACAGCTGCTGAAGA  
TCACCGCTTCCCTGCCACATCACCAGCAAGACCAAGCAGCTTCTGCTGCGCCCGCCGCTGCAAGTTCCTGCTGCAGCAACAACAGGAGTGTGTA  
CTTCAAGAAGATCATCCGCTTACGCGAGATCCGCGAGCCAGCGGAGAAGATCGGCAAGACCATCAGCCCTACGAGGACCTGAGCTTCCGAGCTAC  
ATCAAGGAGAACCTGTGGAAGAAGACCAAGAAGCAGCAGATCGGCGAGAAGGAGTTCACGACCTGCTGCAGAGAAGAACCTGGAGATCTACGACA  
TGCTGCTGACCAAGCACAAGGACACCATCTACAAGAAGCGCCCAACAGCGCCACCATCGACATCCTGGTGAAGGGCAAGGAGAAGTCAAGAGCCT  
GATCATCGAGAACCAGTTCGAGGTGATCCTGGAGATCCTGAAGCTGTTACGCGCCACCCGCAACCTGAGCGACCTGCAGCACAACCTGGCGGCAAG  
TACAGCGCGTGGCCAAGATCGGCAACAAGATCAGCAGCTGGACAACCTGCATCCTGATCTACCAGAGCATCACCGGCATCTTCGAGAAGCGCATCG  
ACCTGCTGAAGGTGTAA

**Supplementary Note 4** | For the wild-type Cas9 two versions were created: one bearing a single NLS on the C-term of the protein, and another bearing a 3XNLS on the C-term of the protein. Both versions showed comparable activity, with the former used for experiments in the manuscript.

Sequences of the nuclease-null Cas9\_VP64 activator constructs are based on the quadruple mutants detailed in the Online Methods. For each ortholog two versions were created: one bearing a NLS on the C-term of the protein, and another bearing an NLS on both the C-term and N-term of the protein. Both versions showed comparable activity, with the former used for experiments in the manuscript.

(NLS and VP64 domains are highlighted).

>Cas9<sup>SP</sup>

```
gccaccATGGACAAGAAGTACTCCATTGGGCTCGATATCGGCACAACAGCGTCGGCTGGGCCGTCATTACGGACGAGTACAAGGTGCCGAGCAAAA
AATTCAAAGTTCTGGGCAATACCGATCGCCACAGCATAAAGAAGAACCCTATTGGCGCCCTCCTGTTTCGACTCCGGGAGACGGCCGAAGCCACGCG
GCTCAAAAAGAACGACCGCGCAGATATACCCCGAGAAAGAATCCGATCTGCTACCTGCAGGAGATCTTTAGTAATGAGATGGCTAAGGTGGATGAC
TCTTTCTTCCATAGCTAGGCTCCTTTTGGTGGAGGAGGATAAAAAGCAGCAGCGCCACCCAAATCTTTGGCAATATCGTGGCAGAGTGGCCG
ACCATGAAAAGTACCCAAACCATATATCATCTGAGGAAGAAGCTTGTAGACAGTACTGATAAGGCTGACTTGGCGTTGATCTATCTCGCGTGGCGCA
TATGATCAAATTTCCGGGACACTTCCTCATCGAGGGGACCTGAACCCAGACAACAGCGATGTCGACAACTCTTTATCCAACCTGGTTCAGACTTAC
AATCAGCTTTTCGAAGAGAACCCTGATCAACGCATCCGGAGTTGACGCCAAAGCAATCCTGAGCGCTAGGCTGTCCAAATCCCGGGCGGTCGAAAACC
TCATCGCACAGCTCCCTGGGAGAGAAGAAGACGGCCTTGTGGTAATCTTATCGCCCTGTCACTCGGGGTGACCCCAACTTTAAATCTAATCTCGA
CCTGGCCGAAGATGCCAAGCTTCAACTGAGCAAAGACACCTACGATGATGATCTCGACAATCTGCTGGCCAGATCGGCGACCAAGTACGACAGACCTT
TTTTGGGGCAAAGAACCCTGTAGACGCCATCTGCTGAGTGATATCTGCGAGTGAACACGGAGATCACCAAAGCTCCGCTGAGCGCTAGTATGA
TCAAGCGCTATGATGAGCACCACCAAGACTTTGCTGTAAGGCCCTTGTGACACAGCAACTGCCTGAGAAGTACAAGGAAATTTTCTTCGATCA
GTCTAAAAATGGTACCGCGATACATTGACGGCGGAGCAAGCCAGGAGAAATTTTACAAATTTATTAAGCCATCTTGAAAAAATGGACGGCACCC
GAGGAGCTGCTGGTAAAGCTTAAACAGAGAAGATCTGTTGCGCAAAACAGCGCACTTTTCGACAATGGAAGCATCCCCACAGATTCACCTGGGCGAAC
TGCACGCTATCCTCAGGGCAAAGAGGATTTCTACCCCTTTTTGAAAGATAACAGGAAAAGATTGAGAAAATCCTCACATTTTCGGATACCCCTACTA
TGTAGGCCCTCGCCCGGGAAATTCAGATTCGCGTGGATGACTCGCAAAATCAGAAGAGACCATCACTCCCTGGAACCTCGAGGAAGTTCGTGGAT
AAGGGGGCTCTGCCAGTCTTTCATCGAAAGGATGACTAATTTGATAAAAACTGCCTAACGAAAAGGTGCTTCTTAAACACTCTCTGCTGTACG
AGTACTTCACAGTTTATAACGAGCTCACCAAGGTCAAATACGTCACAGAAGGGATGAGAAAAGCCAGCATTCCTGTCTGGAGAGCAGAAGAAAGCTAT
CGTGGACCTCCTCTTCAAGACGAACCGGAAAGTTACCGTGAACAGCTCAAAGAAGACTATTTCAAAAAGATTGAATGTTTCGACTCTGTTGAAATC
AGCGGAGTGGAGGATCGCTTCAACGCATCCCTGGGAACGTATCACGATCTCCTGAAAATCATTAAGACAAGGACTTCTGGACAATGAGGAGAACC
AGGACATCTTGGAGCATTTGCTCCTCACCTTACGTTGTTGAAGATAGGGAGATGATTAAGAACGCTTGAAAATCTACGCTCATCTCTTCGACGA
CAAAGTCATGAAACAGCTCAAAGCGCCGATATACAGGATGGGGCGGCTGTCAAGAAAATGATCAATGGGATCCGAGACAAGCAGAGTGGAAAG
ACAATCCTGGATTTTCTTAAGTCCGATGGATTTGCCAACCGGAACCTCATGCAGTTGATCCATGATGACTCTCTCACCTTTAAGGAGGACATCCAGA
AAGCACAAGTTTCTGGCCAGGGGACAGTCTTTCACGAGCACATCGCTAATCTTGCAGGTAGCCAGCTATCAAAAAGGGAATACTGCAGACCGTTAA
GGTCGTGGATGAACTCGTCAAAGTAATGGGAAGGCATAAGCCCGAGAATATCGGTTATTCGAGATGGCCCGAGAGAACCAAAATACCCAGAAGGGACAG
AAGAACAGTAGGGAAAGGATGAAGAGGATTGAAGAGGGTATAAAAAGACTTGGGGTCCCAAAATCCTTAAGGAACACCCAGTTGAAAAACACCCAGCTTC
AGAATGAGAAGCTCTACCTGTACTACCTGCAGAACGGCAGGGACATGTACGTGGATCAGGAACGGACATCAATCGGCTCTCCGACTACGACGTGGA
TCATATCGTGCCCGAGTCTTTTCTCAAAGATGATTTCTATTGATAATAAAGTGTGACAAGATCCGATAAAAAATAGAGGGAAGAGTGATAACGTCCCC
TCAGAAGAAGTTGTCAAGAAAATGAAAAATTTTGGCGGCAGCTGCTGAACGCCAAATGATCACACAACGGAAAGTTCGATAATCTGACTAAGGCTG
AACGAGGTGCTGCTGAGCTTGGATAAAGCCGGCTTGCATAAAGCCAGCTGTGTTGAGACACGCGAGATCAACCAAGCAGCTGGCCCAAAATCTCGA
TTCACGCATGAACACCAAGTACGATGAAAATGACAACTGATTCGAGAGGTGAAAGTTATTACTCTGAAGTCTAAGCTGGTCTCAGATTTAGAAAAG
GACTTTTCAGTTTTATAAGGTGAGAGAGATCAACAATTAACCACCATGCGCATGATGCCACCTGAATGCAGTGGTAGGCACTGCACTTATCAAAAAAT
ATCCCAAGCTTGAATCTGAATTTGTTTACGGAGACTATAAAGTGTACGATGTTAGGAAAATGATCGCAAAGTCTGAGCAGGAAATAGGCAAGGCCAC
CGCTAAGTACTTCTTTTACAGCAATATATGAATTTTTTCAAGACAGATTAACACTGGCCAAATGGAGAGATTCGGAAAGGATTCGGAAGGCAACTTATCGAAACA
AACGGAGAAACAGGAGAAATCGTGTGGGACAAGGGTAGGGATTTTCGCGACAGTCCGGAAGGTCCTGTCCATGCCGAGGTGAACATCGTTAAAAAGA
CCGAAGTACAGACCGGAGGCTTCTCAAAGGAAAGTATCCTCCGAAAAGGAACAGCGACAAGCTGATCGCACGCAAAAAAGATTGGGACCCCAAGAA
ATACGGCGGATTCGATTTCTCCTACAGTCTGTTACAGTGTACTGGTTGTGGCCAAAGTGGAGAAAGGGAAGTCTAAAAAACTCAAAGCGTCAAGGAA
CTGCTGGGCATCACAATCATGGAGCGATCAAGCTTCGAAAAAAACCCATCGACTTTCTCGAGGCGAAAGGATATAAAGAGGTTCAAAAAAGACCTCA
TCATTAAGCTTCCCAAGTACTCTCTCTTTGAGCTTGA AAAACGGCCGAAAACGAATGCTCGCTAGTGCGGGCGAGCTGCAGAAAAGGTAACGAGCTGGC
ACTGCCCTCTAAATACGTTAATTTCTTGTATCTGGCCAGCCACTATGAAAAGTCAAAGGGTCTCCCGAAGATAATGAGCAGAAAGCAGCTGTTCTGTT
GAACAACACAACACTACCTTGTATGAGATCATCGAGCAAAATAGCGAATTTCTCAAAGAGTGTATCTCGCCGACGCTAACCTCGATAAGGTGCTTT
CTGCTTACAATAAGCACAGGATAAAGCCATCAGGGAGCAGGACAGAAACACTTGTCTTACTCTGACCAACTTGGGCGCCGCTCGAGCCTT
CAAGTACTTCGACACCACATAGACAGAAAGCGGTACACCTCTACAAGGAGGTCCTGGACGCCACACTGATTCATCAGTCAATTACGGGCTCTAT
GAAACAAGAAATCGACCTCTCTCAGCTCGGTGGAGACAGCAGGGCTGACCCCAAGAAGAAGAGGAGGTTGA
```

>Cas9<sup>SP</sup>3XNLS

```
gccaccATGGACAAGAAGTACTCCATTGGGCTCGATATCGGCACAACAGCGTCGGCTGGGCCGTCATTACGGACGAGTACAAGGTGCCGAGCAAAA
AATTCAAAGTTCTGGGCAATACCGATCGCCACAGCATAAAGAAGAACCCTATTGGCGCCCTCCTGTTTCGACTCCGGGAGACGGCCGAAGCCACGCG
```

GCTCAAAAAGAACAGCAGCGGCGAGATATACCCGCGAAAAGAAATCGGATCTGCTACCTGCAGGAGATCTTTAGTAATGAGATGGCTAAGGTGGATGAC  
TCTTTCTCCATAGGCTGGAGGAGTCCCTTTTGGTGGAGGAGGATAAAAAGCAGCAGCGCCACCCAATCTTTGGCAATATCGTGGACGAGGTGGCGT  
ACCATGAAAAGTACCCCAACCATATATCATCTGAGGAAGAAGCTGTGAGACACTGATGATAAGGCTGACTTGGGTTGATCTATCTCGCGTGGCGCA  
TATGATCAAATTTTCGGGGACACTTCCTCATCGAGGGGACCTGAACCCAGACAACAGCGATGTCGACAAACTTTTATCCAACCTGGTTCAGACTTAC  
AATCAGCTTTTCGAAGAGAACCAGATCAACGCATCCGGAGTTGACGCCAAAGCAATCTGAGCGCTAGGCTGTCCAAATCCCGGGCGGCTCGAAAACC  
TCATCGCACAGCTCCCTGGGAGAAGAAGAACGGCCTGTTGGTAATCTTATCGCCCTGTCACTCGGGCTGACCCCAACTTTAAATCTAACTTCGA  
CCTGGCCGAAGTCCCAAGTCAACTGAGCAAAGACACCTACGATGATGATCTCGACAATCTGCTGGCCAGATCGGGGACCAAGTACGCGACCTT  
TTTTTGGCGGCAAGAACCTGTCAAGACCCATTTCTGCTGAGTGATATTTCTGCGAGTGAACACGGAGATCACCAAAGCTCCGCTGAGCGCTAGTATGA  
TCAAGCGCTATGATGAGCACCACCAAGACTTGACTTTGCTGAAAGCCCTTGTGAGACGCAACTGCCTGAGAAGTACAAGGAAATTTTCTTCGATCA  
GTCTAAAAATGGCTACGCCGGATACATTGACGGCGGAGCAAGCCAGGAGAAATTTTACAAATTTATTAAGCCCATCTTGGAAAAAATGGACGGCACC  
GAGGAGCTGCTGGTAAAGCTTAACAGAGAAGATCTGTTGCGCAACACGCGCACTTTGACAATGGAAGCATCCCCACCAGATTCACCTGGGCGAAC  
TGCACGCTATCCTCAGCGCGCAAGAGGATTTTACCCCTTTTTGAAAAGATAACAGGAAAAGATTGAGAAAACTCCACATTTTCGGATACCCCTACTA  
TGTAGGCCCTCGCCGGGAAATTCAGATTCGCGTGGATGACTCGCAATCAGAAGAGACCATCACTCCCTGGAACCTCGAGGAAGTCTGTTGAAATC  
AAGGGGGCTCTGCCAGTCTTCATCGAAAAGGATGACTAATTTGATAAAAACTGCTTAACGAAAAGGTGCTTCCATAAACACTCTCTGCTGTACG  
AGTACTTACAGTTTATAACGAGCTCACAAGGTCAAATACGTCACAGAAGGATGAGAAAAGCCAGCATTCCTGTCTGGAGAGCAGAAGAAAGCTAT  
CTGGGACCTCCTCTTCAAGCAGAAAGTACCCGTGAAACAGCTTACCCCTTTTTGAAAAGATAACAGGAAAAGATTGAGAAAACTCCACATTTTCGAAATC  
AGCGGAGTGGAGGATCGCTTCAACGCATCCCTGGGAACGTATCAGCATCTCCTGAAAAATCATTAAGACAAGGACTTCTGGACAATGAGGAGAACG  
AGGACATTTTGGAGACATTTGCTCCTCACCTTACGTTGTTGAAAGATAGGGAGATGATTGAAGAACGCTTGAAGAACTTACGCTCATCTCTCGACGA  
CAAAGTCAATGAACAGCTCAAGAGCGCCGATATACAGGATGGGGCGGCTGTCAAGAAAACCTGATCAATGGGATCCGAGACAAGCAGAGTGGAAAAG  
ACAATCCTGGATTTTCTTAAGTCCGATGGATTTGCCAACCGAACTTATGAGAGGTTGATCCATGACTCTCTCACATTTAAGGAGGACATCCAGA  
AAGCACAAGTTTCTGGCCAGGGGACAGTCTTACAGGACACATCGCTAATCTTGCAGGTAGCCAGCTATCAAAAAGGGAATACTGCAGACCGTTAA  
GGTCGTGGATGAACTCGTCAAAGTAATGGGAAGGCATAAGCCCGAGAATATCGTTATCGAGATGGCCCGAGAGAACCAAAACCTCCAGAAGGGACAG  
AGAACAGTAGGGAAGGATGAAGAGGATTAAGAGGGTATAAAAAGAACTGGGGTCCCAATCCTTAAGGAACACCCAGTTGAAAACACCCAGCTTC  
AGAAAGAGAAGCTTACCTGTACTACCTGCAGAACCGCAGGGACATGTACGTGGATCAGGAACTGGACATCAATCGGCTCTCCGACTACGACGTGGA  
TCATATCGTGGCCAGCTTTTTCTCAAAGATGATTCTATTGATAATAAAGTGTGACAAGATCCGATAAAAAATAGAGGGAAGAGTGATAACGTTCCCT  
TCAGAAGAGTTGTCAAGAAAATGAAAAATTTATGGCGGCAGCTGCTGAACGCCAAAACCTGATCACACAACGGAAAGTTCGATAATCTGACTAAGGCTG  
AACGAGGTGGCCTGTCTGAGTTGGATAAAGCCGGCTTCATCAAAGGCAGCTTGTGAGACACGCCAGATCACAAGCAGCTGGCCAAAATTTCTCGA  
TTCACGCATGAACACAAAGTACGATGAAAATGACAAAACCTGATTCGAGAGGTGAAAGTATTACTCTGAAAGCTAAGCTGGTCTCAGATTTTCAGAAAAG  
GACTTTCAGTTTTATAAGGTGAGAGAGATCAACAATTAACACCATGCGCATGATGCCTACCTGAATGCAGTGGTAGGCACTGCCTTATCAAAAAAT  
ATCCCAAGCTTGAATCTGAATTTGTTTACGGGAGACTATAAAGTGTACGATGTTAGGAAAATGATCGCAAAAGTCTGAGCAGGAAATAGGCAAGGCCAC  
CGTAAGTACTTCTTTTACAGCAATATTTATGAATTTTTTCAAGACCGAGATTACACTGGCCAAATGGAGAGATTTCGGAAGCGACCACTTATCGAAAACA  
AACGGGAAAACAGGAGAATCTGTGTGGGACAAGGGTAGGGATTTTCGCGACAGTCCCGGAAAGTCTGTCCATGCGCGAGCTGCAAGAAAGTAAACGAGTGGC  
CCGAAGTACAGACCGGAGGCTTCTCCAAGGAAAGTATCCTCCCGAAAAGAACAGCGACAAGCTGATCGCACGCAAAAAAGATTGGGACCCCAAGAA  
ATACGGCGGATTCGATTTCTTACAGTCTGTTACAGTGTACTGGTTGTGGCCAAAAGTGGAGAAAGGGAAGTCTAAAAAACTCAAAGCGTCAAGGAA  
CTGCTGGGCATCACAATCATGAGCGATCAAGCTTCGAAAAAAACCCCATCGACTTTCTCGAGGGCAAAGGATATAAAGAGGTCAAAAAAGACCTCA  
TCATTAAGCTTCCCAAGTACTCTCTTTGAGCTTGAAAAACCGCCGAAACGAATGCTCGCTAGTGGCGGAGCTGCAAGAAAGTAAACGAGTGGC  
ACTGCCCTCTAAATACGTTAATTTCTTGTATCTGGCCAGCCATGAAAAGCTCAAAGGGTCTCCCGAAGATAATGAGCAGAAGCAGCTGTTCTGTG  
GAACAACACAAACACTACCTTGATGAGATCATCGAGCAAAATAGCGAATTTCTCCAAAAGAGTATCCTCGCCGACGCTAACCTCGATAGGTTGCTTT  
CTGCTTACAATTAAGCACAGGATAAGCCCATCAGGGAGCAGGCAAAAACATTACCACTGTTTACTCTGACCAACTTGGGCGGCTGCGACCTT  
CAAGTACTTCGACACCCTGACAGACAGAAAGCGGTACACCTCTACAAAAGGAGTCTCGGACGCCACACTGATTCATCAGTCAATACGGGCTCTAT  
GAAAACAAGAAATCGACCTCTCTCAGCTCGGTGGAGAGCGGGCCGAGATCCAAAAAAGAAAGAGAAAGGTAGATCCAAAAAAGAAAGAAAGGTAGATC  
CAAAAAAGAAAGAAAGGTAGATACGGCCGATAG

>Cas9<sup>SP</sup> VP64  
m4

gccaccATGGACAAGAAGTACTCCATTGGGCTCGTATCGGCACAACAGCGTGGCTGGGCCGTCATTACGGACGAGTACAAGGTGCCGAGCAAAA  
AATTCAAAGTTCTGGCAATACCGATCGCCACAGCATAAAGAAGAACCTCATTGGCGCCCTCTGTTCGACTCCGGGAGACGGCCGAAGCCACGCG  
GCTCAAAAAGAACAGCAGCGGCGAGATATACCCGCGAAAAGAAATCGGATCTGCTACCTGCAGGAGATCTTTAGTAATGAGATGGCTAAGGTGGATGAC  
TCTTTCTCCATAGGCTGGAGGAGTCCCTTTTGGTGGAGGAGGATAAAAAGCAGCAGCGCCACCCAATCTTTGGCAATATCGTGGACGAGGTGGCGT  
ACCATGAAAAGTACCCCAACCATATATCATCTGAGGAAGAAGCTGTGAGACACTGATGATAAGGCTGACTTGGGTTGATCTATCTCGCGTGGCGCA  
TATGATCAAATTTTCGGGGACACTTCCTCATCGAGGGGACCTGAACCCAGACAACAGCGATGTCGACAAACTTTTATCCAACCTGGTTCAGACTTAC  
AATCAGCTTTTCGAAGAGAACCAGATCAACGCATCCGGAGTTGACGCCAAAGCAATCTGAGCGCTAGGCTGTCCAAATCCCGGGCGGCTCGAAAACC  
TCATCGCACAGCTCCCTGGGAGAAGAAGAACGGCCTGTTGGTAATCTTATCGCCCTGTCACTCGGGCTGACCCCAACTTTAAATCTAACTTCGA  
CCTGGCCGAAGATGCCAAGCTTCAACTGAGCAAAGACACCTACGATGATGATCTCGACAATCTGCTGGCCAGATCGGGGACCAAGTACGCGACCTT  
TTTTTGGCGGCAAGAACCTGTCAAGACCCATTTCTGCTGAGTGATATTTCTGCGAGTGAACACGGAGATCACCAAAGCTCCGCTGAGCGCTAGTATGA  
TCAAGCGCTATGATGAGCACCACCAAGACTTGACTTTGCTGAAAGCCCTTGTGAGACGCAACTGCCTGAGAAGTACAAGGAAATTTTCTTCGATCA  
GTCTAAAAATGGCTACGCCGGATACATTGACGGCGGAGCAAGCCAGGAGAAATTTTACAAATTTATTAAGCCCATCTTGGAAAAAATGGACGGCACC  
GAGGAGCTGCTGGTAAAGCTTAACAGAGAAGATCTGTTGCGCAACACGCGCACTTTGACAATGGAAGCATCCCCACCAGATTCACCTGGGCGAAC  
TGCACGCTATCCTCAGCGGCAAGAGGATTTTACCCCTTTTTGAAAAGATAACAGGAAAAGATTGAGAAAACTCCACATTTTCGGATACCCCTACTA  
TGTAGGCCCTCGCCGGGAAATTCAGATTCGCGTGGATGACTCGCAATCAGAAGAGACCATCACTCCCTGGAACCTCGAGGAAGTCTGTTGATG  
AAGGGGGCTCTGCCAGTCTTCATCGAAAAGGATGACTAATTTGATAAAAACTGCTTAACGAAAAGGTGCTTCCATAAACACTCTCTGCTGTACG  
AGTACTTCAAGTTTATAACGAGCTCACAAGGTCAAATACGTCACAGAAGGATGAGAAAAGCCAGCATTCCTGTCTGGAGACCAAGAAAGTAAAG  
CGTGGACCTCCTCTTCAAGCAGAACCGGAAAGTTACCGTGAACAGCTCAAAGAAGACTATTTCAAAAAGATTGAATGTTTCGACTCTGTTGAAATC  
AGCGGAGTGGAGGATCGCTTCAACGCATCCCTGGGAACGTATCAGCATCTCCTGAAAAATCATTAAGACAAGGACTTCTGGACAATGAGGAGAACG  
AGGACATTTTGGAGACATTTGCTCCTCACCTTACGTTGTTGAAAGATAGGGAGATGATTGAAGAACGCTTGAAGAACTTACGCTCATCTCTCGACGA  
CAAAGTCAATGAACAGCTCAAGAGCGCCGATATACAGGATGGGGCGGCTGTCAAGAAAACCTGATCAATGGGATCCGAGACCAAGCAGAGAAAG  
ACAATCCTGGATTTTCTTAAGTCCGATGGATTTGCCAACCGAACTTATGCAAGTGTATCCATGATGACTCTCTCACCTTTAAGGAGGACATCCAGA



AAGCACAAGTTTCTGCCAGGGGACAGTCTTACGAGCACATCGCTAATCTTGCAGGTAGCCCGAGCTATCAAAAAGGGAATACTGCAGACCGTTAA  
GGTCGTGGATGAATCGTCAAAGTAATGGGAAGGCATAAGCCCGAGAATATCGTTATCGAGATGGCCCGAGAGAACCAAACTACCCAGAAGGGACAG  
AAGAACAGTAGGAAGGATTGAAGAGGATTGAAGAGGATTAAGAGATCGGCTCCCAAATCCTTAAGGAACCCAGTTGAAAACACCCAGCTTC  
AGAATGAGAAGCTTACTGTACTACCTGCAGAACGGCAGGATGTACGTGGATCAGGAACGGACATCAATCGGCTCTCCGACTACGACGTGGC  
TGCATCGTGCCCGAGTCTTTCTCAAAGATGATTCTATTGATAATAAAGTGTGACAAGATCCGATAAAgcTAGAGGGAAGAGTGATAACGTCCCC  
TCAGAAGAAGTTGTCAAGAAAATGAAAATTTATGGCGGCAGCTGTGAACGCCAAAATGATCACACAACGGAAAGTTTCGATAATCTGACTAAGGGCTG  
AACGAGGTGGCTGTCTGAGTTGGATAAAGCCGGCTTCATCAAAGGCAGCTTGTGAGACACGCCAGATCACCAAGCACGTGCCCCAAATTTCTCGA  
TTCACGCATGAACACCAAGTACGATGAAAATGACAAAATGATTTCGAGAGGTGAAAATTATTACTCTGAAGTCTAAGCTGGTCTCAGATTTAGAAAAG  
GACTTTTCAAGTTTATAAGGTGAGAGAGATCAACAATTACCACCATGCGCATGATGCCCTACCTGAATGCAGTGGTAGGCACTGCACTTATCAAAAAT  
ATCCCAAGCTTGAATCTGAATTTGTTTTACGGGAGACTATAAAGTGTACGATGTAGGAAAATGATCGCAAAGTCTGAGCAGGAAATAGGCAAGGCCAC  
CGTAAGTACTTTCTTTACAGCAATATTATGAATTTTTTCAAGACCGGATTAACCTGGCCAAATGGAGAGATTGCGAAGCCACCCTTATCGAAACA  
AACGGAGAAAACCGAGCAATCTCTCTTTGAGCTTGAAGACGGCCGGAACGAAAGTGTCCGGAAGTCTGTCATGCCGAGGTGAACTCGTTAAAAGA  
CCGAAGTACAGACCGGAGGCTTCTCAAAGGAAATATCTCCCGAAAAGAACAGCGACAAGCTGATCGCACGAAAAAGATTTGGGACCCCAAGAA  
ATACGGGGGATTCGATTCCTACAGTCTGTTACAGTGTACTGGTTGTGGCCAAAGTGGAGAAAGGGAAGTCTAAAAAATCAAAAAGCGTCAAGGAA  
CTGCTGGGCATCAATCATGGAGCGATCAAGCTTCGAAAAAAACCCCATCGACTTTCTGAGGCGAAAGGATATAAAGAGGTCAAAAAGACCTCA  
TCATTAAGCTTCCCAAGTACTCTCTCTTTGAGCTTGAAGACGGCCGGAACGAAAGTGTCCGACGCCACACTGATTCATCAATACGGGGCTTAT  
ACTGCCCTCTAAATACGTTAATTTCTTGTATCTGGCCAGCCACTATGAAAAGCTCAAAGGGTCTCCCGAAGATAATGAGCAGAAGCAGCTGTTCTGTG  
GAACAACACAACACTACCTTGATGAGATCATCGAGCAAAATAGCGAATTTCTCCAAAAGAGTATCTCGCCGACGCTAACCTCGATAAGGTGCTTT  
CTGCTTACAATAAGCACAGGGATAAGCCCATCAGGGAGCAGGCAGAAAACATTATCCACTGTTTACTCTGACCAACTTGGGCGGCCCTGCAGCCTT  
CAAGTACTTCGAGGAGAACTCGACAGAAAGCGGTACACTCTACAAGAGAGGTCTGGACGCCACACTGATTCATCAATACGGGGCTTAT  
GAAACAAGAAATCGACCTCTCTCAGCTCGGTGGAGACAGCAGGGCTGACCCCAAGAAGAAGAGGAAGGTTGGAGGCCAGCGTTCCGGACGGGCTGACG  
CATTTGGAGCATTTTGTATCGGATATGCTGGGAAGTGAAGCCCTCGATGATTTTGCACCTTGACATGCTTGGTTGCGATGCCCTTGATGACTTTGACCT  
CGACATGCTCGGACGAGTACGCCCTTGATGATTTTCGACCTGGACATGCTGATTAACCTCTAGATGA

>Cas9<sup>SP</sup> VP64<sub>m4</sub><sub>N</sub>

gccaccATGCCCAAGAAGAGGAGGAGGTTGGGAAGGGGGATGGACAAGAAGTACTCCATTGGGCTCGTATCGGCCAACAACAGCGTCGGCTGGGCCG  
TCATTACGGCAGGATCAAGGTGCCGAGCAAAAATTCAAAGTTCGGGCAATACCGCATCGCCACAGCATAAAGAAGAACCTCATGGCGCCCTCTCT  
GTTTCGACTCCGAGGAGCCAGCGGCTCAAAGATTAAGAGACAGCGGATATACCCCGCAGAAAAGAAATCGGATCTGCTACTGCAAGGAG  
ATCTTTAGTAATGAGATGGCTAAGGTGGATGACTCTTTCTTCCATAGGCTGGAGGAGTCTTTTGGTGGAGGAGGATAAAAAAGCAGGCGCCACC  
CAATCTTTGGCAATATCGTGGAGGAGGTGGCGTACCATGAAAAGTACCCAACCATATATCATCTGAGGAAGAAGCTTGTAGACAGTACTGATAAGGC  
TGACTTGGCGTTGATCTATCTCGCGCTGGCGCATATGATCAAAATTTCCGGGACACTTCTCTCATCGAGGGGACCTGAACCCAGACAACAGCAGTGT  
GACAACTCTTTTCAACTGGTTGAGCTTACAATCAGCTTTTTCGAGAGAACCCGATCAACGCATCCGGAGTTGACGCCAAAGCAATCCTGAGGC  
CTAGGCTGTCAAATCCCGCGGCTCGAAAACCTCATCGCACAGCTCCCTGGGAGAGAAGAAGCAGCGCTGTTTGGTAATCTTATCGCCCTGTCACT  
CGGGCTGACCCCAACTTTAAATCTAACTTCGACCTGGCCGAAGATGCCAAGTTCAACTGAGCAAAGACACCTACGATGATGATCTCGACAATCTG  
CTGGCCAGATCGGCGACAGTACGACAGCTTTTTTTTTGGCGCAAAGAACCTGTCCAGACGCCATTCTGTGAGTGATATTCTGCGAGTGAACACGG  
AGTACCAAAGCTCCGCTGAGCGCTAGTATGATCAAGCGCTATGATGAGCACCAAGACTTGACTTTGCTGAAAGCCCTTGTGACAGCACT  
GCTTGAAGTACAAGGAATTTCTTCGATCAGTCTAAAAATTTGGTACGCGGATACATTGACGGCGGAGCAAGCCAGGAGAAATTTACAAATTT  
ATTAAGCCCATCTTTGAAAAAATGGACGGCACCGAGGAGCTGCTGGTAAAGCTTAACAGAGAAGATCTGTTGCGCAACAGCGCACTTTCGACAATG  
GAAGCATCCCCACCAGATTTCACTGGCGCAACTGCACGCTATCTCAGGCGCAAGAGGATTTCTACCCCTTTTTGAAAGATAACAGGGAAAAAGAT  
TGAGAAAATCTCACATTTCCGATACCTACTATGTAGGCCCTTCCCGGGGAAATTCAGATTCGCGTGGATGACTCGCAAAATCAGAAGAGACC  
ATCACTCCTGAAACTTCGAGGAAGTCTGGATAAGGGGGCTCTGCCAGTCCCTTCACTCGAAAGGATGACTAACTTTGATAAAAAATCTGCCCTAACG  
AAAAGGTCTTCTAAACTCTCTGCTGTACGAGTACTTACAGTTTTATAACGAGCTCACCAAGGTCAAATACGTCACAGAAGGGATGAGAAAGCC  
AGCATTCCTGTCTGGAGAGCAGAAAGAGCTATCGTGGACCTCCTCTCAAGACGAACCGGAAAGTTACCGTGAACAGCTCAAAGAAGACTATTT  
AAAAAGATGAAATGTTTCGACTCTGTTGAAATCAGCGGAGTGGAGGATCGTTCAACGCATCCCTGGGAACGATACAGCATCTCTGAAAATCATT  
AAGACAAGGACTTCTTGCAAAATGAGGAGAACAGAGGACATTTCTGAGCAATTTGTTTACCGTACCCTTACGTTGTTGAGATAGGAGAGATGATGAAGA  
ACGCTTGAAAACCTACGCTCATCTCTTCGACGACAAGTCAAGAACAGCTCAAGAGGCGCCGATATACAGGATGGGGGGGCTGTCAAGAAAACCTG  
ATCAATGGGATCCGAGACAAGCAGAGTGAAGAAGACAATCTGGATTTCTTAAAGTCCGATGGATTTGCCAACCCGAACTTCATGCAAGTTGATCCATG  
ATGACTCTCTACCTTAAAGGAGACATCCAGAAAGCAAGTTTCTGGCCAGGGGACAGTCTTACGAGCACATCGCTAATCTTGCAGGTAGGCC  
AGCTATCAAAAAGGGAATCTGACAGCCGTAAAGTCTGAGTGAACCTCGTCAAAGTAAATGGGAAGGCATAAGCCCCGAGAATGCTGTTATCGAGATG  
GCCGAGAGAACCAACTACCCAGAAGGGACAGAAGAACAGTAGGAAAGGATGAAGAGGATTAAGAGGTTATAAAGAATGGGGTCCCAAATCC  
TTAAGCAACACCCAGTTGAAAACACCCAGCTTCAAGATGAGAAGCTCTACCTGTACTACCTGCAGAACGGCAGGGACATGTAGTGGATCAGGAAT  
GGACATCAATCGGCTCTCCGACTACGAGCTGGCTGTATCGTCCCGAGTCTTTCTCAAAGATGATTCTATTGATAATAAAGTGTGACAAGATCC  
GATAAAgcTAGAGGGAAGAGTGATAACCTCCCTCAGAAGAAGTTGTCAAGAAAATGAAAATTTATTGGCGGACGCTGCTGAACGCCAAATCGATCA  
CACAAACGGAAGTTTCGATAATCTGACTAAGGCTGAACAGGTTGGCTGTCTGAGTTGGATAAAGCCGGCTTCATCAAAGGCAGCTTGTGAGACAG  
CCAGATACCAAGCACGTGGCCCAAATCTCGATTACGCAATGAACCAAGTACGATGAAAATGACAAACTGATTCGAGAGGTGAAAGTTATTACT  
CTGAAGTCTAAGTGGTCTCAGATTTCAAGAAAGACTTTCAGTTTTATAAGGTGAGAGAGATCAACAATTACCACCATGCGCATGATGCCCTACCTGA  
ATCGAGTGGTAGCCTGCATATCAAAAATATCCCAAGCTTGAATCTGAATTTGTTTACGGAGCTATAAAGATGTACGATGTTAGGAAAATGAT  
CGCAAAGTCTGAGCAGGAAATAGGCAAGGCCACCGCTAAGTACTTCTTTACAGCAATATTAAGATTTTTCTCAAGACCGAGATTACTGGCCAAT  
GGAGAGATTTCGGAAGCGACCTTATCGAAAACAACCGGAGAAAACAGGAGAAATCGTGTGGGACAAGGTTAGGATTTTCGACAGCTCCGGAAGGTCC  
GTCTCATGCGCAGGTTGAACATCGTTAAAAGACCGAAGTACAGACCGGAGGCTTCTCAAAGGAAAGTATCTCCCGAAAAGGAAACAGCGACAAGCT  
GATCGCACGCAAAAAGATTTGGGACCCCAAGAAATACGGCGGATTCGATTCCTACAGTTCGTTTACAGTTCAGGTTACTAGTGTACTGTGGCCAAAGTGAAGA  
GGGAAGTCTAAAACACTCAAAGCGTCAAGGAAGTCTGGGATCACAAATCATGGAGCGATCAAGCTTCGAAAAAACCCTTCGACTTTCTCGAGG  
CGAAAGGATATAAAGAGGTCAAAAAAGACCTCATCATTAAGCTTCCCAAGTACTCTCTTTGAGCTTGAAAACGGCCGGAACGAATGCTCGCTAG  
TGGGGGGGAGCTGCAGAAAGGTAACGAGCTGGCACTGCCCTCAAAATACGTTAATTTCTTGTATCTGGCCAGCCACTATGAAAAGCTCAAAGGGTCT  
CCCGAAGATAATGAGCAGAGACTGTCTGCTGGAACACACAACACTACCTTGTAGATCATCGAGCAAAATAAGCGAATTTCTCCAAAAGGATGTA  
TCCTCGCCGACGCTAACCTCGATAAGGTGCTTTCTGCTTACAATAAGCACAGGGATAAGCCCATCAGGGAGCAGGCAGAAAACATTATCCACTTGT

TACTCTGACCAACTTGGGCGCGCTGCAGCCTTCAAGTACTTCGACACCACCATAGACAGAAAGCGGTACACCTCTACAAAGGAGGTCTGGACGCC  
ACACTGATTCATCAGTCAATTACGGGGCTCTATGAAACAAGAATCGACCTCTCTCAGCTCGGTGGAGACAGCAGGGCTGACCCCAAGAAGAAGAGGA  
AGGTGGAGCCAGCGGTTCGGACGGGTGACGCATTTGGACGATTTTATGATCTGGATATGCTGGGAAGTGACGCCCTCGATGATTTGACCTTGACAT  
GCTTGGTTCGGATCCCTTGATGACTTTGACCTCGACATGCTCGGCAGTACGCCCTTGATGATTTTCGACCTGGACATGCTGATTAACCTTAGATGA

### >Cas9<sup>ST1</sup>

gccaccATGAGCGACCTGGTGTGGGCCTGGACATCGGCATCGGCAGCGTGGGCGTGGGCATCCTGAACAAGGTGACCGGCGAGATCATCCACAAGA  
ACAGTTCGCATCTTCCCTGCTGCTCAGGCTGAGAACAACCTGGTGGCCGACCAACCAGGCTCGCCGGCTTGCTCGCCGCAAGAAGCACCAGGCG  
CGTGGCCCTGAACCGCCTGTTCCGAGGAGAGCGGCTGATCACCGACTTCACCAAGATCAGCATCAACCTGAACCCCTACCAGCTGCGCGTGAAGGGC  
CTGACCGACGAGTGGAGCAACGAGGAGTGTTCATCGCCCTGAAGAATGTTGTAAGCACCAGCGGCATCAGCTACCTGGACGACGCCAGCGACGAGC  
GCAACAGCAGCGTGGGCGACTACGCCAGATCGTGAAGGAGAACAGCAAGCAGCTGGAGACCAAGACCCCGCCAGATCCAGCTGGAGCGCTACCA  
GACCTACGGCCAGCTGCGCGGCGACTTACCCTGGAGAAGGACGGCAAGAAGCACCAGCTGATCAACGTGTTCCCCACCAGCGCCTACCGCAGCGAG  
GCCCTGGCATACTGACAGACCCAGCAGGAGTTCAACCCAGATCACCGACGAGTTCATCAACCGCTACCTGGAGATCCTGACCGCAAGCGCAAGT  
ACTACCAGGCCCCGGCAACGAGAAGAGCCGACCGACTACGGCCGCTACCGCACCAGCGGAGACCCCTGGACAACATCTTCGGCATCCTGATCGG  
CAAGTGCACCTTCTACCCCGACGAGTTCGCGCGCCGCAAGGCCAGCTACACCGCCAGGAGTTCACCTGCTGAACGACCTGAACAACCTGACCGTG  
CCCACCGAGACCAAGAAGCTGAGCAAGGAGCAGAAGAACCAGATCATCAACTACGTGAAGAACGAGAAGGCCATGGGCCCCGCAAGCTGTTCAAGT  
ACATCGCCAGACTGCTGAGCTGCGACCTGGCCGACATCAAGGGCTACCGCATCGACAAGAGCGGCAAGGCCGAGATCCACACCTTCGAGGCCATCCG  
CAAGATGAAGACCTGGAGACCTGGACATCGAGCAGATGGACCGGAGACCTGGACAAGCTGGCCTACGTGCTGACCTGAACACCGAGCGCGAG  
GGCATCCAGGAGGCCCTGGAGCAGGATTCGCGCAGCGCAGCTTCAGCCAGAAGCAGTGGACGAGCTGGTGCAGTTCGCAAGGCCAACAGCAGCA  
TCTTCGGCAAGGGCTGGCACAACCTTCAGCGTGAAGTGTGATGATGGAGTGTATCCCGAGCTGTACGAGACCAGCGAGGAGCAGATGACCATCTGAC  
CGCCCTGGCAAGCTGAGCAGCAGCAAGCAAGCAAGCAAGCAAGCAAGCAAGCAAGCAAGCAAGCAAGCAAGCAAGCAAGCAAGCAAGCAAGCAAG  
AAGAGCGTGGCCAGGCCATCAAGATCGTGAACGCCGATCAAGGAGTACGGCGACTTCGACAACATCGTGTGATCGAGATGGCCCGGAGACCAACG  
AGGACGACGAGAAGAAGGCCATCCAGAAGATCCAGAAGGCCAACAAGGACGAGAAGGACGCCGCCATGCTGAAGGCCCAACAGTACAACGGCAA  
GGCCGAGCTGCCCCACAGCGTGTTCACGGCCACAAGCAGCTGGCCACCAAGATCCGCTGTGGCACCAGCAGGGCGAGCGCTGCCTGTACACCGG  
AAGACCATCAGCATCCACGACCTGATCAACAACAGCAACCAGTTCGAGGTGGACCAATCCTGCCCTGAGCATCACCTTCGACGACAGCAGCTGGCCA  
ACAAGGTGCTGGTGTACGCCACCGCCAAACCAGGAGAAGGGCCAGCGCACCCCTACCAGGCCCTGGACAGCATGGACGACGCTGGAGCTTCCGCGA  
GCTGAAGGCCCTCGTGGCGGAGAGCAAGACCTGAGCAACAAGAAGAGGAGTACCTGCTGACCGAGGAGACATCAGCAAGTTCGACGCTGGCGCA  
AAGTTCATCGAGCGCAACCTGGTGGACACCCGCTACGCCAGCCGCTGGTGTGAACGCCCTGCAGGAGCACTTCGCGGCCACAAGATCGACACCA  
AGGTGAGCGTGGTGGCGGCCGTTTACCAGCCAGCTGCGCCGCCACTGGGGCATCGAGAAGACCCGCGACACTACCACCAACCGCGCTGGACGC  
CCTGATCATTGCGGCTTCTAGCCAGCTGAACCTGTGGAAGAAGCAGAAGAACCCTGGTGGAGTACAGCGAGGACCAGCTGCTGGACATCGAGACC  
GGCGAGCTGATACGCGAGCAGAGTACAGGAGAGCGTGTTCAGGCCCTACCAGCACTTCGTTGGACACCCCTGAAGAGCAAGGAGTTCGAGGACA  
GCATCCTGTTAGCTACAGGTTGGACAGCAAGTTCACCCCAAGATCAGCGACGCCACCATCTACGCCACCCGCCAGGCCAAGGTGGGCAAGGACAA  
GGCCGAGGAGCAAGTACGATCGGCAAGATCAAGGACATCTACACCCAGGACGCTACGACGCTTCATGAAGATCTACAAGAGGCAAGAGCAAG  
TTCTGATGTACGCCACGACCCCGACCTTCGAGAAGGTGATCGAGCCATCCTGGAGAATACCCCAACAAGCAGATCAACGATAAAGGCAAGG  
AGGTGCCCTGCAACCCCTTCTGAAGTACAAGGAGGAGCAGGCTACATCCGCAAGTACAGCAAGAAGGGCAAGCGCCCGAGATCAAGAGCCTGAA  
GTACTACGACAGCAAGCTGGGCAACCAATCGACATCACCCCAAGGACAGCAACAACAAGTGGTGTGTCAGAGCGTGGAGCCCTGGCGCGCCGAC  
GTGATCTTCAACAAGACCAACGAGAAGAGCCGACCCAGTACGAGTCCCTGGGCTGAGTACCGCCAGCTGCAAGTTCGATGATAAGGGCACCGGCAAC  
AGGAGAAGTACAACGACATCAAGAAGAAGGAGGCGTGGACAGCGACAGCGAGTTCAGGTTACCCCTGTACAAGAACGACCTTCTGCTGGTGAAGGA  
CACCGAGACCAAGGAGCAACAGTGTTCGCTTCTGAGCCGACCATGCCAAGCAGAAGCACTACGTGGAGCTGAAGCCCTACGACAGCAGAAG  
TTCGAGGGCGGCGAGGCCCTGATCAAGTGTGGGCAACGTCGCAACAGCGCCAGTTCGAAGAAGGCCCTGGGCAAGAGCAACATCAGCATCTACA  
AGGTGCGCACCAAGCTGCTGGCAACAGCAGATCATCAAGAACGAGGGCGACAAGCCCAAGTGGACTTCAGCAGGGCTGACCCCAAGAAGAAGAG  
GAAGGTGCTGA

### >Cas9<sup>ST1</sup>3XNLS

gccaccATGAGCGACCTGGTGTGGGCCTGGACATCGGCATCGGCAGCGTGGGCGTGGGCATCCTGAACAAGGTGACCGGCGAGATCATCCACAAGA  
ACAGTTCGCATCTTCCCTGCTGCTCAGGCTGAGAACAACCTGGTGGCCGACCAACCAGGCTCGCCGGCTTGCTCGCCGCAAGAAGCACCAGGCG  
CGTGGCCCTGAACCGCCTGTTCCGAGGAGAGCGGCTGATCACCGACTTCACCAAGATCAGCATCAACCTGAACCCCTACCAGCTGCGCGTGAAGGGC  
CTGACCGACGAGTGGAGCAACGAGGAGTGTTCATCGCCCTGAAGAATGTTGTAAGCACCAGCGGCATCAGCTACCTGGACGACGCCAGCGACGAGC  
GCAACAGCAGCGTGGGCGACTACGCCAGATCGTGAAGGAGAACAGCAAGCAGCTGGAGACCAAGACCCCGCCAGATCCAGCTGGAGCGCTACCA  
GACCTACGGCCAGCTGCGCGGCGACTTACCCTGGAGAAGGACGGCAAGAAGCACCAGCTGATCAACGTGTTCCCCACCAGCGCCTACCGCAGCGAG  
GCCCTGGCATACTGACAGACCCAGCAGGAGTTCAACCCAGATCACCGACGAGTTCATCAACCGCTACCTGGAGATCCTGACCGGCAAGCGCAAGT  
ACTACCAGGCCCGGCAAGCAGAGAAGAGCCGACCCAGTACGCTGAGGCTGAGTACCGGACCGGCGAGACCTGGACAACATCTTCGGCATCTGATCGG  
CAAGTGCACCTTCTACCCCGACGAGTTCGCGCGCCGCAAGGCCAGCTACACCGCCAGGAGTTCACCTGCTGAACGACCTGAACAACCTGACCGTG  
CCCACCGAGACCAAGAAGCTGAGCAAGGAGCAGAAGAACCAGATCATCAACTACGTGAAGAACGAGAAGGCCATGGGCCCCGCAAGCTGTTCAAGT  
ACATCGCCAAAGTGTGAGTTCGCGACCTGGCCGACATCAAGGGCTACCGCATCGACAAGAGCGGCAAGGCCGAGATCCACACCTTCGAGGCCATCCG  
CAAGATGAAGACCTGGAGACCTGGACATCGAGCAGATGGACCGGAGACCTGGACAAGCTGGCCTACGTGCTGACCTGAACACCGAGCGCGAG  
GGCATCCAGGAGGCCCTGGAGCAGGATTCGCGCAGCGCAGCTTCAGCCAGAAGCAGGTTGGACGAGCTGGTGCAGTTCGCGCAAGGCCAACAGCAGCA  
TCTTCGGCAAGGGCTGGCACAACCTTCAGCGTGAAGTGTGATGATGGAGTGTATCCCGAGCTGTACGAGACCAGCGAGGAGCAGATGACCATCTGAC  
CCGCTGGGCAAGCAGAGAAGACCAAGCAGCAGCAACAAGACCAAGTACATCGACGAGAAGTGTGACCGAGGAGATCTACAACCCCGTGGTGGCC  
AAGAGCGTGGCCAGGCCATCAAGATCGTGAACGCCGATCAAGGAGTACGGCGACTTCGACAACATCGTGTGATCGAGATGGCCCGGAGACCAACG

AGGACGACGAGAAGAAGGCCATCCAGAAGATCCAGAAGGCCAACAAAGGACGAGAAGGACGCCGCCATGCTGAAGGCCGCCAACAGGTACAACGGCAA  
GGCCGAGCTGCCCCACAGCGTGTTCACGGCCACAAGCAGCTGGCCACCAAGATCCGCTGTGGCACCAGCAGGGCGAGCGCTGCCTGTACACCGGC  
AAGACCATCAGCATCCACGACCTGATCAACAACAGCAACCAGTTCGAGGTGGACCACATCCTGCCCTGAGCATCACCTTCGACGACAGCCTGGCCA  
ACAAGGTGCTGGTGTACGCCACCGCCAACCAGAGAAGGGCCAGCGCACCCCTACCAGGCCCTGGACAGCATGGACGACGCTGGAGCTTCCGCGA  
GCTGAAGGCCCTTCGTGCGGAGAGCAAGACCCTGAGCAACAAGAAGAAGGAGTACCTGCTGACCGAGGAGACATCAGCAAGTTCGACGTGCGCAAG  
AAGTTCATCGAGCGCAACCTGGTGGACACCCGCTACGCCAGCCGCGTGGTGTGAACGCCCTCGAGGAGCACTTCCGCGCCCAACAAGATCGACACCA  
AGGTGAGCGTGGTGGCGGCCAGTTCACGACCCAGCTGGCGCCCACTGGGGCATCGAGAAGACCCGCGACACCTACCACCACCACCGCTGGACGC  
CCTGATCATTGCGGCTTCTAGCCAGCTGAACCTGTGGAAGAAGCAGAAGAACCCTGGTGGCTACAGCGAGGACAGCTGCTGGACATCGAGACC  
GGCGAGCTGATCAGCGACGACGAGTACAAGGAGAGCGTGTTCAGGCCCTTACCAGCACTTCTGGACACCTTGAAGAGCAAGGAGTTCGAGGACA  
GCATCCTGTTACGCTACCAGGTGGACAGCAAGTTCACCCGCAAGATCAGCGACGCCACCATCTACGCCACCCGCCAACGTTGGGCAAGGACAA  
GGCCGACGAGACCTACGTGCTGGGCAAGATCAAGGACATCTACACCCAGGACGGCTACGACGCTTCAATGAAGATCTACAAGAAGGACAAGGCAAG  
TTCTGTATGTACCGCCAGCCAGACCTTCGAGAAGGTGATCGAGCCCATCCTGGAGAACTACCCCAACAAGCAGATCAACGATAAAGGCAAGG  
AGGTGCCCTGCAACCCCTTCTGAAGTACAAGGAGGACACGGCTACATCCGCAAGTACAGCAAGAAGGGCAACGGCCCGAGATCAAGAGCCTGAA  
GTACTACGACAGCAAGCTGGGCAACCACATCGACATCACCCCAAGGACAGCAACAACAAGGTGGTGTGACAGCGGTGAGGCCCTGGCGCGCCGAC  
AGGAGAAGTACAACGACATCAAGAAGAAGGAGGGCTGGACAGCGACAGCGAGTTCAGTTCACCTGTACAAGAAGCAGCTTCTGCTGGTGAAGGA  
CACCGAGACCAAGGAGCAACAGCTGTTCCGCTTCTGAGCCGACCATGCCCAAGCAGAAGCACTACGTGGAGCTGAAGCCCTACGACAGCAGAAG  
TTCGAGGGCGGCCAGGCCCTGATCAAGGTGCTGGGCAACAGCGGCCAGTGAAGAAGGGCTGGGCAAGAGCAACATCAGCATCTACA  
AGGTGGCACCAGCTGCTGGCAACCAGCACAATCAAGAACGAGGGCGACAAGCCCAAGCTGGACTTCGGGCCGAGATCCAAAAAAGAAAG  
AAAGGTAGATCCAAAAAAGAAAGAAAGGTAGATCCAAAAAAGAAAGAAAGGTAGATACGGCCGCATAG

>Cas9<sup>ST1</sup> VP64  
m4

gccaccATGAGCGACCTGGTGTGGCCCTGGCCATCGGCATCGGCAGCGTGGGCGTGGGCATCCTGAACAAGGTGACCGCGGAGATCATCCAAGA  
ACAGTCGCATCTTCCCTGCTGCTCAGGCTGAGAACAACCTGGTGGCGCGCACCAACCGCCAGGGTCGCGCGCTTGCTCGCCGCAAGAAGCACCGGCG  
CGTGGCCCTGAACCGCTGTTCGAGGAGAGCGGCTGATCACCAGCTTACCAAGATCAGCATCAACCTGAACCCCTACCAGCTGCGCGTGAAGGGC  
CTGACCGACGAGCTGAGCAACGAGGAGTGTTCATCGCCCTGAAGAACATGGTGAAGCACCAGCGGATCAGCTACCTGGACGACGCCAGCGAGGACG  
GCAACAGCAGCGTGGGGACTACGCCAGATCGTGAAGGAGAACAGCAAGCAGCTGGAGACCAAGACCCCGGCCAGATCCAGCTGGAGCGCTACCA  
GACCTACGGCCAGCTGCGCGGCCAGTTCACCGTGGAGAAGGAGGGCAAGAAGCACCAGCTGATCAACGTGTTCCCCACCAGCGCTACCAGCGAGG  
GCCCTGGCATCCTGCAGACCCAGCAGGAGTTCACACCCAGATCACCAGCAGTTCATCAACCGCTACCTGGAGATCCTGACCGGCAAGCGCAAGT  
ACTACCAGGCCCGGCCAACGAGAAGAGCCGACCCGACTACGGCCGCTACCGCACCAGCGGCGAGACCTGGACAACATCTTCCGCTCCTGATCGG  
CAAGTGCACCTTCTACCCCGACGAGTTCGCGCGCGCAAGGCCAGCTACACCCCGAGGAGTTCACCTGCTGAACGACCTGAACAACCTGACCGTG  
CCACCCGAGACCAAGAAGCTGAGCAAGGAGCAGAAGAACCAGATCATCAACTACGTGAAGAAGCAGGAGGCAAGGCCATGGGCCCGGCCAAGTGTTCAGT  
ACATCGCCAAGCTGCTGAGCTGCGACGTTGGCCGACATCAAGGGCTACCGCATCGACAAGAGCGGCAAGGCCGAGATCCACACCTTCGAGGCCCTACCG  
CAAGATGAAGACCTGGAGACCTGGACATCGAGCAGATGGACCGGAGACCTGGACAAGCTGGCCCTACGTGCTGACCTGAACACCGAGCGCGAG  
GGCATCCAGGAGGCCCTGGAGCAGGATTCGCCGACGGCAGCTTACGCCAAGCAGGTTGGACGAGCTGGTGCAGTTCGCGAAGGCCAACAGCAGCA  
TCTTCCGCAAGGGCTGGCACAACCTCAGCGTGAAGCTGATGATGGAGCTGATCCCGAGCTGTACGAGACCAGCGAGGAGCAGATGACCATCTGAC  
CGCCCTGGGCAAGCAGAAGACCAACAGCAGCAGCAACAAGACCAAGTACATCGACGAGAAGCTGCTGACCGAGGAGATCTACAACCCCGTGGTGGCC  
AAGAGCGTGGCCAGGCCATCAAGATCGTGAACGCCGCCATCAAGGAGTACGGCGACTTCGACAACATCGTGTGATCGAGATGGCCCGGAGACCAACG  
AGGACGACGAGAAGAAGGCCATCCAGAAGATCCAGAAGGCCAACAAAGGACGAGAAGGACGCGCCATGCTGAAGGCCGCCAACAGTACAACGGCAA  
GGCCGAGCTGCCCCACAGCGTGTTCACGGCCACAAGCAGCTGGCCACCAAGATCCGCTGTGGCCACCAGCAGGGCGAGCGCTGCCTGTACACCGGC  
AAGACCATCAGCATCCAGCAGCTGATCAACAACAGCAACCAAGTTCGAGGTGGCTGCCATCCTGCCCTGAGCATCACCTTCGACGACAGCCTGGCCA  
ACAAGGTGCTGGTGTACGCCACCGCCGCTCAGGAGAAGGGCCAGCGCACCCCTACCAGGCCCTGGACAGCATGGACGACGCTGGAGCTTCCGCGA  
GCTGAAGGCCCTTCGTGCGCGAGAGCAAGACCTGAGCAACAAGAAGAAGGAGTACCTGCTGACCGAGGAGGACATCAGCAAGTTCGACGTGCGCAAG  
AAGTTCATCGAGCGCAACCTGGTGGACACCCGCTACGCCAGCCGCTGGTGTGAACGCCCTGCAGGAGCACTTCCGCGCCCAACAAGATCGACACCA  
AGGTGAGCGTGGTGGCGGCCAGTTCACAGCCAGCTGCGCCGCACTGGGGCATCGAGAAGACCCCGGACACCTACCACCACCACCGCTGGACGC  
CCTGATCATTGCGGCTTCTAGCCAGCTGAACCTGTGGAAGAAGCAGAAGAACCCTGGTGGCTACAGCGAGGACAGCTGCTGGACATCGAGACC  
GGCGAGCTGATCAGCGACGACGAGTACAAGGAGAGCGTGTTCAGGCCCTTACCAGCACTTCTGGACACCTTGAAGAGCAAGGAGTTCGAGGACA  
GCATCCTGTTACGCTACCAGGTGGACAGCAAGTTCACCCGCAAGATCAGCGACGCCACCATCTACGCCACCCGCCAGGCCAACGTTGGGCAAGGACAA  
GGCCGACGAGACCTACGTGGGCAAGATCAAGGACATCTACACCCAGGACCGCTACCGCAAGTACAGCAAGAAGGGCAACGGCCCGAGATCAAGAGCCTGAA  
TTCCTGATGTACCGCCACGACCCCCAGACCTTCGAGAAGGTGATCGAGCCCATCCTGGAGAACTACCCCAACAAGCAGATCAACGATAAAGGCAAGG  
AGGTGCCCTGCAACCCCTTCTGAAGTACAAGGAGGACACGGCTACATCCGCAAGTACAGCAAGAAGGGCAACGGCCCGAGATCAAGAGCCTGAA  
GTACTACGACAGCAAGCTGGGCAACCACATCGACATCACCCCAAGGACAGCAACAACAAGGTGGTGTGACAGCGGTGAGGCCCTGGCGCGCCGAC  
GTGTACTTCAACAAGACCACGGCAAGTACGAGATCCTGGGCCGTAAGTACGCCGACCTGCAGTTCGATAAAGGGCACCGCCACTACAAGATCAGCC  
AGGAGAAGTACAACGACATCAAGAAGAAGGAGGGCGTGGACAGCGACGAGTTCAGTTCACCTGTACAAGAACGACCTTCTGCTGGTGAAGGA  
CACCGAGACCAAGGAGCAACAGCTGTTCCGCTTCTGAGCCGACCATGCCAAGCAGAAGCACTACGTGGAGCTGAAGCCCTACGACAAGCAGAAG  
TTCGAGGGCGGCCAGGCCCTGATCAAGGTGCTGGGCAACAGCGGCCAGTGAAGAAGGGCTGGGCAAGGAGCAACATCAGCATCTACA  
AGGTGGCACCAGCTGCTGGCAACCAGCACAATCATCAAGAACGAGGGCGACAAGCCCAAGCTGGACTTCAGCAGGGCTGACCCCAAGAAGAAAG  
GAAGGTGGAGGCCAGCGTTCGGACGGGCTGACGCATTTGGACGATTTTGTATCGGATATGCTGGGAAGTACGCCCTCGATGATTTTTCACCTGAC  
ATGCTTGGTTCGATGCCCTTGATGACTTTGACCTCGACATGCTCGGCAGTACGCCCTTGATGATTCGACCTGGACATGCTGATTAACCTTAGAT  
GA

>Cas9<sup>ST1</sup><sub>m4</sub> VP64<sup>N</sup>

gccaccATGCCAAGAAGAAGGAAGGTGAGCGACCTGGTGTGGGCTGGCCATCGGCATCGGCAGCGTGGGCGTGGGCATCCTGAACAAGGTGA  
CCGGCGAGATCATCCACAAGAACAGTTCGCATCTTCCCTGCTGCTCAGGCTGAGAACAACCTGGTGCGCCGACCAACCGCCAGGGTTCGCCGGTTCG  
TCGCCGCAAGAAGCACCGCGCGTTCGCTGACCCGCTGTTTCGAGGAGAGCGGCTGATCACCCTTACCAAGATCAGCATCAACCTGAAACCC  
TACCAGCTGCGGCTGAAGGGCTGACCGACGAGCTGAGCAACGAGGAGCTGTTTCATCGCCCTGAAGAACATGGTGAAGCACCGCGGCATCAGCTACC  
TGGACGACGCCAGCGACGACGGCAACAGCAGCGTGGGCGACTACGCCAGATCGTGAAGGAGAACAGCAAGCAGTGGAGACCAAGACCCCGGCCA  
GATCCAGCTGGAGCGCTACCAGACCTACGGCCAGCTGCGCGGCGACTTACCCTGGAGAAGGACGGCAAGAAGCACCAGCTGATCAACGTGTTCCCC  
ACCAGCGCTACCAGCGAGGCGCTGCGCATCTTGCAGACCCAGCAGGAGTTCAACCCAGATCACCAGCAGATTCATCAACCCGTACCTGGAGA  
TCCTGACCGGCAAGCGCAAGTACTACCAGGCCCGGCCAACGAGAAGAGCCGACCGACTACGGCCGTACCAGCACCAGCGCGAGACCTGGACAA  
CATCTTCGGCATCTGATCGGCAAGTGCACCTTACCCCGACGAGTTCCGCGCCGCCAAGGCCAGCTACACCGCCAGGAGTTCAACCTGCTGAAC  
GACCTGAACAACCTGACCGTGCACCAGGACCAAGAAGCTGAGCAAGGAGCAGAAGAACCAGATCATCAACTACGTGAAGAACGAGAAGGCCATGG  
GCCGCCAAGCTGTTCAAGTACATCGCCAAGCTGCTGAGCTGCGAGCTGCGCGCATCAAGGGCTACCGCATCGACAAGAGCGGCAAGGCCGAGAT  
CCACACCTTCGAGGCTACCAGCAAGATGAAGACCTGGAGACCTGGACATCGAGCAGATGGACCGGAGACCTGGACAAGCTGGCTACGTGCTG  
ACCTGAACACCGAGCGGAGGGCATCCAGGAGGCCCTGGAGACGAGTTCCGCGACGGCAGCTTACGCCAGAAGCAGGTGGACGAGCTGGTGCAGT  
TCCGCAAGGCCAACAGCAGCATCTTCGGCAAGGGCTGGCACAACCTTACGCTGAAGCTGATGATGGAGCTGATCCCGAGCTGTACGAGACCCAGCA  
GGACGAGATGACCTTACCCGCTGGCAAGCAGCAAGGACCTGATCAACAACAGCAACCAAGTACATCGACGAGAAGCTGATCGACGAGACCCAGG  
ATCTACAACCCCGTGGTGGCAAGAGCGTGCGCCAGGCCATCAAGATCGTGAACGCCGCCATCAAGGAGTACGGCGACTTCGACAACATCGTGTG  
AGATGGCCCGCGAGACCAACGAGGACGACGAGAAGAAGGCCATCCAGAAGATCCAGAAGGCCAACAAGGACGAGAAGGACGCCGCCATGCTGAAGGC  
CGCAACCCAGTACAACGGCAAGGCCGAGCTGCCCCACAGCGTGTTCACCGGCCACAAGCAGCTGGCCACCAAGATCCGCTGTGGCACCCAGCAGGGC  
GAGCGCTGCTGTACACCAGCAAGACCATCAGCATCCAGACCTGATCAACAACAGCAACCAAGTTCGAGGTGGCTGCCATCCTGCCCTGAGCATCA  
CCTTCGACGACAGCTGGCCAACAAGGTGCTGGTGTACGCCACCGCCGCTCAGGAGAAGGGCCAGCGCACCCCTACCAGGCCCTGGACAGCATGGA  
CGACGCTGGAGCTTCGCGGAGCTGAAGGCCTTCGTGCGCGAGAGCAAGACCTGAGCAACAAGAAGAAGGAGTACCTGCTGACCGAGGAGGACAT  
AGCAAGTTCGAGCTGCGCAAGAAGTTCATCGAGCGCAACCTGGTGGACACCCGCTACGCCAGCCGCTGGTGTGAACGCCCTGCAGGAGCACTTC  
GCCGCCAAGAATCGACACCAAGGTGAGCGTGGTGGCGGCCAGTTCACAGCCAGCTGCGCCGCACTGGGGCATCGAGAAGACCCCGCACACCTA  
CCACCACCGCCGTTGGACGCCCTGATCATTGGCGTCTTAGCCAGCTGAACCTGTGGAAGAAGCAGAAGAACACCCCTGGTGGACTACAGCGAGGAC  
CAGCTGCTGGACATCGAGACCGCGGAGCTGATCAGCGACGACGAGTACAAGGAGAGCGTGTTCAGGCCCCCTACCAGCACTTCGTGGACACCCCTGA  
AGAGCAAGGAGTTCGAGGACAGCATCTTTCAGTACCAGGTGGACAGCAAGTTCACCCGCAAGATCAGCGACGCCACCATCTACGCCACCCGCCA  
GGCAAGGTGGCAAGGCAAGGCCACGAGACCTACGTGCTGGGCAAGATCAAGGACATCTACACCAGGACGGCTACGACCCCTTCATGAAGATC  
TACAAGAAGGACAAGAGCAAGTTCCTGATGTACCGCCACGACCCCCAGACCTTCGAGAAGGTGATCGAGCCATCCTGGAGAACTACCCCAACAAGC  
AGATCAACGATAAAGGCCAAGGAGGTGCCCTGCAACCCCTTCTGAAAGTACAAGGAGGAGCAGCGCTACATCCGCAAGTACAGCAAGAAGGGCAACGG  
CCCCGAGATCAAGAGCCTGAAGTACTACGACAGCAAGCTGGGCAACACATCGACATCACCCCAAGGACAGCAACAACAGGTGGTGTGCAGAGC  
GTGAGCCCTGGCGCGCCGACCTGTACTTCAACAAGACCACCGGCAAGTACGAGATCCTGGGCTGAAGTACGCCAGCTGCAGTTTGATAAAGGGCA  
CCGGCACCTACAAGATCAGCCAGGAGAAGTACAACGACATCAAGAAGAAGGAGGGCGTGGACAGCGACAGCGAGTTCAGTTTACCCTGTACAAGAA  
CGACCTTCTGCTGGTGAAGGACACCGAGACCAAGGAGCAACAGCTGTTCGCTTCCTGAGCCGACCATGCCAAGCAGAAGCACTACGTGGAGCTG  
AAGCCCTACGACAAGCAGAAGTTCGAGGGCGCGGAGGCCCTGATCAAGGTGCTGGGCAACGTGGCCAACAGCGGCCAGTGCAGAAGGGCCCTGGGCA  
AGAGCAACATCAGCATCTACAAGGTGCGCAGCGACTGCTGGGCAACAGCAGCATCAAGAAGCAGAGGGCGCAAGCCAGCTGGACTTAAAGCAG  
GGCTGACCCCAAGAAGAAGGAAGGTGGAGGCCAGCGGTTCCGGACGGGCTGACGCATTGGACGATTTTGATCTGGATATGCTGGGAAGTGACGCC  
CTCGATGATTTTGACCTTGACATGCTTGGTTCGGATGCCCTTGATGACTTTGACCTCGACATGCTCGGCAGTGACGCCCTTGATGATTTGACCTGG  
ACATGCTGATTAACCTCTAGATGA

>Cas9<sup>NM</sup>

gccaccATGGCCGCTTCAAGCCCAACCCATCAACTACATCCTGGGCTGGACATCGGCATCGGCAGCGTGGGCTGGGCCATGGTGGAGATCGAGC  
AGGACGAGAACCCCATCTGCCTGATCGACCTGGGTGTGCGGCTGTTTCGAGCGCGCTGAGGTGCCCAAGACTGGTGCAGCTCTGGCTATGGCTCGCCG  
GCTTGCTCGCTCTGTTTCGGCGCCTTACTCGCCGGCGCGCTCACCAGCTTCTGCGCGCTCGCCGCTGCTGAAGCGCGAGGGTGTGCTGCAGGCTGCC  
GACTTCGACGAGAACGGCCTGATCAAGAGCCTGCCAACACTCCTTGGCAGCTGCGCGCTGCGCTCTGGACCGCAAGCTGACTCCTCTGGAGTGGAA  
GCCCTGCTGCTGCACCTGATCAAGCACCAGCGCTACTGAGGACCGCAAGCAAGCAGGAGGCGAGACCGGCAAGGAGCTGGTGTCTGCTGAA  
GGGCGTGGCCGACAACGCCACGCCCTGCAGACTGGTACTTCCGACTCCTGCTGAGCTGGCCCTGAACAAGTTCGAGAAGGAGAGCGGCCACATC  
CGCAACAGCGCGGCGACTACAGCCACACCTTCAGCCGCAAGGACCTGCAGGCGGAGTGTGATCCTGCTGTTTCGAGAAGCAGAGGAGTTCGGCAAC  
CCCAGTGTAGCGGCGGCTGAAGGAGGGCATCGAGACCTGCTGATACCCAGCGCCCGCTGAGCGGCGACCGCTGCAGAAGATGCTGGGCCA  
CTGCACCTTCGAGCCAGCGAGCCCAAGGCCGCGCAAGAACACCTACACCCAGCGCGCTTCACTGGCTGACCAAGCTGAACAACCTGCGGCATCCTG  
GAGCAGGGCAGCGAGCGCCCTGACCGACACCGAGCGCGCCACCTGATGGACGAGCCCTACCGCAAGAGCAAGCTGACCTACGCCAGGCCCGCA  
AGCTGCTGGGTCTGGAGGACACCGCCTTCTTCAAGGGCTGCGCTACGGCAAGGACAACCGCGAGGCCAGCACCCTGATGGAGATGAAGGCCCTACCA  
GCCATCAGCCGCGCCCTGGAGAAGGAGGGCCTGAAGGACAAGAAGAGTCTTGAACCTGAGCCCGAGCTGCAGGACGAGATCGGCACCGCCCTC  
AGCCTGTTCAAGACCGAGGACATCACCAGCGCCTTGAAGGACCGCAAGGAGGAGTTCAGGAGATCCTGGAGGCCCTGCTGAAGCAGCATCAGCTCGACA  
AGTTGCTGCAGATCAGCTGAAGGCCCTGCGCCGATCGTGCCTGATGGAGCAGGGCAAGCGCTACGACGAGGCCCTGCGCCGAGATCTACGGCGA  
CCACTACGGCAAGAAGAACCAGGAGAGAAGATCTACCTGCCTCTATCCCGCCGACGAGATCCGCAACCCCGTGGTGTGCGCGCCCTGAGCCAG  
GCCCGCAAGGTGATCAACGGCGTGGTGCGCCGCTACGGCAGCCCGCCCGCATCCACATCGAGACCGCCCGGAGGTGGGCAAGAGCTTCAAGGAC  
GCAAGGAGATCGAGAAGCGCAGGAGGAGAACCGCAAGGACCGGAGGAGGCCCGGCAAGTTCGCGAGTACTTCCCAACTTCGTGGGCGAGCC  
CAAGAGCAAGGACATCTGAAGTGCAGCTGTACGAGCAGCAGCAGCGCAAGTGCCTGTACAGCGGCAAGGAGATCAACCTGGGCCGCTGAACGAG  
AAGGGCTACGTGGAGATCGACACCGCCTGCCCTTACGCCGACCTGGGACGACAGCTTCAACAACAAGGTGCTGGTGTGGGCGAGCGAGAACCAGA  
ACAAGGGCAACAGACCCCTACGAGTACTTCAACGGCAAGGACAACAGCCGCGAGTGGCAGGAGTTCAGGCCCGCGTGGAGACCGAGCCCTTCCC  
CCGACGCAAGAAGCAGCGCATCTGCTGCAGAAGTTCGACGAGGAGCTTCAAGGAGCGCAACCTGAACGACACCCGCTACGTGAACCGCTTCCCTG  
TGCCAGTTCGTGGCCAGCCGATGCGCTGACCGGCAAGGGCAAGAAGCGGCTGTTCGCCAGCAACGGCCAGATCACCAACCTGCTGCGCGGCTTCT

GGGGCCTGCGCAAGGTGCGCGCCGAGAACGACCGCCACCACGCCCTGGACGCCGTGGTGGCTGCAGCACCGTGGCCATGCAGCAGAAGATCAC  
CCGCTTCGTGCGCTACAAGGAGATGAACGCCTTCGACGGTAAACCATCGACAAGGAGACCGGCGAGGTGCTGCACCAGAAGACCCACTTCCCCCAG  
CCCTGGGAGTTCTTCGCCCGAGGTGATGATCCGCGTGTTCGGCAAGCCCGAGCCGAGTTCGAGGAGGCCGACACCCCGGAGAAGGTGC  
GCACCCTGCTGGCCGAGAAGCTGAGCAGCCGCCCTGAGGCCGTGCACGAGTACGTGACTCCTCTGTTCTGAGCCCGCCCCAACCCGAAGATGAG  
CGGTCAGGGTCACATGGAGACCGTGAAGAGCGCCAAGCGCCTGGACGAGGGCGTGAGCGTGTGCGCGTGCACCCTGACCCAGCTGAAGCTGAAGGAC  
CTGGAGAAGATGGTGAACCGCGAGCGCGAGCCCAAGCTGTACGAGGCCCTGAAGGCCCGCCTGGAGGCCCAAGGACGACCCCGCCAAAGCCCTCG  
CCGAGCCCTTCTACAAGTACGACAAGGCCGGAACCCGACCCAGCAGGTGAAGGCCGTGCGCGTGGAGCAGGTGCAGAAGACCGGCGTGTGGGTGCG  
CAACCACAACGGCATCGCCGACAACGCCACCATGGTGCAGCTGGACGTGTTTCGAGAAGGGCGACAAGTACTACCTGGTGCCTACTACAGCTGGCAG  
GTGGCCAAAGGATCCTGCCCGACCGCGCCGTGGTGCAGGGCAAGGACGAGGAGGACTGGCAGCTGATCGACGACAGCTTCAACTTCAAGTTACGCC  
TGCACCCCAACGACCTGGTGGAGGTGATCACCAGAAGGCCCGCATGTTCCGGTACTTCGCCAGCTGCCACCGCGGCAACCCGCAACATCAACATCCG  
CATCCACGACCTGGACCAAGAATCGGCAAGAACGGCATCCTGGAGGGCATCGGCGTGAAGACCGCCCTGAGCTTCCAGAAGTACCAGATCGACGAG  
CTGGGCAAGGAGATCCGCCCTGCCCTGAAGAAGCGCCCTCCTGTGCGCAGCAGGGCTGACCCCAAGAAGAAGAGGAAGGTGTGA

>Cas9<sup>NM</sup><sub>3</sub>XNLS

gccaccATGGCCGCTTCAAGCCCAACCCCATCAACTACATCCTGGGCTGGACATCGGCATCGCCAGCGTGGGCTGGCCATGGTGGAGATCGACG  
AGGACGAGAACCCCATCTGCCTGATCGACCTGGGTGTGCGCGTGTTCGAGCGCGCTGAGGTGCCCAAGACTGGTGACAGTCTGGCTATGGCTCGCCG  
GCTTGTCTCGCTGTGTTCCGGCGCCTTACTCGCCGGCGCGCTACCCGCTTCTGCGCGCTCGCCGCTGCTGAAGCGCGAGGGTGTGCTGACGGTGC  
GACTTCGACGAGAAGCCGCTGATCAAGAGCCTGCCAACACTCCTTGGCAGCTGCGCGCTGCCGCTTGGAGCCGAGTACTCCTCTGGAGTGA  
GCGCCGTGCTGCTGACCTGATCAAGCACCGCGCTACTTACGCCAGCGCAAGAACGAGGGCGAGACCGCCGACAAGGAGCTGGGTGCTCTGCTGAA  
GGGCGTGGCCGACAACGCCACGCCCCTGCAGACTGGTACTTCCGCACTCCTGCTGAGCTGGCCCTGAACAAGTTCGAGAAGGAGAGCGGCCACATC  
CGCAACCAGCGCGCGACTACAGCCACACCTTCAGCCGCAAGGACCTGCAGGCCGAGCTGATCCTGCTGTTTCGAGAAGCAGAGGAGTTCGGCAACC  
CCCAGTGTAGCGCGCCCTGAAGGAGGGCATCGAGACCCTGCTGATGACCCAGCGCCCGCCTGAGCGCGACGCGCTGCAGAAGATGCTGGGCCA  
CTGCACCTTCGAGCCAGCCGAGCCCAAGGCCGCAAGAACACCTACACCGCGGAGCGCTTCACTTGGCTGACCAAGCTGAACAACCTGCGCATCCTG  
GAGCAGGGCAGCGAGCGCCCTGACCGACACCGAGCGCGCCACCTGATGGACGAGCCCTACCGCAAGGCAAGCTGACCTACGCCAGGCCCGCA  
AGTGTCTGGGTCTGGAGGACACCGCCTTCTTCAAGGGCTGCGCTACGGCAAGGACAACGCGGAGGCCAGCACCTGATGGAGATGAAGGCCATACCA  
GCCATCAGCCGCGCCCTGGAGAAGGAGGGCCTGAAGGACAAGAAGTCTCTGAACCTGAGCCCGAGCTGCAGGACGAGATCGGCACCGCCTTC  
AGCCTGTTCAAGACCGAGCAGGACATCACCAGCCGCTGAAAGGACCGCATCCAGCCGAGATCCTGGAGGCCCTGCTGAAGCACATCAGCTTCGACA  
AGTTCGTGAGATCAGCTGAAGGCCCTGCGCCGATCGTGCCTGATGGAGCAGGGCAAGCGCTACGACGAGGCCCTGCGCCGAGATCTACGGCGA  
CCACTACGGCAAGAAGAACACCGAGGAGAAGATCTACCTGCCTCTATCCCGCCGACGAGATCCGCAACCCCGTGGTGTGCGCGCCCTGAGCCAG  
GCCCGAAGGTGATCAACGGCGTGGTGCAGCGCTACGGCAGCCCGCCGCTCCACATCGAGACCCCGCGAGGTGGCCCAAGAGCTTCAAGGACC  
GCAAGGAGATCGAGAAGCGCCAGGAGGAGAACCAGGACCGCATCCAGCCGAGATCCTGAGGCGCAAGTTCGCGGAGTACTTCCCAACTTCTGGGCGAGCC  
CAAGAGCAAGGACATCCTGAAGTTCGCGCTGTACGAGCAGCAGCACGGCAAGTGCCTGTACAGCGCAAGGAGATCAACCTGGGCCGCTGAACGAG  
AAGGGCTACGTGGAGATCGACACGCCCCCTGCCCTTACGCCGACCTGGGACGACAGCTTCAACAACAAGGTGCTGGTGTGGCGAGCGAGAACCAGA  
ACAAGGGCAACCAGACCCCTACGAGTACTTCAACGGCAAGGACAACAGCCGCGAGTGGCAGGAGTTCAGGCCCGCTGGAGACCAGCCGCTTCCC  
CCGACGCAAGAAGCAGCAGGAGTGTGCTGCGAGAAGTTCGACGAGGACCGCTTCAAGGAGCGCAACTTGAACGACACCCGCTACGTGAACCGCTTCCG  
TGCCAGTTCGTGGCCGACCGCATGCGCTGACCGGCAAGGGCAAGAAGCGCGTGTTCGCCAGCAACGGCCAGATCACCACCTGCTGCGCGGCTTCT  
GGGCGCTGCGCAAGGTGCGCGCCGAGAACGACCGCCACACCGCCCTGGACCGCGTGGTGGTGGCTGCAGCACCGTGGCCATGCAGCAGAAGATCAC  
CCGCTTCGTGCGCTACAAGGAGATGAACGCCTTCGACGGTAAACCATCGACAAGGAGACCGGCGAGGTGCTGCACCAGAAGACCCACTTCCCCCAG  
CCCTGGGAGTTCCTTCGCCAGGAGGTGATGATCCGCGTGTTCGGCAAGCCCGAGTTCGAGGAGGCCGACACCCCGGAGAAGCTGC  
GCACCCTGCTGGCCGAGAAGCTGAGCAGCCGCCCTGAGGCCGTGCACGAGTACGTGACTCCTCTGTTCTGAGCCCGCCCCAACCCGAAGATGAG  
CGGTCAGGGTCACATGGAGACCGTGAAGAGCGCCAAGCGCCTGGACGAGGGCGTGAGCGTGTGCGCGTGCACCCTGACCCAGCTGAAGCTGAAGGAC  
CTGGAGAAGATGGTGAACCGCGAGCGCGAGCCCAAGCTGTACGAGGCCCTGAAGGCCCGCCTGGAGGCCCAAGGACGACCCCGCCAAAGCCCTTCG  
CCGACCCCTTCTACAAGTACGACAAGGCCGGAACCCGACCCAGCAGGTGAAGGCCGTGCGCGTGGAGCAGGTGCAGAAGACCGGCGTGTGGGTGCG  
CAACCACAACGGCATCGCCGACAACGCCACCATGGTGCAGCTGGACGTGTTTCGAGAAGGGCGACAAGTACTACCTGGTGCCTACTACAGCTGGCAG  
GTGGCCAAAGGATCCTGCCCGACCGCGCCGTGGTGCAGGGCAAGGACGAGGAGGACTGGCAGCTGATCGACGACAGCTTCAACTTCAAGTTACGCC  
TGCACCCCAACGACCTGGTGGAGGTGATCACCAGAAGGCCCGCATGTTCCGGTACTTCGCCAGCTGCCACCGCGGCAACCCGCAACATCAACATCCG  
CATCCACGACCTGGACCAAGAATCGGCAAGAACGGCATCCTGGAGGGCATCGGCGTGAAGACCGCCCTGAGCTTCCAGAAGTACCAGATCGACGAG  
CTGGGCAAGGAGATCCGCCCTGCCCTGAAGAAGCGCCCTCCTGTGCGCGCGGCCGAGATCCAAAAAGAAGAGAAAGGTAGATCCAAAAAGA  
AGAGAAAGGTAGATCCAAAAAGAAGAGAAAGGTAGATACGGCCGATAG

>Cas9<sup>NM</sup><sub>m4</sub> VP64

gccaccATGGCCGCTTCAAGCCCAACCCCATCAACTACATCCTGGGCTGGCCATCGGCATCGCCAGCGTGGGCTGGCCATGGTGGAGATCGACG  
AGGACGAGAACCCCATCTGCCTGATCGACCTGGGTGTGCGCGTGTTCGAGCGCGCTGAGGTGCCCAAGACTGGTGACAGTCTGGCTATGGCTCGCCG  
GCTTGTCTCGCTGTGTTCCGGCGCCTTACTCGCCGGCGCGCTACCCGCTTCTGCGCGCTCGCCGCTGCTGAAGCGCGAGGGTGTGCTGACGGTGC  
GACTTCGACGAGAAGCCGCTGATCAAGAGCCTGCCAACACTCCTTGGCAGCTGCGCGCTGCCGCTTGGAGCCGAGTACTCCTCTGGAGTGA  
GCGCCGTGCTGCTGACCTGATCAAGCACCGCGCTACTTACGCCAGCGCAAGAAGTACTACCTGGTGCCTACTACAGCTGGCAG  
GTGGCCAAAGGATCCTGCCCGACCGCGCCGTGGTGCAGGGCAAGGACGAGGAGGACTGGCAGCTGATCGACGACAGCTTCAACTTCAAGTTACGCC  
TGCACCCCAACGACCTGGTGGAGGTGATCACCAGAAGGCCCGCATGTTCCGGTACTTCGCCAGCTGCCACCGCGGCAACCCGCAACATCAACATCCG  
CATCCACGACCTGGACCAAGAATCGGCAAGAACGGCATCCTGGAGGGCATCGGCGTGAAGACCGCCCTGAGCTTCCAGAAGTACCAGATCGACGAG  
CTGGGCAAGGAGATCCGCCCTGCCCTGAAGAAGCGCCCTCCTGTGCGCGCGGCCGAGATCCAAAAAGAAGAGAAAGGTAGATCCAAAAAGA  
AGAGAAAGGTAGATCCAAAAAGAAGAGAAAGGTAGATACGGCCGATAG



**Supplementary Software 1** | The patternProp.py script returns total reads and fraction of reads for each 1-base derivative of an input PAM.

Usage: python patternProp.py [PAM] file.fastq

```
#!/usr/bin/env python
import sys
from Bio import SeqIO
pattern=sys.argv[1]
for arg in sys.argv[2:]:
    A=[0,0,0,0,0,0,0,0]
    T=[0,0,0,0,0,0,0,0]
    C=[0,0,0,0,0,0,0,0]
    G=[0,0,0,0,0,0,0,0]
    pA=[]
    pT=[]
    pC=[]
    pG=[]
    for rec in SeqIO.parse(arg, "fastq"):
        is_fit=1
        for j,p in enumerate(pattern):
            if str(p)!='N' and str(p)!=str(rec.seq[j]):
                is_fit=0
        if is_fit:
            for i,b in enumerate(str(rec.seq)):
                if b=='A':
                    A[i]=A[i]+1
                elif b=='T':
                    T[i]=T[i]+1
                elif b=='C':
                    C[i]=C[i]+1
                elif b=='G':
                    G[i]=G[i]+1
                else:
                    z=0
    for p in xrange(0,8,1):
        sum=A[p]+T[p]+C[p]+G[p]
        pA.append(float(A[p])/float(sum))
        pT.append(float(T[p])/float(sum))
        pC.append(float(C[p])/float(sum))
        pG.append(float(G[p])/float(sum))
    print arg+' absolute'+pattern
```

```

print '\p      1      2      3      4      5      6      7      8'
print 'A '+str(A[0])+ ' '+str(A[1])+ ' '+str(A[2])+ ' '+str(A[3])+ ' '+str(A[4])+
'+str(A[5])+ ' '+str(A[6])+ ' '+str(A[7])
print 'T '+str(T[0])+ ' '+str(T[1])+ ' '+str(T[2])+ ' '+str(T[3])+ ' '+str(T[4])+
'+str(T[5])+ ' '+str(T[6])+ ' '+str(T[7])
print 'C '+str(C[0])+ ' '+str(C[1])+ ' '+str(C[2])+ ' '+str(C[3])+ ' '+str(C[4])+
'+str(C[5])+ ' '+str(C[6])+ ' '+str(C[7])
print 'G '+str(G[0])+ ' '+str(G[1])+ ' '+str(G[2])+ ' '+str(G[3])+ ' '+str(G[4])+
'+str(G[5])+ ' '+str(G[6])+ ' '+str(G[7])
print arg+' percent'
print '\p      1      2      3      4      5      6      7      8'
print 'A '+str(pA[0])+ ' '+str(pA[1])+ ' '+str(pA[2])+ ' '+str(pA[3])+ ' '+str(pA[4])+
'+str(pA[5])+ ' '+str(pA[6])+ ' '+str(pA[7])
print 'T '+str(pT[0])+ ' '+str(pT[1])+ ' '+str(pT[2])+ ' '+str(pT[3])+ ' '+str(pT[4])+
'+str(pT[5])+ ' '+str(pT[6])+ ' '+str(pT[7])
print 'C '+str(pC[0])+ ' '+str(pC[1])+ ' '+str(pC[2])+ ' '+str(pC[3])+ ' '+str(pC[4])+
'+str(pC[5])+ ' '+str(pC[6])+ ' '+str(pC[7])
print 'G '+str(pG[0])+ ' '+str(pG[1])+ ' '+str(pG[2])+ ' '+str(pG[3])+ ' '+str(pG[4])+
'+str(pG[5])+ ' '+str(pG[6])+ ' '+str(pG[7])

```



**Supplementary Software 2** | The patternProp3.py script returns fraction of total reads for each 1-base derivative of an input PAM.

Usage: python patternProp3.py [PAM] file.fastq

```
#!/usr/bin/env python
#Take pattern as arg1, fg as arg2 and bg as arg3
import sys
from Bio import SeqIO
pattern=sys.argv[1]
A=[0,0,0,0,0,0,0,0,0]
T=[0,0,0,0,0,0,0,0,0]
C=[0,0,0,0,0,0,0,0,0]
G=[0,0,0,0,0,0,0,0,0]
pA=[]
pT=[]
pC=[]
pG=[]
for rec in SeqIO.parse(sys.argv[2], "fastq"):
    is_fit=1
    for j,p in enumerate(pattern):
        if str(p)!='N' and str(p)!=str(rec.seq[j]):
            is_fit=0
    if is_fit:
        for i,b in enumerate(str(rec.seq)):
            if b=='A':
                A[i]=A[i]+1
            elif b=='T':
                T[i]=T[i]+1
            elif b=='C':
                C[i]=C[i]+1
            elif b=='G':
                G[i]=G[i]+1
            else:
                z=0
        Abg=[0,0,0,0,0,0,0,0,0]
        Tbg=[0,0,0,0,0,0,0,0,0]
        Cbg=[0,0,0,0,0,0,0,0,0]
        Gbg=[0,0,0,0,0,0,0,0,0]
        pAbg=[]
        pTbg=[]
        pCbg=[]
```

```

pGbg=[]
for rec in SeqIO.parse(sys.argv[2], "fastq"):
    for i,b in enumerate(str(rec.seq)):
        if b=='A':
            Abg[i]=Abg[i]+1
        elif b=='T':
            Tbg[i]=Tbg[i]+1
        elif b=='C':
            Cbg[i]=Cbg[i]+1
        elif b=='G':
            Gbg[i]=Gbg[i]+1
        else:
            z=0
for p in xrange(0,8,1):
    sumbg=Abg[p]+Tbg[p]+Cbg[p]+Gbg[p]
    pAbg.append(float(Abg[p])/float(sumbg))
    pTbg.append(float(Tbg[p])/float(sumbg))
    pCbg.append(float(Cbg[p])/float(sumbg))
    pGbg.append(float(Gbg[p])/float(sumbg))
for p in xrange(0,8,1):
    sumbg=Abg[p]+Tbg[p]+Cbg[p]+Gbg[p]
    pA.append(float(A[p])/float(sumbg))
    pT.append(float(T[p])/float(sumbg))
    pC.append(float(C[p])/float(sumbg))
    pG.append(float(G[p])/float(sumbg))
print str(sys.argv[1])+' percentFGs/total'
print 'b\p      1      2      3      4      5      6      7      8'
print 'A '+str(pA[0])+ ' '+str(pA[1])+ ' '+str(pA[2])+ ' '+str(pA[3])+ ' '+str(pA[4])+ ' '+str(pA[5])+
      '+str(pA[6])+ ' '+str(pA[7])
print 'T '+str(pT[0])+ ' '+str(pT[1])+ ' '+str(pT[2])+ ' '+str(pT[3])+ ' '+str(pT[4])+ ' '+str(pT[5])+
      '+str(pT[6])+ ' '+str(pT[7])
print 'C '+str(pC[0])+ ' '+str(pC[1])+ ' '+str(pC[2])+ ' '+str(pC[3])+ ' '+str(pC[4])+ ' '+str(pC[5])+
      '+str(pC[6])+ ' '+str(pC[7])
print 'G '+str(pG[0])+ ' '+str(pG[1])+ ' '+str(pG[2])+ ' '+str(pG[3])+ ' '+str(pG[4])+ ' '+str(pG[5])+
      '+str(pG[6])+ ' '+str(pG[7])

```
